# Supplementary material for: Gold-catalyzed efficient synthesis of azepan-4-ones via a two-step [5 + 2] annulation
Source: Royal Society of Chemistry journal article supplement (doi:10.1039/c001314e), 2010-01-01

## Supporting Information

### **Gold-Catalyzed Efficient Synthesis of Azepan-4-ones via A Two-Step [5+2] Annulation**

Li Cui, Longwu Ye and Liming Zhang

Department of Chemistry and Biochemistry, University of California, Santa Barbara,  
California, 93106

| <b>Content</b>                                                        | <b>Page number</b> |
|-----------------------------------------------------------------------|--------------------|
| <b>General</b>                                                        | 2                  |
| <b>General procedure A: preparation of <i>N</i>-alkynylpiperidine</b> | 2                  |
| <b>Preparation of compound 7</b>                                      | 8                  |
| <b>Preparation of compound 9</b>                                      | 10                 |
| <b>Preparation of compound 11</b>                                     | 12                 |
| <b>Preparation of azepan-4-ones</b>                                   | 13                 |
| <b>X-Ray crystal data and structure for azepan-4-one 6a</b>           | 25                 |
| <b><sup>1</sup>H and <sup>13</sup>C NMR spectra</b>                   | 32                 |

**General.** Ethyl acetate (ACS grade), hexanes (ACS grade), diethyl ether (ACS grade),  $\text{NH}_4\text{OH}$  (29.4% in  $\text{H}_2\text{O}$ , ACS reagent) were purchased from Fisher Scientific and used without further purification. Anhydrous dichloromethane (HPLC grade) was purified by distillation over calcium hydride. Tetrahydrofuran was distilled over sodium/benzophenone. Commercially available reagents were used without further purification. Reactions were monitored by thin layer chromatography (TLC) using Silicycle precoated silica gel plates. Flash column chromatography was performed over Silicycle silica gel (230-400 mesh).  $^1\text{H}$  NMR and  $^{13}\text{C}$  NMR spectra were recorded on a Varian 500 MHz Unity plus spectrometer and a Varian 400 MHz spectrometer using residue solvent peaks as internal standards. Infrared spectra were recorded with a Perkin Elmer FT-IR spectrum 2000 spectrometer and are reported in reciprocal centimeter ( $\text{cm}^{-1}$ ). Mass spectra were recorded with Waters micromass ZQ detector using electrospray method.

**General procedure A: preparation of *N*-alkynylpiperidine**

Pent-4-yn-1-yl tosylate (2 equiv) was added to a mixture of a secondary amine, NaI (0.5 equiv), and  $\text{K}_2\text{CO}_3$  (3 equiv) in  $\text{CH}_3\text{CN}$  (0.5 M). The reaction was heated to reflux for 12 h and then cooled to room temperature. The reaction mixture was diluted with  $\text{CH}_2\text{Cl}_2$  (10 mL/mmol), and the solid was filtered off. The filtrate was concentrated under *vacuum*, and the residue was dissolved in  $\text{CH}_2\text{Cl}_2$ . The resulting solution was washed with 5 % of aqueous NaOH, brine, dried with anhydrous  $\text{MgSO}_4$ , and concentrated under *vacuum*. The residue was purified through silica gel flash chromatography.

***N*-Pent-4-ynylpiperidine (1)**

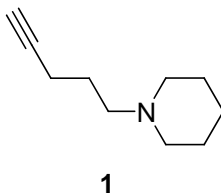

Compound **1** was prepared in 89 % yield according to the general procedure A (eluent: ethyl acetate: methanol :  $\text{NH}_4\text{OH}$  = 10: 1: 0.11).  $^1\text{H}$  NMR (400 MHz,  $\text{CDCl}_3$ )  $\delta$  2.36 – 2.39 (m, 6H), 2.21 (td, 2H,  $J$  = 7.2, 2.8 Hz), 1.94 (t, 1H,  $J$  = 2.4 Hz), 1.67 – 1.75 (m, 2H),

1.54 – 1.61 (m, 4H), 1.41 – 1.44 (m, 2H);  $^{13}\text{C}$  NMR (100 MHz,  $\text{CDCl}_3$ )  $\delta$  84.1, 68.2, 58.1, 54.5, 25.9, 25.8, 24.3, 16.4; IR (neat): 3312, 2936, 2763, 2739, 2119, 1443, 1352; MS ( $\text{ES}^+$ ) Calculated for  $[\text{C}_{10}\text{H}_{18}\text{N}]^+$ : 152.1; Found: 152.1.

***N,N*-Dibenzylpent-4-ynylamine**

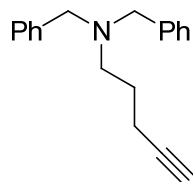

The above compound was prepared in 99 % yield according to the general procedure A (eluent: hexanes: ethyl acetate:  $\text{Et}_3\text{N}$  = 10 : 1 : 0.11).  $^1\text{H}$  NMR (400 MHz,  $\text{CDCl}_3$ )  $\delta$  7.22 – 7.36 (m, 10H), 3.55 (s, 4H), 2.50 (t, 2H,  $J$  = 6.8 Hz), 2.12 (td, 2H,  $J$  = 7.2, 2.4 Hz), 1.85 (t, 1H,  $J$  = 2.8 Hz), 1.71 – 1.74 (m, 2H);  $^{13}\text{C}$  NMR (125 MHz,  $\text{CDCl}_3$ )  $\delta$  139.6, 128.6, 128.1, 126.8, 84.5, 68.1, 58.3, 52.3, 30.9, 26.3, 16.2; IR (neat): 3298, 3085, 3062, 3027, 2949, 2797, 2117, 1494, 1452, 1366; MS ( $\text{ES}^+$ ) Calculated for  $[\text{C}_{19}\text{H}_{22}\text{N}]^+$ : 264.1; Found: 264.1.

***N,N*-Bis-[2-(tert-butyldimethylsilanyloxy)ethyl]pent-4-ynylamine**

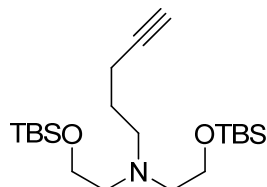

The above compound was prepared in 98 % yield according to the general procedure A (eluent: hexanes: ethyl acetate:  $\text{Et}_3\text{N}$  = 20 : 1 : 0.21).  $^1\text{H}$  NMR (500 MHz,  $\text{CDCl}_3$ )  $\delta$  3.64 (t, 4H,  $J$  = 7.0 Hz), 2.59 – 2.65 (m, 6H), 2.21 (td, 2H,  $J$  = 2.5, 3.9 Hz), 1.93 (t, 1H,  $J$  = 3.5 Hz), 1.62 – 1.68 (m, 2H), 0.89 (s, 18H), 0.02 (s, 12H);  $^{13}\text{C}$  NMR (125 MHz,  $\text{CDCl}_3$ )  $\delta$  84.5, 68.2, 62.0, 57.2, 54.3, 26.7, 25.9, 18.3, 16.0, -5.3; IR (neat): 3310, 2952, 2931, 2857, 2116, 1468; MS ( $\text{ES}^+$ ) Calculated for  $[\text{C}_{21}\text{H}_{46}\text{NO}_2\text{Si}_2]^+$ : 400.3; Found: 400.3.

***N*-Pent-4-ynylpyrrolidine**

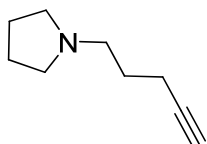

The above compound was prepared in 88 % yield according to the general procedure A (eluents: ethyl acetate : methanol : Et<sub>3</sub>N = 1 : 1 : 0.02). <sup>1</sup>H NMR (400 MHz, CDCl<sub>3</sub>) δ 2.42 – 2.48 (m, 6H), 2.18 (td, 2H, *J* = 7.2, 2.8 Hz), 1.89 (t, 1H, *J* = 2.4 Hz), 1.66 – 1.71 (m, 6H); <sup>13</sup>C NMR (125 MHz, CDCl<sub>3</sub>) δ 84.2, 68.4, 55.4, 54.2, 27.8, 23.4, 16.6; IR (neat): 3309, 2958, 2116, 1466; MS (ES<sup>+</sup>) Calculated for [C<sub>9</sub>H<sub>16</sub>N]<sup>+</sup>: 138.1; Found: 137.7.

### ***N*-Pent-4-ynylazepane**

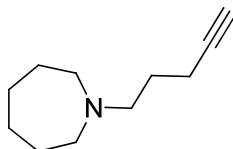

The above compound was prepared in 83 % yield according to the general procedure A (eluents: hexanes: ethyl acetate: Et<sub>3</sub>N = 10: 1 : 0.11). <sup>1</sup>H NMR (400 MHz, CDCl<sub>3</sub>) δ 2.62 (t, 4H, *J* = 4.8 Hz), 2.55 (t, 2H, *J* = 7.2 Hz), 2.22 (td, 2H, *J* = 7.2, 2.8 Hz), 1.94 (t, 1H, *J* = 2.8 Hz), 1.59 – 1.70 (m, 10H); <sup>13</sup>C NMR (125 MHz, CDCl<sub>3</sub>) δ 84.5, 68.1, 56.9, 55.4, 28.1, 27.0, 26.6, 16.3; IR (neat): 3310, 2926, 2857, 2815, 2778, 2116, 1458; MS (ES<sup>+</sup>) Calculated for [C<sub>11</sub>H<sub>20</sub>N]<sup>+</sup>: 166.2; Found: 166.2.

### ***N*-Methyl-*N*-octylpent-4-ynylamine**

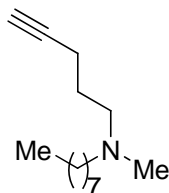

The above compound was prepared in 78 % yield according to the general procedure A (eluents: ethyl acetate : methanol: NH<sub>4</sub>OH = 10 : 1 : 0.11). <sup>1</sup>H NMR (400 MHz, CDCl<sub>3</sub>) δ 2.40 (t, 2H, *J* = 7.2 Hz), 2.28 (t, 2H, *J* = 3.6 Hz), 2.20 – 2.24 (m, 5H), 1.94 (t, 1H, *J* = 2.4 Hz), 1.62 – 1.72 (m, 2H), 1.40 – 1.49 (m, 2H), 1.20 – 1.34 (m, 10H), 0.87 (t, 3H, *J* = 6.4 Hz), ; <sup>13</sup>C NMR (125 MHz, CDCl<sub>3</sub>) δ 84.2, 68.1, 57.8, 56.3, 42.2, 31.7, 29.5, 29.2, 27.4,

27.2, 26.2, 22.5, 16.2, 14.0; IR (neat):3310, 2926, 2857, 2794, 2121, 1463; MS ( $\text{ES}^+$ )  
Calculated for  $[\text{C}_{14}\text{H}_{28}\text{N}]^+$ : 210.2; Found: 210.2.

***N*-Benzyl-*N*-methylpent-4-ynylamine**

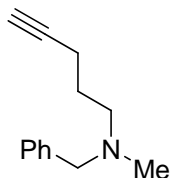

The above compound was prepared in 85 % yield according to the general procedure A (eluent: hexanes : ethyl acetate :  $\text{Et}_3\text{N}$  = 5 : 1 : 0.06).  $^1\text{H}$  NMR (400 MHz,  $\text{CDCl}_3$ )  $\delta$  7.20 – 7.34 (m, 5H), 3.49 (s, 2H), 2.47 (t, 2H,  $J$  = 6.8 Hz), 2.25 (td, 2H,  $J$  = 7.2, 2.8 Hz), 2.19 (s, 3H), 1.93 (t, 1H,  $J$  = 2.8 Hz), 1.70 – 1.78 (m, 2H);  $^{13}\text{C}$  NMR (125 MHz,  $\text{CDCl}_3$ )  $\delta$  139.2, 128.9, 128.1, 126.8, 84.4, 68.2, 62.3, 56.1, 42.1, 26.4, 16.2; IR (neat): 3302, 2949, 2838, 2790, 2117, 1494, 1453, 1365; MS ( $\text{ES}^+$ ) Calculated for  $[\text{C}_{13}\text{H}_{18}\text{N}]^+$ : 188.1; Found: 188.1.

***N*-Benzyl-*N*-butylpent-4-ynylamine**

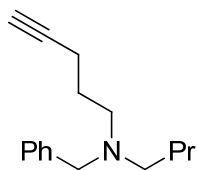

The above compound was prepared in 93 % yield according to the general procedure A (eluent: hexanes : ethyl acetate :  $\text{Et}_3\text{N}$  = 10 : 1 : 0.11).  $^1\text{H}$  NMR (500 MHz,  $\text{CDCl}_3$ )  $\delta$  7.23- 7.35 (m, 5H), 3.56 (s, 2H), 2.52 (t, 2H,  $J$  = 6.5 Hz), 2.43 (t, 2H,  $J$  = 5.5 Hz), 2.23 (td, 2H,  $J$  = 7.0, 2.5 Hz), 1.92 (t, 1H,  $J$  = 2.5 Hz), 1.67 – 1.73 (m, 2H), 1.44 – 1.50 (m, 2H), 1.29 – 1.34 (m, 2H), 0.90 (t, 3H,  $J$  = 7.5 Hz);  $^{13}\text{C}$  NMR (125 MHz,  $\text{CDCl}_3$ )  $\delta$  140.1, 128.7, 128.0, 126.6, 84.5, 68.1, 58.7, 53.5, 52.5, 29.2, 26.3, 20.5, 16.2, 14.0; IR (neat):3309, 3027, 2955, 2933, 2799, 2118, 1495, 1453; MS ( $\text{ES}^+$ ) Calculated for  $[\text{C}_{16}\text{H}_{24}\text{N}]^+$ : 230.2; Found: 230.2.

***N*-(2-Bromobenzyl)-*N*-butylpent-4-ynylamine**

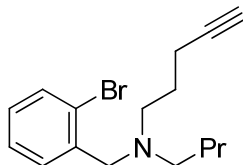

The above compound was prepared in 91 % yield according to the general procedure A (eluent: hexanes: ethyl acetate: Et<sub>3</sub>N = 10 : 1 : 0.11). <sup>1</sup>H NMR (400 MHz, CDCl<sub>3</sub>) δ 7.50 – 7.54 (m, 2H), 7.27 (t, 1H, *J* = 6.0 Hz), 7.09 (t, 1H, *J* = 5.6 Hz), 3.63 (s, 2H), 2.56 (t, 2H, *J* = 5.6 Hz), 2.45 (t, 2H, *J* = 5.6 Hz), 2.22 (td, 2H, *J* = 5.6, 2.0 Hz), 1.90 (t, 1H, *J* = 2.4), 1.63 – 1.71 (m, 2H), 1.43 – 1.49 (m, 2H), 1.26 – 1.34 (m, 2H), 0.87 (t, 3H, *J* = 6.4 Hz); <sup>13</sup>C NMR (125 MHz, CDCl<sub>3</sub>) δ 139.3, 132.5, 130.5, 127.9, 127.1, 124.1, 84.5, 68.2, 58.3, 53.9, 52.8, 29.3, 26.4, 20.6, 16.3, 14.0; IR (neat): 3305, 2952, 2931, 2857, 2799, 2121, 1463; MS (ES<sup>+</sup>) Calculated for [C<sub>16</sub>H<sub>23</sub>BrN]<sup>+</sup>: 308.1; Found: 308.1.

## 2-(Pent-4-ynyl)-1,2,3,4-tetrahydroisoquinoline

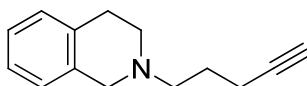

The above compound was prepared in 80 % yield according to the general procedure A (eluent: hexanes : ethyl acetate : Et<sub>3</sub>N = 20 : 1 : 0.21). <sup>1</sup>H NMR (500 MHz, CDCl<sub>3</sub>) δ 7.00 – 7.13 (m, 4H), 3.63 (s, 2H), 2.90 (t, 2H, *J* = 5.5 Hz), 2.74 (t, 2H, *J* = 6.0 Hz), 2.61 (t, 2H, *J* = 7.5 Hz), 2.29 (td, 2H, *J* = 2.5, 7.0 Hz), 1.96 (t, 1H, *J* = 2.5 Hz), 1.81 – 1.86 (m, 2H); <sup>13</sup>C NMR (125 MHz, CDCl<sub>3</sub>) δ 134.8, 134.3, 128.6, 126.5, 126.0, 125.5, 84.2, 68.4, 57.0, 56.2, 50.9, 29.1, 26.1, 16.3; IR (neat): 3296, 3021, 2921, 2804, 2768, 2116, 1498, 1466, 1376; MS (ES<sup>+</sup>) Calculated for [C<sub>14</sub>H<sub>18</sub>N]<sup>+</sup>: 200.1; Found: 200.2.

## *N*-Benzyl-*N*-(4-methoxybenzyl)pent-4-ynylamine

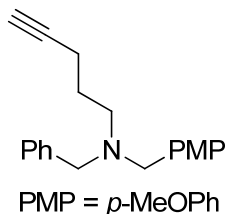

The above compound was prepared in 99 % yield according to the general procedure A (eluents: hexanes: ethyl acetate: Et<sub>3</sub>N = 10 : 1 : 0.11). <sup>1</sup>H NMR (400 MHz, CDCl<sub>3</sub>) δ 7.22- 7.35 (m, 7H), 6.84 (d, 2H, *J* = 8.4 Hz), 3.79 (s, 3H), 3.53 (s, 2H), 3.49 (s, 2H), 2.48 (t, 2H, *J* = 7.2 Hz), 2.18 (td, 2H, *J* = 7.6, 2.8 Hz), 1.86 (t, 1H, *J* = 2.4 Hz), 1.68 – 1.75 (m, 2H); <sup>13</sup>C NMR (125 MHz, CDCl<sub>3</sub>) δ 158.4, 139.6, 131.3, 129.7, 128.6, 128.0, 126.6, 113.4, 84.3, 68.2, 58.0, 57.5, 55.0, 52.0, 26.2, 16.1; IR (neat): 3294, 2931, 2831, 2794, 2115, 1610, 1515, 1463; MS (ES<sup>+</sup>) Calculated for [C<sub>20</sub>H<sub>23</sub>NO+H]<sup>+</sup>: 294.2; Found: 294.2.

### Ethyl butylpent-4-ynylaminoacetate

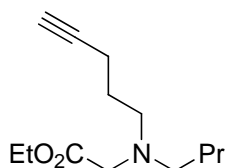

The above compound was prepared in 90 % yield according to the general procedure A (eluents: ethyl acetate : methanol : NH<sub>4</sub>OH = 10 : 1 : 0.11). <sup>1</sup>H NMR (500 MHz, CDCl<sub>3</sub>) δ 4.13 (dd, 2H, *J* = 14.0, 7.5 Hz), 3.29 (s, 2H), 2.66 (t, 2H, *J* = 6.5 Hz), 2.54 (t, 2H, *J* = 8.0 Hz), 2.21 (td, 2H, *J* = 2.5, 7.0 Hz), 1.92 (t, 1H, *J* = 2.5 Hz), 1.62 – 1.67 (m, 2H), 1.39 – 1.43 (m, 2H), 1.23 – 1.31 (m, 5H), 0.88 (t, 3H, *J* = 7.0 Hz); <sup>13</sup>C NMR (125 MHz, CDCl<sub>3</sub>) δ 171.6, 84.3, 68.2, 60.1, 55.1, 54.0, 53.1, 29.7, 26.6, 20.4, 16.0, 14.2, 13.9; IR (neat): 3308, 2956, 2933, 2861, 2117, 1738, 1457; MS (ES<sup>+</sup>) Calculated for [C<sub>13</sub>H<sub>24</sub>NO<sub>2</sub>]<sup>+</sup>: 226.2; Found: 226.2.

### 2-Methyl-1-(pent-4-ynyl)piperidine

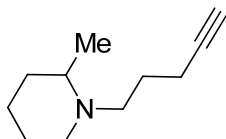

The above compound was prepared in 87 % yield according to the general procedure A (eluents: hexanes : ethyl acetate= 10: 1, then hexanes : ethyl acetate : Et<sub>3</sub>N = 4 : 1 : 0.05). <sup>1</sup>H NMR (400 MHz, CDCl<sub>3</sub>) δ 2.72 – 2.87 (m, 2H), 2.40 – 2.47 (m, 1H), 2.13 – 2.30 (m, 4H), 1.94 (t, 1H, *J* = 2.8 Hz), 1.51 – 1.72 (m, 6H), 1.26 – 1.31 (m, 2H), 1.07 (d, 3H, *J* = 6.4 Hz); <sup>13</sup>C NMR (125 MHz, CDCl<sub>3</sub>) δ 84.3, 68.3, 55.8, 52.8, 52.2, 34.6, 26.1, 24.5,

24.0, 19.1, 16.5; IR (neat): 3309, 2937, 2858, 2118, 1469, 1378; MS ( $\text{ES}^+$ ) Calculated for  $[\text{C}_{11}\text{H}_{20}\text{N}]^+$ : 166.2; Found: 165.9

#### 4-Methyl-1-(pent-4-ynyl)piperidine

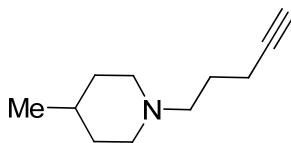

The above compound was prepared in 84 % yield according to the general procedure A (eluents: hexanes : ethyl acetate :  $\text{Et}_3\text{N}$  = 3 : 1 : 0.04).  $^1\text{H}$  NMR (500 MHz,  $\text{CDCl}_3$ )  $\delta$  2.86 (d, 2H,  $J$  = 11.5 Hz), 2.39 (m, 2H), 2.21 (td, 2H,  $J$  = 7.0, 2.5 Hz), 1.88 – 1.94 (m, 3H), 1.69 – 1.75 (m, 2H), 1.59 – 1.62 (m, 2H), 1.32 – 1.36 (m, 1H), 1.19 – 1.27 (m, 2H), 0.91 (d, 3H,  $J$  = 11.5 Hz);  $^{13}\text{C}$  NMR (125 MHz,  $\text{CDCl}_3$ )  $\delta$  84.3, 68.3, 57.9, 54.0, 34.3, 30.8, 26.0, 21.9, 16.6, 16.5; IR (neat): 3310, 2947, 2926, 2116, 1452; MS ( $\text{ES}^+$ ) Calculated for  $[\text{C}_{11}\text{H}_{20}\text{N}]^+$ : 166.2; Found: 165.9.

#### Methyl 1-(pent-4-ynyl)pyrrolidine-2-carboxylate

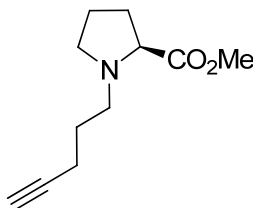

The above compound was prepared in 90 % yield according to the general procedure A using methyl proline hydrochloride as the starting material (eluents: ethyl acetate : methanol :  $\text{NH}_4\text{OH}$  = 9 : 1 : 0.1).  $^1\text{H}$  NMR (500 MHz,  $\text{CDCl}_3$ )  $\delta$  3.68 (s, 3H), 3.11 – 3.15 (m, 2H), 2.69 – 2.75 (m, 1H), 2.44 – 2.49 (m, 1H), 2.29 – 2.34 (m, 1H), 2.18 – 2.23 (m, 2H), 2.05 – 2.09 (m, 1H), 1.87 – 1.91 (m, 3H), 1.75 – 1.80 (m, 1H), 1.65 – 1.71 (m, 2H);  $^{13}\text{C}$  NMR (125 MHz,  $\text{CDCl}_3$ )  $\delta$  174.7, 84.0, 68.3, 66.0, 53.7, 53.4, 51.7, 29.2, 27.5, 23.2, 16.3; IR (neat): 3304, 3053, 2953, 2811, 2117, 1742, 1435; MS ( $\text{ES}^+$ ) Calculated for  $[\text{C}_{11}\text{H}_{18}\text{NO}_2]^+$ : 196.1; Found: 196.1.

#### Preparation of *N*-benzyl-*N*-(2-ethylpent-4-ynyl)methylamine (7)

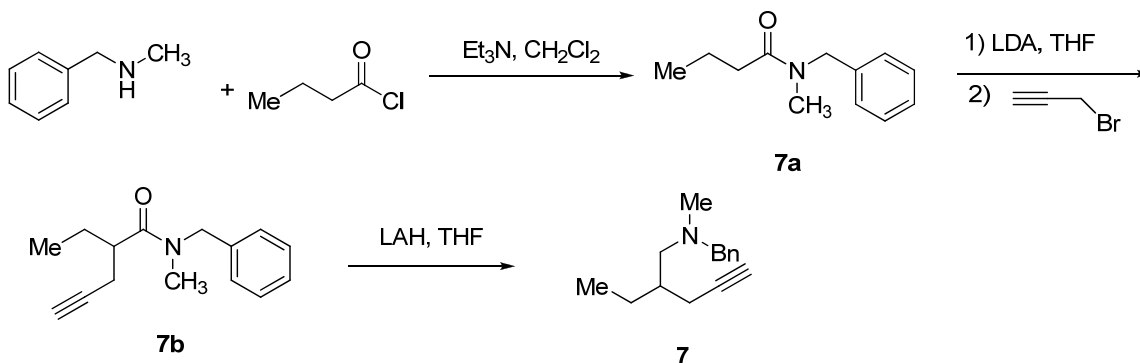

Benzylmethylamine (3.87 mL, 30 mmol) and  $\text{NEt}_3$  (4.9 mL, 35 mmol) in  $\text{CH}_2\text{Cl}_2$  (40 mL) was added dropwise to a solution of butyryl chloride (3.6 mL, 35 mmol) in  $\text{CH}_2\text{Cl}_2$  (20 mL) at 0 °C. The mixture was stirred at room temperature for 5 h. The reaction mixture was treated with aqueous  $\text{NH}_4\text{Cl}$  (1N, 20 mL) and was extracted with  $\text{CH}_2\text{Cl}_2$  (3 x 30 mL). The combined organic phase was dried and concentrated. The residue was purified through silica gel flash chromatography (eluent: hexanes : ethyl acetate = 5 : 1) to give compound **7a** (5.73 g, 28.5 mmol) in 95% yield.

At -78 °C, a solution of amide **7a** (2.0 g, 10.5 mmol) in THF (10 mL) was added dropwise to a THF solution of LDA (50 mL, 0.25 M in THF). The resulting mixture was stirred at -78 °C for 2 h before the addition of propargyl bromide (1.12 mL, 12.6 mmol). The reaction mixture was allowed to warm to room temperature overnight. The mixture was quenched by 1 N  $\text{NH}_4\text{Cl}$  (20 mL) and extracted with  $\text{Et}_2\text{O}$  (3 x 30 mL). The combined organic phases were washed with brine, dried with anhydrous  $\text{MgSO}_4$  and filtered. The filtrate was concentrated, and the resulting residue was purified through silica gel flash column (eluent: hexanes: ethyl acetate = 10:1) to afford amide **7b** (1.88 g, 8.19 mmol) in 78 % yield.

To a solution of compound **7b** (1.306 g, 5.6 mmol) in THF (75 mL) was added LAH (0.64 g, 16.8 mmol) at 0 °C. The resulting mixture was refluxed overnight and then diluted with ether (50 mL). Upon cooling to 0 °C, the reaction mixture was treated dropwise and sequentially with 0.64 mL water, 0.64 mL 15 % aqueous sodium hydroxide and 1.92 mL water and then stirred at room temperature for 15 min. After removal of the white solids via filtration, the filtrate was concentrated, and the resulting residue was

purified through silica gel flash column (eluents: hexanes: ethyl acetate : Et<sub>3</sub>N = 10 : 1 : 0.11) to afford tertiary amine **7** (0.71 g, 3.30 mmol) in 59 % yield. <sup>1</sup>H NMR (400 MHz, CDCl<sub>3</sub>) δ 7.24 – 7.35 (m, 5H), 3.54 (d, 1H, *J* = 13.0 Hz), 3.46 (d, 1H, *J* = 13.0 Hz), 2.25 – 2.40 (m, 4H), 2.18 (s, 3H), 1.91 (td, 1H, *J* = 3.0 Hz), 1.73 (m, 1H), 1.48 (m, 2H), 0.94 (t, 3H, *J* = 7.5 Hz); <sup>13</sup>C NMR (125 MHz, CDCl<sub>3</sub>) δ 139.5, 128.9, 128.1, 126.8, 83.0, 69.0, 62.9, 60.9, 42.5, 36.9, 24.2, 20.5, 11.1; IR (neat): 3307, 2963, 2841, 2794, 2114, 1454, 1380; MS (ES<sup>+</sup>) Calculated for [C<sub>15</sub>H<sub>22</sub>N]<sup>+</sup>: 216.2; Found: 216.2.

### Preparation of *N*-benzyl-*N*-(1-but-3-ynylheptyl)methylamine (**9**)

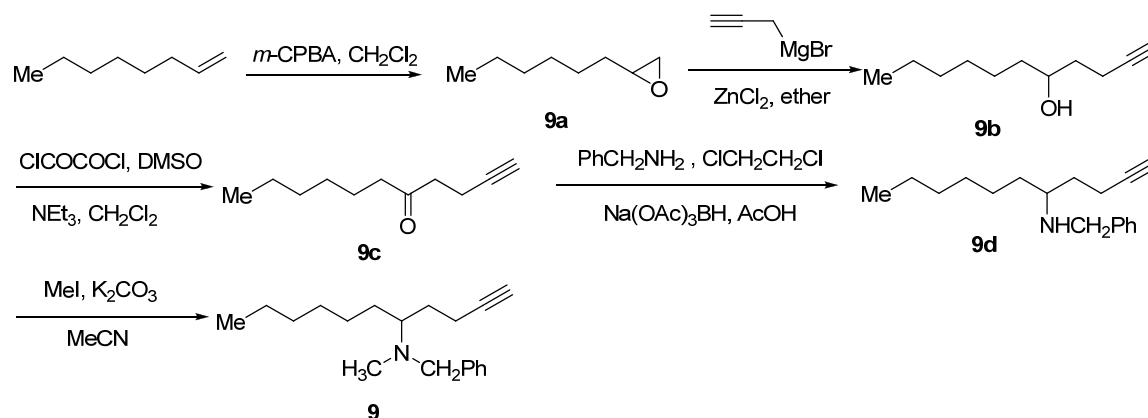

*m*-CPBA (4.93 g, 22 mmol) was added to a solution of 1-octene (2.24 g, 20 mmol) in H<sub>2</sub>O (20 mL) at 0 °C. The reaction was vigorously stirred at 0 °C for 4 h and at room temperature for 2 h. The reaction mixture was extracted twice with diethyl ether (2 x 100 mL). The combined organic phases were washed sequentially with a cooled solution of 10% NaOH (20 mL) and saturated brine (20 mL) and dried with Na<sub>2</sub>SO<sub>4</sub>. Subsequent filtration and concentration afford practically pure **9a** (1.72 g, 13.4 mmol) in 67% yield.

To a solution of **9a** (1.0 g, 5.8 mmol) and ZnCl<sub>2</sub> (79 mg, 0.58 mmol) in diethyl ether (6 mL) at -78 °C was added propargylmagnesium bromide (20 mL, 1 M solution in diethyl ether, 20 mmol). The reaction was slowly warmed to room temperature and further stirred for 6 h. The reaction was then quenched with aq. NH<sub>4</sub>Cl (20 mL), and the resulting mixture was extracted with diethyl ether (50 mL x 2). The combined organic phases were dried (Na<sub>2</sub>SO<sub>4</sub>) and filtered. The filtrate was concentrated to afford alcohol **9b** (1.1g), which was used in the next step without further purification.

A solution of dry DMSO (1.0 g, 12.7 mmol) in  $\text{CH}_2\text{Cl}_2$  (5 mL) was added dropwise to a stirred solution of oxalyl chloride (0.36 g, 6.4 mmol) in  $\text{CH}_2\text{Cl}_2$  (15 mL) under  $\text{N}_2$  at  $-78^\circ\text{C}$ . The solution was stirred for 0.5 h before the slow addition of a solution of **9b** (0.974 g, 5.8 mmol) in  $\text{CH}_2\text{Cl}_2$  (10 mL). The reaction mixture was stirred for 1 h at  $-78^\circ\text{C}$  and then treated drop-wise with  $\text{NEt}_3$  (4 mL, 29 mmol). The reaction mixture was warmed to room temperature over 0.5 h before addition of water (30 mL). The mixture was extracted with  $\text{CH}_2\text{Cl}_2$  ( $3 \times 50$  mL), and the combined organic phases were washed with brine, dried ( $\text{MgSO}_4$ ) and filtered. The filtrate was concentrated under *vacuum*. The resulting residue was purified through silica gel flash column (eluent: hexanes: ethyl acetate = 5:1) to afford ketone **9c** (0.65 g, 3.89 mmol) in 67 % yield.

Benzylamine (0.197 g, 1.84 mmol) and ketone **9c** (0.278 g, 1.67 mmol) were mixed in 1,2-dichloroethane (10 mL) and then treated with sodium triacetoxyborohydride (0.7 g, 3.32 mmol) and AcOH (0.5 mL) at  $0^\circ\text{C}$ . The mixture was stirred at room temperature for 12 h. The reaction mixture was quenched by the addition of 1 N aqueous NaOH (10 mL) and then extracted with  $\text{CH}_2\text{Cl}_2$  ( $3 \times 20$  mL). The organic phases were combined and washed with brine and dried ( $\text{MgSO}_4$ ). Upon filtration, the filtrate was evaporated to give amine **9d** (0.357 g, 1.39 mmol, 83% yield), which was used in the next step without further purification.

MeI (0.088 mL, 1.42 mmol) was added to a mixture of a **9d** (0.303 g, 1.18 mmol),  $\text{K}_2\text{CO}_3$  (0.85 g, 4.72 mmol) in  $\text{CH}_3\text{CN}$  (30 mL). The reaction was heated to reflux for 4 h and then the reaction was cooled to room temperature. The reaction mixture was diluted with  $\text{CH}_2\text{Cl}_2$  (20 mL), and the solids were filtered off. The filtrate was washed with 5 % of aqueous NaOH (15 mL), brine, and dried with anhydrous  $\text{MgSO}_4$ , and filtered. The filtrate was concentrated under *vacuum*. The residue was purified through silica gel flash column (eluent: hexanes: ethyl acetate :  $\text{Et}_3\text{N}$  = 5:1:0.06) to afford tertiary amine **9** (0.288 g, 1.06 mmol) in 90 % yield.  $^1\text{H}$  NMR (500 MHz,  $\text{CDCl}_3$ )  $\delta$  7.24 – 7.36 (m, 5H), 3.62 (d, 1H,  $J$  = 13.5 Hz), 3.56 (d, 1H,  $J$  = 13.5 Hz), 2.62 – 2.65 (m, 1H), 2.28 – 2.40 (m, 2H), 2.15 (s, 3H), 1.96 (t, 1H,  $J$  = 2.5 Hz), 1.59 – 1.74 (m, 3H), 1.24 – 1.38 (m, 9H),

0.94 (t, 3H,  $J = 7.0$  Hz);  $^{13}\text{C}$  NMR (125 MHz,  $\text{CDCl}_3$ )  $\delta$  140.5, 128.5, 128.1, 126.6, 85.0, 68.0, 61.6, 58.1, 35.9, 31.8, 29.7, 29.5, 28.6, 27.2, 22.6, 16.1, 14.1; IR (neat): 3310, 2931, 2857, 2789, 2121, 1457; MS ( $\text{ES}^+$ ) Calculated for  $[\text{C}_{19}\text{H}_{30}\text{N}]^+$ : 272.2; Found: 272.2.

### Preparation of *N*-benzyl-*N*-(3-ethynyloctyl)methylamine (**11**)

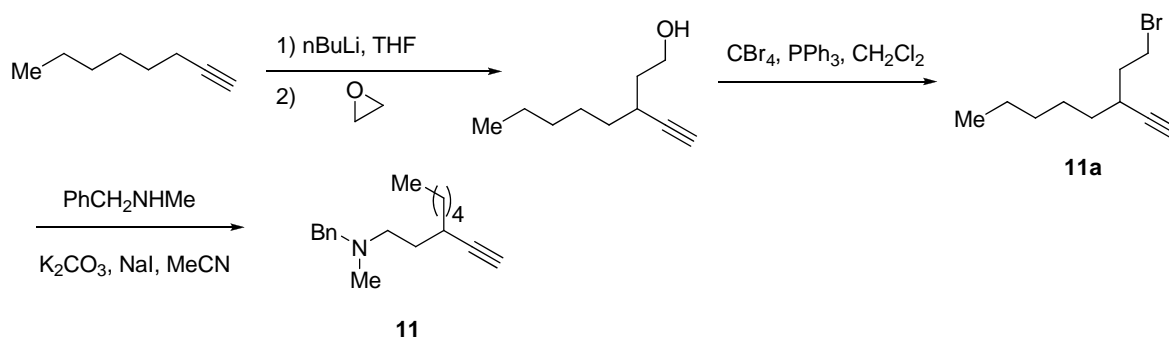

3-Pentyl-4-pentyn-1-ol was synthesized according to the literature procedure (Miura, K.; Wang, D.; Matsumoto, Y.; Hosomi, A. *Org. Lett.* **2005**, 7, 503-505). 3-Pentyl-4-pentyn-1-ol (0.820 g, 5.32 mmol),  $\text{CBr}_4$  (3.182 g, 9.58 mmol), and 2,6-lutidine (3.03 mL, 26.1 mmol) were mixed at 0 °C in  $\text{CH}_2\text{Cl}_2$  (30 mL) and then treated drop-wise with a solution of  $\text{PPh}_3$  (2.788 g, 10.64 mmol) in  $\text{CH}_2\text{Cl}_2$  (10 mL). The reaction mixture was stirred for 5 h prior to concentration, addition of ether, and removal of solid by filtration through Celite. The solution was washed with 1N HCl, dried with anhydrous  $\text{MgSO}_4$ , and concentrated. The residue was purified through silica gel flash chromatography (eluent: hexanes: ethyl acetate :  $\text{Et}_3\text{N} = 5 : 1 : 0.06$ ) to give bromide **11a** which used directly in the next step.

Compound **11a** was added to a mixture of benzylmethyl amine (0.752 mL, 5.83 mmol), NaI (0.40 g, 2.67 mmol), and  $\text{K}_2\text{CO}_3$  (3.8 g, 21.1 mmol) in  $\text{CH}_3\text{CN}$  (50 mL). The reaction was heated to reflux for 12 h and then cooled to room temperature. The reaction mixture was diluted with  $\text{CH}_2\text{Cl}_2$  (50 mL), and the solids were filtered off. The filtrate was concentrated under *vacuum*. The residue was dissolved in  $\text{CH}_2\text{Cl}_2$ , and washed with 5 % aqueous NaOH. The organic layer was dried with anhydrous  $\text{MgSO}_4$  and concentrated under *vacuum*. The residue was purified through silica gel flash chromatography (eluent:

hexanes : ethyl acetate : Et<sub>3</sub>N = 3 : 1 : 0.04) to yield tertiary amine **11** in 79% yield in two steps. <sup>1</sup>H NMR (400 MHz, CDCl<sub>3</sub>) δ 7.24 – 7.33 (m, 5H), 3.47 – 3.55 (m, 2H), 2.55 (t, 2H, *J* = 7.2 Hz), 2.43 – 2.49 (m, 1H), 2.20 (s, 3H), 2.02 (t, 1H, *J* = 2.4 Hz), 1.28 – 1.71 (m, 10H), 0.91 (t, 3H, *J* = 6.8 Hz); <sup>13</sup>C NMR (125 MHz, CDCl<sub>3</sub>) δ 139.3, 129.2, 128.3, 127.0, 88.0, 69.3, 62.6, 55.4, 42.4, 35.0, 32.9, 31.8, 29.5, 27.0, 22.7, 14.2; IR (neat): 3305, 2931, 2857, 2789, 2110, 1455; MS (ES<sup>+</sup>) Calculated for [C<sub>18</sub>H<sub>28</sub>N]<sup>+</sup>: 258.2; Found: 258.2.

### General procedure B: Preparation of Azepan-4-ones

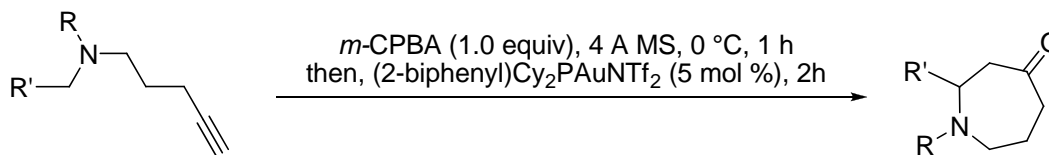

*m*-CPBA (1.0 equiv) was added into a mixture of a pent-4-yn-1-ylamine and 4 Å MS (5 x weight of *m*-CPBA) in CH<sub>2</sub>Cl<sub>2</sub> (0.05 M) under N<sub>2</sub> at 0 °C. The *N*-oxide formation was monitored by TLC. Upon completion (~1 h), (2-biphenyl)Cy<sub>2</sub>PAuNTf<sub>2</sub> (5 mol %) was added and the reaction mixture was stirred at 0 °C until all the *N*-oxide was consumed (~2 h). The reaction mixture was diluted with CH<sub>2</sub>Cl<sub>2</sub>, and the molecular sieves were filtered off. The filtrate was washed with 5 % aqueous Na<sub>2</sub>CO<sub>3</sub>, dried with Na<sub>2</sub>SO<sub>4</sub>, and concentrated under *vacuum*. The residue was purified through silica gel flash chromatography.

### Octahydropyrido[1,2-*a*]azepin-9-one (**2**)

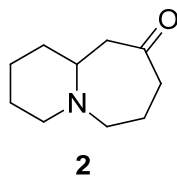

Compound **2** was prepared in 79 % yield according to the general procedure B. The reaction times are 1 h for the formation of *N*-oxide and 2 h for Au catalysis. The residue was purified through silica gel flash chromatography (eluent: ethyl acetate: methanol : NH<sub>4</sub>OH = 2: 1: 0.03). <sup>1</sup>H NMR (400 MHz, CDCl<sub>3</sub>) δ 3.03 (dd, 1H, *J* = 7.6, 13.6 Hz), 2.86 – 2.94 (m, 2H), 2.55 (dt, 1H, *J* = 5.0, 16.8 Hz), 2.02– 2.42 (m, 6H), 1.89 – 1.96 (m,

1H), 1.55 – 1.73 (m, 4H), 1.35 – 1.45 (m, 1H), 1.24 – 1.32 (m, 1H);  $^{13}\text{C}$  NMR (125 MHz,  $\text{CDCl}_3$ )  $\delta$  212.8, 60.9, 59.5, 56.8, 51.5, 42.3, 34.8, 25.6, 24.0, 23.0; IR (neat): 2934, 2807, 2770, 1707, 1444, 1348; MS ( $\text{ES}^+$ ) Calculated for  $[\text{C}_{10}\text{H}_{18}\text{NO}]^+$ : 168.1; Found: 167.9.

#### Decahydropyrido[1,2-a]azepine (4)

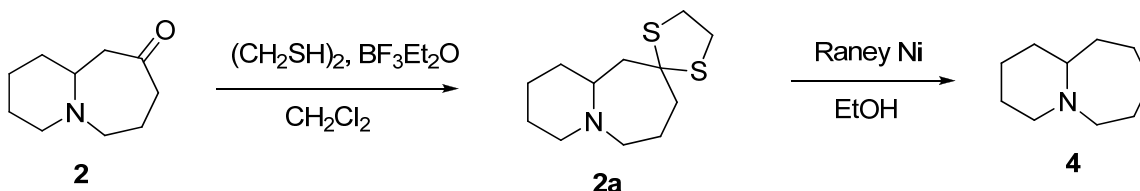

To a solution of **2** (55.1 mg, 0.33 mmol) in dry  $\text{CH}_2\text{Cl}_2$  (6 mL) was added 1,2-ethanedithiol (0.27 mL, 10 equiv) and boron trifluoride etherate (0.103 mL, 2.5 equiv). The mixture was stirred for 2 h and then quenched with 1 N NaOH (5 mL). The aqueous phase was extracted with  $\text{CH}_2\text{Cl}_2$  (3 x 10 mL). The combined organic layers were washed with 1 N NaOH (5 mL), dried  $\text{Na}_2\text{SO}_4$  and concentrated. The crude product was purified by silica column chromatography (eluents: ethyl acetate: methanol :  $\text{NH}_4\text{OH}$  = 1: 1: 0.02) to give **2a** (62.4 mg, 0.26 mmol) in 78% yield.

To a solution of **2a** (62.4 mg, 0.26 mmol) in absolute methanol (5 mL) was added Raney nickel (1.8 g) under  $\text{H}_2$  atmosphere and heated to reflux for 2 h. The reaction mixture was filtered through Celite and washed with diethyl ether. The filtrate was concentrated and purified by silica column chromatography (eluents: ethyl acetate: methanol :  $\text{Et}_3\text{N}$  = 1: 3: 0.04) to give **4** (41.1 mg, 0.17 mmol) in 65% yield.  $^1\text{H}$  NMR (500 MHz,  $\text{CDCl}_3$ )  $\delta$  2.84 (d, 1H,  $J$  = 11.0 Hz), 2.72 – 2.74 (m, 1H), 2.47 (t, 1H,  $J$  = 12.5 Hz), 2.22 – 2.27 (m, 1H), 1.96 – 2.40 (m, 1H), 1.67 – 1.76 (m, 4H), 1.49– 1.66 (m, 8H), 1.30 – 1.42 (m, 1H), 1.21 – 1.28 (m, 1H);  $^{13}\text{C}$  NMR (125 MHz,  $\text{CDCl}_3$ )  $\delta$  65.6, 57.5, 35.4, 34.4, 27.1, 26.8, 26.1, 24.9, 24.5; IR (neat): 2930, 2854, 2762, 1467, 1442, 1367; MS ( $\text{ES}^+$ ) Calculated for  $[\text{C}_{10}\text{H}_{20}\text{N}]^+$ : 154.2; Found: 154.2.

#### *N*-Benzyl-2-phenylazepan-4-one (6a)

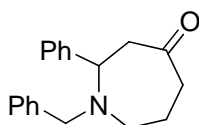

**6a**

Compound **6a** was prepared in 87 % yield according to the general procedure B. The reaction times are 1 h for the formation of N-oxide and 2 h for Au catalysis. The residue was purified through silica gel flash chromatography (eluents: hexanes : ethyl acetate : NEt<sub>3</sub> = 10 : 1 : 0.11). <sup>1</sup>H NMR (500 MHz, CDCl<sub>3</sub>) δ 7.44 (d, 2H, *J* = 9.0 Hz), 7.37 (t, 2H, *J* = 7.0 Hz), 7.20 – 7.30 (m, 6H), 4.00 (dd, 1H, *J* = 4.0, 9.5 Hz), 3.61 (d, 1H, *J* = 13.5 Hz), 3.34 (d, 1H, *J* = 14.0 Hz), 3.09 – 3.36 (m, 2H), 2.77 (dd, 1H, *J* = 4.5, 14.0 Hz), 2.51 – 2.60 (m, 3H), 1.97 – 2.01 (m, 1H), 1.85 – 1.90 (m, 1H); <sup>13</sup>C NMR (125 MHz, CDCl<sub>3</sub>) δ 211.9, 142.4, 139.5, 128.6, 128.4, 128.3, 128.2, 127.4, 126.9, 64.2, 57.1, 50.9, 49.0, 42.4, 22.2 ; IR (neat): 3084, 3061, 3027, 2935, 2810, 1705, 1494, 1451; MS (ES<sup>+</sup>) Calculated for [C<sub>19</sub>H<sub>21</sub>NNaO]<sup>+</sup>: 302.2; Found: 302.2.

***N*-[2-(tert-Butyldimethylsilanyloxy)ethyl]-2-(tert-butyldimethylsilanyloxymethyl)azepan-4-one (**6b**)**

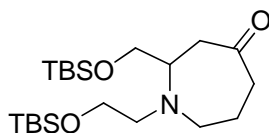

**6b**

Compounds **6b** were prepared in 51 % yield according to the general procedure B. The reaction time is 1 h for the formation of *N*-oxide and 8 h for Au catalysis. The residue was purified through silica gel flash chromatography (eluents: hexanes : ethyl acetate : Et<sub>3</sub>N = 10 : 1 : 0.11). <sup>1</sup>H NMR (500 MHz, CDCl<sub>3</sub>) δ 3.70 (dd, 1H, *J* = 5.2, 9.6 Hz), 3.57 (t, 2H, *J* = 6.4 Hz), 3.47 – 3.51 (m, 1H), 3.17 – 3.26 (m, 2H), 2.84 – 2.91 (m, 1H), 2.57 – 2.72 (m, 5H), 2.41 – 2.47 (m, 1H), 1.84 – 1.93 (m, 1H), 1.59 (m, 1H), 0.88 (s, 18H), 0.04 (s, 12H); <sup>13</sup>C NMR (125 MHz, CDCl<sub>3</sub>) δ 213.0, 64.9, 62.8, 60.0, 52.9, 51.5, 44.7, 42.9, 25.9, 25.8, 21.8, 18.3, 18.2, –5.3, –5.4, –5.5; IR (neat): 2953, 2929, 2857, 1705, 1646, 1471; MS (ES<sup>+</sup>) Calculated for [C<sub>21</sub>H<sub>46</sub>NO<sub>3</sub>Si<sub>2</sub>]<sup>+</sup>: 416.3; Found: 416.3.

**Hexahydropyrrolo[1,2-a]azepin-8-one (**6c**)**

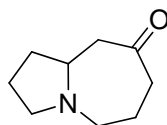

**6c**

Compounds **6c** were prepared in 80 % yield according to the general procedure B. The reaction time is 1 h for the formation of *N*-oxide and 2 h for Au catalysis. The residue was purified through silica gel flash chromatography (eluents: ethyl acetate : methanol : NH<sub>4</sub>OH = 5 : 1 : 0.06). <sup>1</sup>H NMR (400 MHz, CDCl<sub>3</sub>) δ 3.28 – 3.33 (m, 1H), 3.17 – 3.22 (m, 1H), 2.26 – 2.71 (m, 7H), 1.83 – 2.06 (m, 4H), 1.68 – 1.75 (m, 1H), 1.55 – 1.61 (m, 1H); <sup>13</sup>C NMR (125 MHz, CDCl<sub>3</sub>) δ 212.2, 60.4, 57.3, 56.6, 50.0, 43.2, 32.8, 24.3, 21.8; IR (neat): 2930, 2853, 1708, 1556, 1376, 1352; MS (ES<sup>+</sup>) Calculated for [C<sub>9</sub>H<sub>16</sub>NO]<sup>+</sup>: 154.1; Found: 153.8.

**Octahydroazepino[1,2-a]azepin-2-one (6d)**

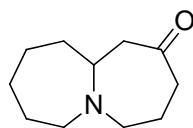

**6d**

Compounds **6d** were prepared in 89 % yield according to the general procedure B. The reaction time is 1 h for the formation of *N*-oxide and 2 h for Au catalysis. The residue was purified through silica gel flash chromatography (eluents: hexanes: ethyl acetate: Et<sub>3</sub>N = 1 : 1 : 0.02). <sup>1</sup>H NMR (500 MHz, CDCl<sub>3</sub>) δ 3.09 – 3.15 (m, 1H), 2.97 – 3.03 (m, 1H), 2.71 – 2.92 (m, 3H), 2.48 – 2.62 (m, 3H), 2.36 – 2.43 (m, 1H), 1.70 – 1.84 (m, 4H), 1.55 – 1.62 (m, 1H), 1.24 – 1.48 (m, 5H); <sup>13</sup>C NMR (125 MHz, CDCl<sub>3</sub>) δ 212.7, 59.9, 56.2, 53.0, 51.7, 42.1, 34.6, 28.5, 28.3, 26.8, 24.9 ; IR (neat): 2923, 2850, 1703, 1446, 1404; MS (ES<sup>+</sup>) Calculated for [C<sub>11</sub>H<sub>20</sub>NO]<sup>+</sup>: 182.2; Found: 182.2.

***N*-Octylazepan-4-one (6e)**

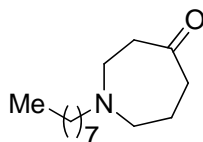

**6e**

Compounds **6e** were prepared in 69 % yield according to the general procedure B. The reaction time is 1 h for the formation of *N*-oxide and 2 h for Au catalysis. The residue was purified through silica gel flash chromatography (eluents: hexanes : ethyl acetate : Et<sub>3</sub>N = 2 : 1 : 0.03). <sup>1</sup>H NMR (400 MHz, CDCl<sub>3</sub>) δ 2.71 – 2.75 (m, 4H), 2.60 – 2.63 (m, 2H), 2.50 – 2.53 (m, 2H), 2.46 (t, 2H, *J* = 7.2 Hz), 1.79 – 1.84 (m, 2H), 1.43 – 1.47 (m, 2H), 1.24 – 1.30 (m, 10H), 0.87 (t, 3H, *J* = 6.8 Hz); <sup>13</sup>C NMR (125 MHz, CDCl<sub>3</sub>) δ 213.6, 58.1, 57.9, 50.6, 44.2, 42.9, 31.8, 29.5, 29.2, 27.4, 27.3, 23.9, 22.6, 14.1; IR (neat): 2929, 2856, 1702, 1467; MS (ES<sup>+</sup>) Calculated for [C<sub>14</sub>H<sub>28</sub>NO]<sup>+</sup>: 226.2; Found: 226.2.

#### ***N*-Benzylazepan-4-one (6f)**

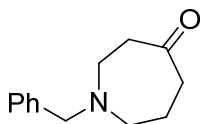

**6f**

Compounds **6f** were prepared in 85 % yield according to the general procedure B. The reaction time is 1 h for the formation of *N*-oxide and 2 h for Au catalysis. The residue was purified through silica gel flash chromatography (eluents: hexanes : ethyl acetate : Et<sub>3</sub>N = 5 : 1 : 0.06). <sup>1</sup>H NMR (400 MHz, CDCl<sub>3</sub>) δ 7.25 – 7.33 (m, 5H), 3.65 (s, 2H), 2.71 – 2.76 (m, 4H), 2.59 – 2.62 (m, 2H), 2.52 – 2.55 (m, 2H), 1.82 – 1.88 (m, 2H); <sup>13</sup>C NMR (125 MHz, CDCl<sub>3</sub>) δ 213.5, 138.9, 128.7, 128.3, 127.1, 62.7, 57.9, 50.4, 44.3, 42.9, 24.1; IR (neat): 2939, 2813, 1702, 1453, 1351; MS (ES<sup>+</sup>) Calculated for [C<sub>13</sub>H<sub>18</sub>NO]<sup>+</sup>: 204.1; Found: 204.1.

#### ***N*-Benzyl-2-propylazepan-4-one (6g)**

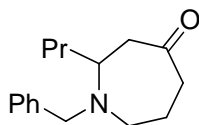

**6g**

Compounds **6g** and **6g'** were prepared in 73 % combined yield (ratio: **6g** : **6g'** = 2 : 1) according to the general procedure B. The reaction time is 1 h for the formation of *N*-oxide and 6 h for Au catalysis.  $\text{PEt}_3\text{AuNTf}_2$  was used as Au catalyst. The residue was purified through silica gel flash chromatography (eluents: hexanes: ethyl acetate :  $\text{NEt}_3$  = 10 : 1 : 0.11) to afford some **6g** pure along with a mixture of **6g** and **6g'**. **6g**:  $^1\text{H}$  NMR (400 MHz,  $\text{CDCl}_3$ )  $\delta$  7.22 – 7.33 (m, 5H), 3.78 (d, 1H,  $J$  = 13.6 Hz), 3.58 (d, 1H,  $J$  = 13.6 Hz), 3.15 – 3.18 (m, 1H), 2.96 (dt, 1H,  $J$  = 4.0, 14.0 Hz), 2.71 – 2.78 (m, 2H), 2.63 – 2.55 (m, 2H), 2.37 – 2.44 (m, 1H), 1.79 – 1.88 (m, 1H), 1.59 – 1.74 (m, 1H), 1.35 – 1.43 (m, 4H), 0.91 (t, 3H,  $J$  = 6.8 Hz);  $^{13}\text{C}$  NMR (125 MHz,  $\text{CDCl}_3$ )  $\delta$  213.1, 139.8, 128.4, 128.3, 126.9, 57.6, 53.9, 50.1, 47.6, 42.6, 33.7, 20.9, 19.9, 14.0; IR (neat): 2955, 2931, 1698, 1455; MS ( $\text{ES}^+$ ) Calculated for  $[\text{C}_{16}\text{H}_{24}\text{NO}]^+$ : 246.2; Found: 246.2.

***N*-Benzyl-2-propylazepan-4-one (6g) and *N*-butyl-2-phenylazepan-4-one (6g')**

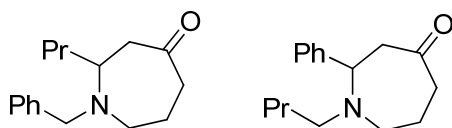

**6g**

**6g'**

A mixture of **6g** and **6g'**:  $^1\text{H}$  NMR (400 MHz,  $\text{CDCl}_3$ )  $\delta$  7.18- 7.31 (m, 8.3 H), 3.89 (dd, 0.86 H,  $J$  = 10.4, 4.4 Hz), 3.73 (d, 1H,  $J$  = 13.6 Hz), 3.53 (d, 1H,  $J$  = 13.6 Hz), 3.19 (ddd, 1.03 H,  $J$  = 3.6, 10.4, 14.4 Hz), 3.10- 3.13 (m, 1.03 H), 3.01 (dd, 0.99 H,  $J$  = 10.0, 14.4 Hz), 2.92 (m, 1.06 H), 2.59 – 2.73 (m, 4.13 H), 2.44 – 2.56 (m, 4.24 H), 2.31– 2.39 (m, 2.28 H), 2.21– 2.27 (m, 1H), 1.75 – 1.98 (m, 3.38 H), 1.67 – 1.74 (m, 1.23 H), 1.55 – 1.59 (m, 1.03 H), 1.26 – 1.38 (m, 5.25 H), 1.09 – 1.41 (m, 2.21 H), 0.87 (t, 2.93 H,  $J$  = 7.2 Hz), 0.73 (t, 2.49 H,  $J$  = 7.6 Hz);  $^{13}\text{C}$  NMR (125 MHz,  $\text{CDCl}_3$ )  $\delta$  213.1, 212.2, 142.8, 139.8, 128.4, 128.4, 128.3, 127.2, 127.0, 126.9, 63.7, 57.6, 53.9, 53.4, 51.9, 51.0, 50.1, 49.1, 47.6, 42.7, 42.6, 33.7, 29.5, 22.5, 20.9, 20.2, 19.9, 14.0, 13.9; IR (neat): 2955, 2930, 1698, 1455; MS ( $\text{ES}^+$ ) Calculated for  $[\text{C}_{16}\text{H}_{24}\text{NO}]^+$ : 246.2; Found: 246.2.

***N*-(2-Bromobenzyl)-2-propylazepan-4-one (6h)**

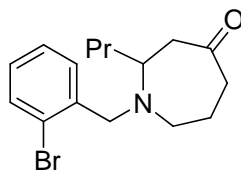

**6h**

Compounds **6h** were prepared in 71 % yield according to the general procedure B. The reaction time is 1 h for the formation of *N*-oxide and 8 h for Au catalysis. The residue was purified through silica gel flash chromatography (eluent: hexanes: ethyl acetate: NEt<sub>3</sub> = 10 : 1 : 0.11). <sup>1</sup>H NMR (500 MHz, CDCl<sub>3</sub>) δ 7.50 (dd, 1H, *J* = 7.6, 1.2 Hz), 7.45 (dd, 1H, *J* = 2.5, 9.5 Hz), 7.28 (td, 1H, *J* = 7.2, 1.2 Hz), 7.09 (td, 1H, *J* = 1.4, 8.4 Hz), 3.78 (s, 2H), 3.07 – 3.12 (m, 1H), 2.96 – 3.02 (m, 1H), 2.76 – 2.82 (m, 2H), 2.56 – 2.58 (m, 2H), 2.37 – 2.44 (m, 1H), 1.79 – 1.90 (m, 2H), 1.59 – 1.64 (m, 1H), 1.32 – 1.45 (m, 3H), 0.89 (t, 3H, *J* = 7.2 Hz); <sup>13</sup>C NMR (125 MHz, CDCl<sub>3</sub>) δ 212.8, 138.6, 132.6, 130.3, 128.2, 127.2, 124.1, 57.7, 54.4, 50.1, 47.4, 42.5, 33.4, 21.4, 19.8, 14.0; IR (neat): 2954, 2860, 2804, 1699, 1566, 1457, 1437, 1363; MS (ES<sup>+</sup>) Calculated for [C<sub>16</sub>H<sub>23</sub>BrNO]<sup>+</sup>: 324.1; Found: 324.1.

**1,4,5,7,8,12b-Hexahydro-3H-azepino[2,1-a]isoquinolin-2-one (6i)**

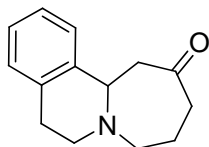

**6i**

Compounds **6i** were prepared in 70 % yield according to the general procedure B. The reaction time is 1 h for the formation of *N*-oxide and 8 h for Au catalysis. The residue was purified through silica gel flash chromatography (eluent: hexanes: ethyl acetate: Et<sub>3</sub>N = 1 : 1 : 0.02). <sup>1</sup>H NMR (500 MHz, CDCl<sub>3</sub>) δ 7.07– 7.18 (m, 4H), 4.00 (dd, 1H, *J* = 2.8, 9.6 Hz), 3.18 – 3.23 (m, 1H), 3.07 – 3.11 (m, 1H), 2.93 – 3.00 (m, 2H), 2.58 – 2.86 (m, 6H), 1.84 – 2.04 (m, 2H); <sup>13</sup>C NMR (125 MHz, CDCl<sub>3</sub>) δ 211.8, 138.0, 134.8, 128.5, 126.9, 126.1, 59.8, 59.0, 53.5, 50.5, 42.2, 29.8, 23.0 ; IR (neat): 2935, 2817, 1698, 1493, 1452, 1363; MS (ES<sup>+</sup>) Calculated for [C<sub>14</sub>H<sub>18</sub>NO]<sup>+</sup>: 216.1; Found: 216.1.

***N*-Benzyl-2-(4-methoxyphenyl)azepan-4-one (6j) and *N*-(4-methoxybenzyl)-2-phenylazepan-4-one (6j')**

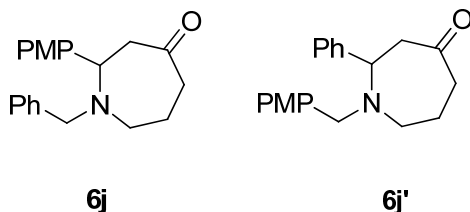

Compounds **6j** and **6j'** were prepared in 63 % combined yield (ratio = 1.3 : 1) according to the general procedure B. The reaction time is 1 h for the formation of *N*-oxide and 2 h for Au catalysis. The residue was purified through silica gel flash chromatography (eluent: hexanes: ethyl acetate : Et<sub>3</sub>N = 10 : 1 : 0.11). <sup>1</sup>H NMR (400 MHz, CDCl<sub>3</sub>) δ 7.43 (d, 1.14 H, *J* = 6.8 Hz), 7.36 (t, 1.89 H, *J* = 7.2 Hz), 7.19 – 7.34 (m, 2.90 H), 7.14 (d, 1.09 H, *J* = 8.8 Hz), 6.89 (d, 0.70 H, *J* = 8.8 Hz), 6.82 (d, 1.06 H, *J* = 9.2 Hz), 3.95 – 4.00 (m, 0.95 H), 3.80 (s, 1.22 H), 3.78 (s, 1.64 H), 3.52 – 3.61 (m, 1.0 H), 3.27 – 3.35 (m, 0.97 H), 3.06 – 3.19 (m, 1.93 H), 2.76 (dd, 0.96 H, *J* = 4.4, 13.6 Hz), 2.49 – 2.59 (m, 2.95 H), 1.96 – 2.02 (m, 1.05 H), 1.84 – 1.90 (m, 1.08 H); <sup>13</sup>C NMR (125 MHz, CDCl<sub>3</sub>) δ 212.2, 212.1, 158.8, 158.6, 142.4, 139.6, 134.3, 131.4, 129.5, 128.6, 128.4, 128.3, 127.4, 127.3, 126.8, 113.9, 113.6, 64.0, 63.4, 56.8, 56.4, 55.2, 55.2, 50.7, 50.5, 49.0, 48.9, 42.4, 42.3, 22.2; IR (neat): 2930, 1701, 1698, 1646, 1455; MS (ES<sup>+</sup>) Calculated for [C<sub>20</sub>H<sub>24</sub>NO<sub>2</sub>]<sup>+</sup>: 310.2; Found: 310.2.

**Ethyl (4-oxo-2-propylazepan-1-yl)acetate (6k) and ethyl 1-butyl-4-oxoazepane-2-carboxylate (6k')**

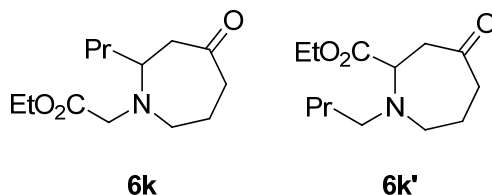

Compounds **6k** and **6k'** were prepared in 93 % combined yield (ratio: **6j** : **6j'** = 5 : 1) according to the general procedure B. The reaction time is 1 h for the formation of *N*-oxide and 2 h for Au catalysis. PEt<sub>3</sub>AuNTf<sub>2</sub> was used as Au catalyst. These two products

were separated through silica gel flash chromatography (eluents: hexanes: ethyl acetate :  $\text{Et}_3\text{N}$  = 5 : 1 : 0.06).

Compound **6k**:

$^1\text{H}$  NMR (500 MHz,  $\text{CDCl}_3$ )  $\delta$  4.15 (dd, 2H,  $J$  = 6.8, 14.0 Hz), 7.38 (dd, 2H,  $J$  = 16.8, 32.8 Hz), 3.08 – 3.18 (m, 2H), 2.91 – 2.98 (m, 1H), 2.59 – 2.72 (m, 2H), 2.39 – 2.53 (m, 2H), 1.72 – 1.82 (m, 2H), 1.46 – 1.52 (m, 1H), 1.32 – 1.39 (m, 3H), 1.26 (t, 3H,  $J$  = 8.5 Hz), 0.90 (t, 3H,  $J$  = 6.8 Hz);  $^{13}\text{C}$  NMR (125 MHz,  $\text{CDCl}_3$ )  $\delta$  212.5, 171.7, 60.6, 58.0, 52.6, 51.6, 47.8, 42.8, 34.8, 21.6, 19.7, 14.2, 14.0; IR (neat): 2934, 1744, 1698, 1456; MS ( $\text{ES}^+$ ) Calculated for  $[\text{C}_{13}\text{H}_{24}\text{NO}_3]^+$ : 242.2; Found: 242.2.

Compound **6k'**:

$^1\text{H}$  NMR (500 MHz,  $\text{CDCl}_3$ )  $\delta$  4.13 – 4.24 (m, 2H), 3.74 (t, 1H,  $J$  = 8.0 Hz), 3.03 – 3.09 (m, 2H), 2.79 – 2.86 (m, 1H), 2.71 – 2.74 (m, 1H), 2.56 – 2.66 (m, 2H), 2.42 – 2.51 (m, 2H), 1.71– 1.98 (m, 2H), 1.38– 1.45 (m, 2H), 1.23– 1.36 (m, 5H), 0.88 (t, 3H,  $J$  = 7.2 Hz);  $^{13}\text{C}$  NMR (125 MHz,  $\text{CDCl}_3$ )  $\delta$  210.7, 171.8, 60.7, 60.4, 54.8, 50.7, 44.3, 42.3, 30.4, 23.2, 20.2, 14.4, 13.9; IR (neat): 2957, 1725, 1540, 1456, 1363; MS ( $\text{ES}^+$ ) Calculated for  $[\text{C}_{13}\text{H}_{24}\text{NO}_3]^+$ : 242.2; Found: 242.2.

(**4S**<sup>\*</sup>,**10aR**<sup>\*</sup>)-4-Methyloctahydropyrido[1,2-a]azepin-9-one (**6l**)

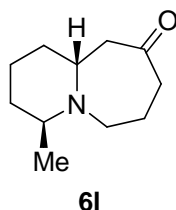

Compounds **6l** were prepared in 74 % yield according to the general procedure B. The reaction time is 1 h for the formation of *N*-oxide and 4 h for Au catalysis. The residue was purified through silica gel flash chromatography (eluents: ethyl acetate : methanol :  $\text{NH}_4\text{OH}$  = 5 : 1 : 0.06).  $^1\text{H}$  NMR (500 MHz,  $\text{CDCl}_3$ )  $\delta$  3.16 (q, 1H,  $J$  = 6.8 Hz), 2.97– 3.06 (m, 3H), 2.39 – 2.62 (m, 3H), 2.26 – 2.32 (m, 1H), 1.91 – 2.02 (m, 1H), 1.34 – 1.77 (m, 7H), 1.13 (d, 3H,  $J$  = 7.2 Hz);  $^{13}\text{C}$  NMR (125 MHz,  $\text{CDCl}_3$ )  $\delta$  213.0, 54.2, 54.1, 52.4, 48.7, 42.9, 33.8, 33.1, 21.2, 19.0, 14.6 ; IR (neat): 2931, 1704, 1446, 1372, 1347; MS ( $\text{ES}^+$ ) Calculated for  $[\text{C}_{11}\text{H}_{20}\text{NO}]^+$ : 182.2; Found: 182.0.

**(2*R*<sup>\*</sup>,10*aR*<sup>\*</sup>)-2-Methyloctahydropyrido[1,2-*a*]azepin-9-one (6m)**

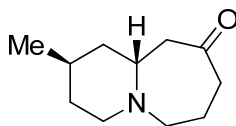

**6m**

Compounds **6m** were prepared in 76 % yield according to the general procedure B. The reaction time is 1 h for the formation of *N*-oxide and 4 h for Au catalysis. The residue was purified through silica gel flash chromatography (eluents: ethyl acetate : methanol : NH<sub>4</sub>OH = 5 : 1 : 0.06). <sup>1</sup>H NMR (500 MHz, CDCl<sub>3</sub>) δ 3.08 – 3.15 (m, 2H), 2.84 – 2.90 (m, 1H), 2.79 – 2.83 (m, 1H), 2.41 – 2.65 (m, 4H), 2.18 (d, 1H, *J* = 12.0 Hz), 2.01 – 2.06 (m, 1H), 1.67 – 1.79 (m, 3H), 1.56 – 1.61 (m, 1H), 1.56 (m, 1H), 1.42 – 1.47 (m, 1H), 1.29 – 1.34 (m, 1H), 0.94 (d, 3H, *J* = 6.5 Hz); <sup>13</sup>C NMR (125 MHz, CDCl<sub>3</sub>) δ 213.0, 58.8, 54.9, 48.2, 48.0, 42.7, 41.0, 32.9, 25.1, 20.7, 19.8; IR (neat): 2925, 1701, 1457, 1354; MS (ES<sup>+</sup>) Calculated for [C<sub>11</sub>H<sub>20</sub>NO]<sup>+</sup>: 182.2; Found: 181.9.

**Methyl (3*S*<sup>\*</sup>, 9*aR*<sup>\*</sup>)-8-oxooctahydropyrrolo[1,2-*a*]azepine-3-carboxylate (6n)**

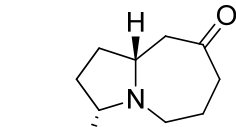

**6n**

Compounds **6n** were prepared in 71 % yield according to the general procedure B. The reaction time is 1 h for the formation of *N*-oxide and 2 h for Au catalysis. PEt<sub>3</sub>AuNTf<sub>2</sub> was used as Au catalyst. The residue was purified through silica gel flash chromatography (eluents: hexanes : ethyl acetate: Et<sub>3</sub>N = 5 : 1 : 0.06). <sup>1</sup>H NMR (500 MHz, CDCl<sub>3</sub>) δ 3.86 (dd, 1H, *J* = 8.0, 1.6 Hz), 3.68 (s, 3H), 3.08 – 3.44 (m, 1H), 3.05 (dt, 1H, *J* = 12.4, 4.0 Hz), 2.73 – 2.80 (m, 1H), 2.47 – 2.62 (m, 4H), 2.27 – 2.34 (m, 1H), 2.08 – 2.18 (m, 1H), 1.78 – 1.86 (m, 3H), 1.51 – 1.57 (m, 1H); <sup>13</sup>C NMR (125 MHz, CDCl<sub>3</sub>) δ 212.6, 174.3, 67.5, 57.1, 51.9, 51.3, 51.2, 43.0, 31.6, 27.3, 25.3; IR (neat): 2949, 1731, 1702, 1435, 1327, 1193, 1160; MS (ES<sup>+</sup>) Calculated for [C<sub>11</sub>H<sub>17</sub>NO<sub>3</sub>+H]<sup>+</sup>: 212.1; Found: 212.1.

**6-Ethyl-1-phenethylazepan-4-one (8)**

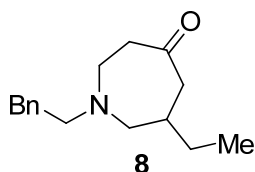

Compounds **8** were prepared in 81 % yield according to the general procedure B. The reaction time is 1 h for the formation of *N*-oxide and 2 h for Au catalysis (PEt<sub>3</sub>AuNTf<sub>2</sub> as catalyst). The residue was purified through silica gel flash chromatography (eluent: hexanes : ethyl acetate : Et<sub>3</sub>N = 10 : 1 : 0.11). <sup>1</sup>H NMR (500 MHz, CDCl<sub>3</sub>) δ 7.24 – 7.32 (m, 5H), 3.68 (d, 1H, *J* = 13.5 Hz), 3.63 (d, 1H, *J* = 13.5 Hz), 2.82 – 2.87 (m, 2H), 2.64 – 2.73 (m, 2H), 2.52 (dd, 1H, *J* = 14.5, 3.0 Hz), 2.40 – 2.46 (m, 3H), 1.84 – 1.87 (m, 1H), 1.26 – 1.35 (m, 2H), 0.87 (t, 3H, *J* = 7.5 Hz); <sup>13</sup>C NMR (125 MHz, CDCl<sub>3</sub>) δ 212.7, 139.0, 128.6, 128.3, 127.0, 63.4, 62.9, 50.7, 48.5, 44.2, 36.9, 27.1, 11.5; IR (neat): 2953, 2930, 2818, 1702, 1455, 1027; MS (ES<sup>+</sup>) Calculated for [C<sub>15</sub>H<sub>22</sub>NO]<sup>+</sup>: 232.2; Found: 232.2.

#### ***N*-Benzyl-7-hexylazepan-4-one (10)**

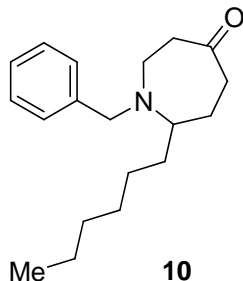

Compounds **10** were prepared in 73 % yield according to the general procedure B. The reaction time is 1 h for the formation of *N*-oxide and 3 h for Au catalysis. The residue was purified through silica gel flash chromatography (eluent: hexanes : ethyl acetate : Et<sub>3</sub>N = 10 : 1 : 0.11). <sup>1</sup>H NMR (500 MHz, CDCl<sub>3</sub>) δ 7.22 – 7.34 (m, 5H), 3.77 (d, 1H, *J* = 14.0 Hz), 3.66 (d, 1H, *J* = 14.0 Hz), 3.02 – 3.06 (m, 1H), 2.86 – 2.90 (m, 1H), 2.73 – 2.79 (m, 1H), 2.46 – 2.60 (m, 4H), 1.94 – 2.00 (m, 1H), 1.63 – 1.73 (m, 2H), 1.30– 1.43 (m, 9H), 0.89 (t, 3H, *J* = 6.5 Hz); <sup>13</sup>C NMR (125 MHz, CDCl<sub>3</sub>) δ 213.4, 139.5, 128.4, 128.3, 126.9, 61.6, 55.1, 43.4, 41.8, 40.1, 31.8, 30.2, 29.4, 26.7, 25.5, 22.6, 14.0; IR (neat): 2956, 2930, 2857, 1697, 1455, 1377; MS (ES<sup>+</sup>) Calculated for [C<sub>19</sub>H<sub>30</sub>NO]<sup>+</sup>: 288.2; Found: 288.2.

**1-Benzyl-5-pentylazepan-4-one (12) and 1-methyl-5-pentyl-2-phenylazepan-4-one (12')**

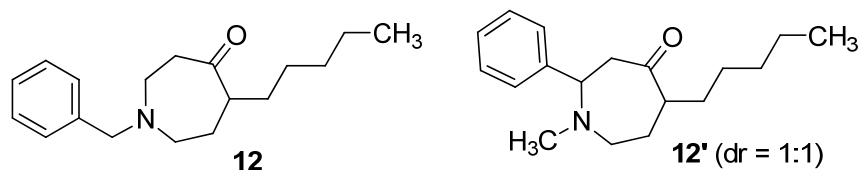

Compounds **12** and **12'** were prepared in a combined 71 % yield according to the general procedure B. The reaction time is 1 h for the formation of *N*-oxide and 2 h for Au catalysis. The ratio of **12** and **12'** is 1.7/1, and no diastereoselectivity for compound **12'** was observed (dr = 1:1). The residue was purified through silica gel flash chromatography (eluents: hexanes : ethyl acetate : Et<sub>3</sub>N = 10 : 1 : 0.11). Compound **12**: <sup>1</sup>H NMR (400 MHz, CDCl<sub>3</sub>) δ 7.23 – 7.34 (m, 5H), 3.64 (d, 1H, *J* = 11.2 Hz), 3.62 (d, 1H, *J* = 11.2 Hz), 2.38 – 2.95 (m, 7H), 1.63 – 1.82 (m, 3H), 1.26 – 1.34 (m, 7H), 0.89 (t, 3H, *J* = 7.2 Hz); <sup>13</sup>C NMR (125 MHz, CDCl<sub>3</sub>) δ 214.3, 138.9, 128.6, 128.3, 127.0, 68.2, 62.5, 56.2, 51.3, 50.7, 43.4, 31.9, 31.5, 30.6, 26.8, 22.5, 14.0; IR (neat): 2931, 1698, 1465, 1397; MS (ES<sup>+</sup>) Calculated for [C<sub>18</sub>H<sub>27</sub>NO+H]<sup>+</sup>: 274.2; Found: 274.2.

**1-Methyl-5-pentyl-2-phenylazepan-4-one (12')**

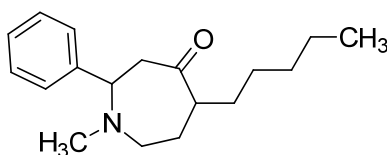

**12' (one diastereomer)**

One of the diastereomers of compound **12'** was isolated pure. While its relative stereochemistry was not determined, its spectra data are shown as following : <sup>1</sup>H NMR (400 MHz, CDCl<sub>3</sub>) δ 7.23 – 7.33 (m, 5H), 3.38 (dd, 1H, *J* = 3.6, 10.4 Hz), 3.05 (m, 2H), 2.41 – 2.58 (m, 3H), 2.24 – 2.32 (m, 1H), 2.03 – 2.15 (m, 3H), 1.79 – 1.92 (m, 2H), 1.20 – 1.39 (m, 7H), 0.89 (t, 3H, *J* = 7.2 Hz); <sup>13</sup>C NMR (125 MHz, CDCl<sub>3</sub>) δ 212.2, 143.6, 128.5, 127.2, 127.1, 68.2, 67.8, 53.4, 50.8, 50.4, 44.5, 31.9, 29.5, 27.9, 27.0, 22.5, 14.0; IR (neat): 2931, 1698, 1465, 1397; MS (ES<sup>+</sup>) Calculated for [C<sub>18</sub>H<sub>27</sub>NO+H]<sup>+</sup>: 274.2; Found: 274.2.

**X-Ray crystal data and structure for azepan-4-one 6a**

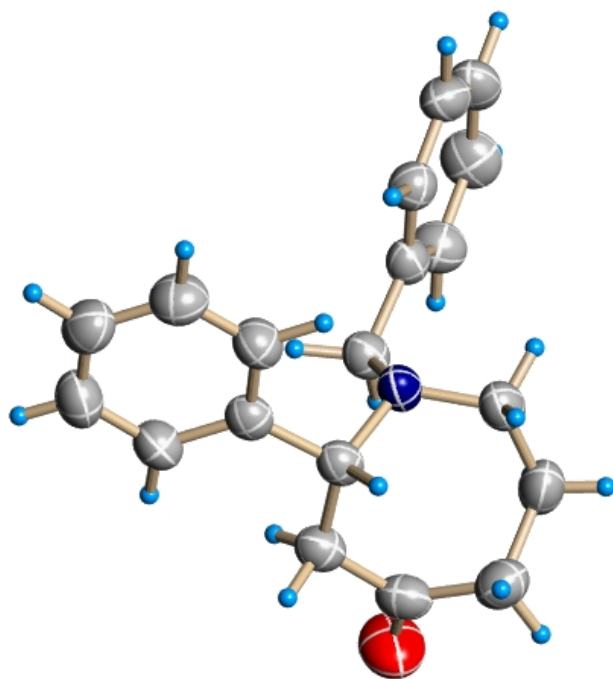

Table 1. Crystal data and structure refinement for 6a.

|                                   |                                                                                                                                       |
|-----------------------------------|---------------------------------------------------------------------------------------------------------------------------------------|
| Identification code               | 6a                                                                                                                                    |
| Empirical formula                 | C <sub>38</sub> H <sub>42</sub> N <sub>2</sub> O <sub>2</sub>                                                                         |
| Formula weight                    | 558.74                                                                                                                                |
| Temperature                       | 293(2) K                                                                                                                              |
| Wavelength                        | 0.71073 Å                                                                                                                             |
| Crystal system, space group       | Triclinic, P-1                                                                                                                        |
| Unit cell dimensions              | a = 5.7366(19) Å    alpha = 109.154(5) deg.<br>b = 10.508(3) Å    beta = 91.003(5) deg.<br>c = 13.624(4) Å    gamma = 102.607(5) deg. |
| Volume                            | 753.5(4) Å <sup>3</sup>                                                                                                               |
| Z, calculated density             | 1, 1.231 Mg/m <sup>3</sup>                                                                                                            |
| Absorption coefficient            | 0.075 mm <sup>-1</sup>                                                                                                                |
| F(000)                            | 300                                                                                                                                   |
| Crystal size                      | 0.3 x 0.1 x 0.1 mm                                                                                                                    |
| Theta range for data collection   | 1.59 to 26.41 deg.                                                                                                                    |
| Limiting indices                  | -7 ≤ h ≤ 7, -13 ≤ k ≤ 12, -17 ≤ l ≤ 17                                                                                                |
| Reflections collected / unique    | 6116 / 2958 [R(int) = 0.0596]                                                                                                         |
| Completeness to theta = 26.41     | 95.5 %                                                                                                                                |
| Absorption correction             | Empirical                                                                                                                             |
| Max. and min. transmission        | 0.554 and 0.320                                                                                                                       |
| Refinement method                 | Full-matrix least-squares on F <sup>2</sup>                                                                                           |
| Data / restraints / parameters    | 2958 / 0 / 274                                                                                                                        |
| Goodness-of-fit on F <sup>2</sup> | 0.914                                                                                                                                 |
| Final R indices [I > 2sigma(I)]   | R <sub>1</sub> = 0.0498, wR <sub>2</sub> = 0.1030                                                                                     |
| R indices (all data)              | R <sub>1</sub> = 0.0865, wR <sub>2</sub> = 0.1170                                                                                     |
| Largest diff. peak and hole       | 0.153 and -0.276 e.Å <sup>-3</sup>                                                                                                    |

Table 2. Atomic coordinates (x 10<sup>4</sup>) and equivalent isotropic displacement parameters (Å<sup>2</sup> x 10<sup>3</sup>) for 6a. U(eq) is defined as one third of the trace of the orthogonalized U<sub>ij</sub> tensor.

| x | y | z | U(eq) |
|---|---|---|-------|
|---|---|---|-------|

| L1.TXT |          |          |          |       |
|--------|----------|----------|----------|-------|
| C(1)   | 1735(3)  | 8214(2)  | 1570(1)  | 41(1) |
| C(2)   | 238(3)   | 9488(2)  | 3183(1)  | 38(1) |
| C(3)   | 2737(3)  | 10349(2) | 3683(2)  | 44(1) |
| C(4)   | 3837(4)  | 11545(2) | 3333(1)  | 50(1) |
| C(5)   | 2284(4)  | 12150(2) | 2801(2)  | 54(1) |
| C(6)   | 1545(4)  | 11209(2) | 1667(2)  | 53(1) |
| C(7)   | -490(4)  | 9954(2)  | 1552(2)  | 47(1) |
| C(8)   | -630(3)  | 8269(2)  | 3568(1)  | 39(1) |
| C(9)   | 737(4)   | 7906(2)  | 4237(1)  | 46(1) |
| C(10)  | -182(4)  | 6776(2)  | 4542(2)  | 55(1) |
| C(11)  | -2470(4) | 6000(2)  | 4209(2)  | 55(1) |
| C(12)  | -3869(4) | 6358(2)  | 3553(2)  | 57(1) |
| C(13)  | -2949(3) | 7469(2)  | 3233(2)  | 47(1) |
| C(14)  | 1033(3)  | 7323(2)  | 438(1)   | 38(1) |
| C(15)  | 2708(4)  | 7291(2)  | -280(2)  | 51(1) |
| C(16)  | 2123(4)  | 6409(2)  | -1306(2) | 60(1) |
| C(17)  | -119(4)  | 5564(2)  | -1621(2) | 55(1) |
| C(18)  | -1819(4) | 5603(2)  | -913(2)  | 50(1) |
| C(19)  | -1233(3) | 6477(2)  | 108(1)   | 43(1) |
| N      | -51(2)   | 8960(1)  | 2032(1)  | 39(1) |
| O      | 5992(3)  | 11995(2) | 3470(1)  | 81(1) |

Table 3. Bond lengths [Å] and angles [deg] for 6a.

|             |           |
|-------------|-----------|
| C(1)-N      | 1.453(2)  |
| C(1)-C(14)  | 1.510(2)  |
| C(1)-H(1A)  | 1.003(17) |
| C(1)-H(1B)  | 1.010(18) |
| C(2)-N      | 1.474(2)  |
| C(2)-C(3)   | 1.527(2)  |
| C(2)-C(8)   | 1.528(2)  |
| C(2)-H(2)   | 1.019(16) |
| C(3)-C(4)   | 1.503(3)  |
| C(3)-H(3A)  | 0.987(19) |
| C(3)-H(3B)  | 0.98(2)   |
| C(4)-O      | 1.211(2)  |
| C(4)-C(5)   | 1.501(3)  |
| C(5)-C(6)   | 1.528(3)  |
| C(5)-H(5A)  | 0.976(19) |
| C(5)-H(5B)  | 0.980(19) |
| C(6)-C(7)   | 1.521(3)  |
| C(6)-H(6A)  | 0.91(2)   |
| C(6)-H(6B)  | 1.02(2)   |
| C(7)-N      | 1.463(2)  |
| C(7)-H(7A)  | 0.981(18) |
| C(7)-H(7B)  | 1.024(19) |
| C(8)-C(9)   | 1.387(2)  |
| C(8)-C(13)  | 1.387(2)  |
| C(9)-C(10)  | 1.386(3)  |
| C(9)-H(9)   | 0.960(18) |
| C(10)-C(11) | 1.365(3)  |
| C(10)-H(10) | 0.92(2)   |
| C(11)-C(12) | 1.383(3)  |
| C(11)-H(11) | 1.001(18) |
| C(12)-C(13) | 1.380(3)  |
| C(12)-H(12) | 0.95(2)   |
| C(13)-H(13) | 1.020(19) |
| C(14)-C(19) | 1.377(2)  |
| C(14)-C(15) | 1.381(2)  |
| C(15)-C(16) | 1.386(3)  |
| C(15)-H(15) | 0.983(19) |

L1.TXT

|                   |            |
|-------------------|------------|
| C(16)-C(17)       | 1.363(3)   |
| C(16)-H(16)       | 0.99(2)    |
| C(17)-C(18)       | 1.380(3)   |
| C(17)-H(17)       | 1.00(2)    |
| C(18)-C(19)       | 1.380(3)   |
| C(18)-H(18)       | 0.981(17)  |
| C(19)-H(19)       | 0.999(18)  |
|                   |            |
| N-C(1)-C(14)      | 113.26(14) |
| N-C(1)-H(1A)      | 114.6(10)  |
| C(14)-C(1)-H(1A)  | 107.3(10)  |
| N-C(1)-H(1B)      | 106.4(10)  |
| C(14)-C(1)-H(1B)  | 109.2(9)   |
| H(1A)-C(1)-H(1B)  | 105.8(13)  |
| N-C(2)-C(3)       | 115.49(14) |
| N-C(2)-C(8)       | 108.43(13) |
| C(3)-C(2)-C(8)    | 112.55(15) |
| N-C(2)-H(2)       | 104.2(8)   |
| C(3)-C(2)-H(2)    | 108.2(8)   |
| C(8)-C(2)-H(2)    | 107.4(8)   |
| C(4)-C(3)-C(2)    | 117.66(16) |
| C(4)-C(3)-H(3A)   | 105.7(10)  |
| C(2)-C(3)-H(3A)   | 108.9(11)  |
| C(4)-C(3)-H(3B)   | 107.8(10)  |
| C(2)-C(3)-H(3B)   | 112.5(10)  |
| H(3A)-C(3)-H(3B)  | 103.1(15)  |
| O-C(4)-C(5)       | 120.47(18) |
| O-C(4)-C(3)       | 119.22(19) |
| C(5)-C(4)-C(3)    | 120.29(18) |
| C(4)-C(5)-C(6)    | 110.27(17) |
| C(4)-C(5)-H(5A)   | 106.4(11)  |
| C(6)-C(5)-H(5A)   | 109.8(11)  |
| C(4)-C(5)-H(5B)   | 110.8(10)  |
| C(6)-C(5)-H(5B)   | 109.5(10)  |
| H(5A)-C(5)-H(5B)  | 110.0(15)  |
| C(7)-C(6)-C(5)    | 113.16(17) |
| C(7)-C(6)-H(6A)   | 105.8(12)  |
| C(5)-C(6)-H(6A)   | 109.0(12)  |
| C(7)-C(6)-H(6B)   | 111.0(11)  |
| C(5)-C(6)-H(6B)   | 110.6(11)  |
| H(6A)-C(6)-H(6B)  | 107.0(16)  |
| N-C(7)-C(6)       | 117.60(17) |
| N-C(7)-H(7A)      | 107.6(10)  |
| C(6)-C(7)-H(7A)   | 108.2(10)  |
| N-C(7)-H(7B)      | 104.5(9)   |
| C(6)-C(7)-H(7B)   | 110.5(9)   |
| H(7A)-C(7)-H(7B)  | 108.1(14)  |
| C(9)-C(8)-C(13)   | 117.39(17) |
| C(9)-C(8)-C(2)    | 124.54(16) |
| C(13)-C(8)-C(2)   | 118.06(16) |
| C(10)-C(9)-C(8)   | 120.93(19) |
| C(10)-C(9)-H(9)   | 119.3(11)  |
| C(8)-C(9)-H(9)    | 119.7(11)  |
| C(11)-C(10)-C(9)  | 121.0(2)   |
| C(11)-C(10)-H(10) | 119.2(11)  |
| C(9)-C(10)-H(10)  | 119.7(11)  |
| C(10)-C(11)-C(12) | 118.8(2)   |
| C(10)-C(11)-H(11) | 122.5(10)  |
| C(12)-C(11)-H(11) | 118.6(10)  |
| C(13)-C(12)-C(11) | 120.4(2)   |
| C(13)-C(12)-H(12) | 121.6(12)  |
| C(11)-C(12)-H(12) | 118.1(12)  |
| C(12)-C(13)-C(8)  | 121.47(19) |

|                   | L1.TXT     |
|-------------------|------------|
| C(12)-C(13)-H(13) | 119.3(10)  |
| C(8)-C(13)-H(13)  | 119.2(10)  |
| C(19)-C(14)-C(15) | 118.51(16) |
| C(19)-C(14)-C(1)  | 121.24(16) |
| C(15)-C(14)-C(1)  | 120.17(16) |
| C(14)-C(15)-C(16) | 120.56(19) |
| C(14)-C(15)-H(15) | 117.5(11)  |
| C(16)-C(15)-H(15) | 122.0(11)  |
| C(17)-C(16)-C(15) | 120.4(2)   |
| C(17)-C(16)-H(16) | 121.9(11)  |
| C(15)-C(16)-H(16) | 117.7(11)  |
| C(16)-C(17)-C(18) | 119.55(19) |
| C(16)-C(17)-H(17) | 121.0(11)  |
| C(18)-C(17)-H(17) | 119.5(11)  |
| C(19)-C(18)-C(17) | 120.02(19) |
| C(19)-C(18)-H(18) | 119.4(10)  |
| C(17)-C(18)-H(18) | 120.6(10)  |
| C(14)-C(19)-C(18) | 120.94(18) |
| C(14)-C(19)-H(19) | 118.5(10)  |
| C(18)-C(19)-H(19) | 120.5(10)  |
| C(1)-N-C(7)       | 114.60(14) |
| C(1)-N-C(2)       | 113.59(13) |
| C(7)-N-C(2)       | 114.83(13) |

Symmetry transformations used to generate equivalent atoms:

†

Table 4. Anisotropic displacement parameters ( $\text{\AA}^2 \times 10^3$ ) for 6a.  
The anisotropic displacement factor exponent takes the form:  
 $-2 \pi^2 [h^2 a^{*2} U_{11} + \dots + 2 h k a^* b^* U_{12}]$

|       | U11   | U22   | U33   | U23   | U13   | U12   |
|-------|-------|-------|-------|-------|-------|-------|
| C(1)  | 43(1) | 45(1) | 38(1) | 12(1) | 3(1)  | 16(1) |
| C(2)  | 41(1) | 40(1) | 33(1) | 9(1)  | 4(1)  | 14(1) |
| C(3)  | 46(1) | 45(1) | 38(1) | 8(1)  | 1(1)  | 12(1) |
| C(4)  | 52(1) | 47(1) | 41(1) | 6(1)  | 3(1)  | 5(1)  |
| C(5)  | 61(1) | 41(1) | 56(1) | 15(1) | 6(1)  | 9(1)  |
| C(6)  | 74(2) | 46(1) | 47(1) | 21(1) | 7(1)  | 20(1) |
| C(7)  | 58(1) | 46(1) | 39(1) | 12(1) | -1(1) | 20(1) |
| C(8)  | 43(1) | 41(1) | 31(1) | 8(1)  | 6(1)  | 15(1) |
| C(9)  | 46(1) | 52(1) | 41(1) | 15(1) | 0(1)  | 12(1) |
| C(10) | 66(1) | 62(1) | 45(1) | 24(1) | 5(1)  | 23(1) |
| C(11) | 65(1) | 50(1) | 52(1) | 21(1) | 12(1) | 11(1) |
| C(12) | 51(1) | 54(1) | 59(1) | 17(1) | 5(1)  | 5(1)  |
| C(13) | 45(1) | 52(1) | 46(1) | 16(1) | 0(1)  | 14(1) |
| C(14) | 44(1) | 36(1) | 36(1) | 11(1) | 4(1)  | 16(1) |
| C(15) | 48(1) | 55(1) | 48(1) | 12(1) | 8(1)  | 14(1) |
| C(16) | 63(1) | 69(1) | 48(1) | 14(1) | 20(1) | 25(1) |
| C(17) | 75(2) | 49(1) | 38(1) | 6(1)  | 2(1)  | 24(1) |
| C(18) | 55(1) | 38(1) | 52(1) | 10(1) | -4(1) | 10(1) |
| C(19) | 47(1) | 41(1) | 43(1) | 14(1) | 7(1)  | 13(1) |
| N     | 45(1) | 40(1) | 33(1) | 10(1) | 3(1)  | 17(1) |
| O     | 52(1) | 93(1) | 94(1) | 42(1) | -5(1) | -7(1) |

†

Table 5. Hydrogen coordinates ( $\times 10^4$ ) and isotropic displacement parameters ( $\text{\AA}^2 \times 10^3$ ) for 6a.

L1.TXT

|       | x         | y         | z         | U(eq) |
|-------|-----------|-----------|-----------|-------|
| H(2)  | -940(30)  | 10111(16) | 3384(11)  | 37(4) |
| H(9)  | 2370(30)  | 8420(18)  | 4469(13)  | 54(5) |
| H(10) | 790(30)   | 6517(19)  | 4954(15)  | 57(6) |
| H(11) | -3180(30) | 5186(19)  | 4424(13)  | 55(5) |
| H(12) | -5480(40) | 5830(20)  | 3343(15)  | 71(6) |
| H(13) | -4010(30) | 7724(18)  | 2755(14)  | 59(5) |
| H(15) | 4310(40)  | 7919(19)  | -36(15)   | 66(6) |
| H(16) | 3380(30)  | 6430(19)  | -1796(15) | 67(6) |
| H(17) | -560(40)  | 4930(20)  | -2361(16) | 74(6) |
| H(18) | -3430(30) | 4992(18)  | -1125(13) | 53(5) |
| H(19) | -2460(30) | 6516(18)  | 624(14)   | 54(5) |
| H(1A) | 3380(30)  | 8816(18)  | 1612(13)  | 49(5) |
| H(3A) | 2680(30)  | 10753(19) | 4443(16)  | 62(6) |
| H(5A) | 3260(30)  | 13050(20) | 2823(14)  | 60(6) |
| H(6A) | 980(30)   | 11690(20) | 1307(15)  | 63(6) |
| H(7A) | -950(30)  | 9447(18)  | 805(15)   | 52(5) |
| H(1B) | 1910(30)  | 7603(18)  | 1991(13)  | 50(5) |
| H(3B) | 3910(30)  | 9777(19)  | 3626(13)  | 52(5) |
| H(5B) | 850(30)   | 12273(18) | 3163(14)  | 55(5) |
| H(6B) | 3000(40)  | 10910(20) | 1316(15)  | 73(6) |
| H(7B) | -1960(30) | 10260(18) | 1879(13)  | 54(5) |

†

Table 6. Torsion angles [deg] for 6a.

|                         |             |
|-------------------------|-------------|
| N-C(2)-C(3)-C(4)        | 52.2(2)     |
| C(8)-C(2)-C(3)-C(4)     | 177.50(15)  |
| C(2)-C(3)-C(4)-O        | -159.13(18) |
| C(2)-C(3)-C(4)-C(5)     | 19.5(3)     |
| O-C(4)-C(5)-C(6)        | 101.9(2)    |
| C(3)-C(4)-C(5)-C(6)     | -76.7(2)    |
| C(4)-C(5)-C(6)-C(7)     | 78.6(2)     |
| C(5)-C(6)-C(7)-N        | -62.5(2)    |
| N-C(2)-C(8)-C(9)        | 124.50(17)  |
| C(3)-C(2)-C(8)-C(9)     | -4.5(2)     |
| N-C(2)-C(8)-C(13)       | -55.78(19)  |
| C(3)-C(2)-C(8)-C(13)    | 175.20(16)  |
| C(13)-C(8)-C(9)-C(10)   | 0.8(3)      |
| C(2)-C(8)-C(9)-C(10)    | -179.46(16) |
| C(8)-C(9)-C(10)-C(11)   | -1.1(3)     |
| C(9)-C(10)-C(11)-C(12)  | 0.2(3)      |
| C(10)-C(11)-C(12)-C(13) | 0.9(3)      |
| C(11)-C(12)-C(13)-C(8)  | -1.1(3)     |
| C(9)-C(8)-C(13)-C(12)   | 0.2(3)      |
| C(2)-C(8)-C(13)-C(12)   | -179.51(16) |
| N-C(1)-C(14)-C(19)      | -46.1(2)    |
| N-C(1)-C(14)-C(15)      | 137.29(17)  |
| C(19)-C(14)-C(15)-C(16) | -1.0(3)     |
| C(1)-C(14)-C(15)-C(16)  | 175.77(17)  |
| C(14)-C(15)-C(16)-C(17) | 0.3(3)      |
| C(15)-C(16)-C(17)-C(18) | 0.7(3)      |
| C(16)-C(17)-C(18)-C(19) | -1.0(3)     |
| C(15)-C(14)-C(19)-C(18) | 0.7(3)      |
| C(1)-C(14)-C(19)-C(18)  | -175.98(16) |
| C(17)-C(18)-C(19)-C(14) | 0.2(3)      |
| C(14)-C(1)-N-C(7)       | -62.48(19)  |
| C(14)-C(1)-N-C(2)       | 162.78(14)  |

|                  |        |            |
|------------------|--------|------------|
|                  | L1.TXT |            |
| C(6)-C(7)-N-C(1) |        | -66.2(2)   |
| C(6)-C(7)-N-C(2) |        | 67.9(2)    |
| C(3)-C(2)-N-C(1) |        | 52.4(2)    |
| C(8)-C(2)-N-C(1) |        | -75.00(17) |
| C(3)-C(2)-N-C(7) |        | -82.3(2)   |
| C(8)-C(2)-N-C(7) |        | 150.37(15) |

---

Symmetry transformations used to generate equivalent atoms:

‡

2\*SPEC IDG400-SFE  
UCSB

Pulse Sequence: szpu1  
Solvent: cdcl3  
Ambient temperature  
User: 1-12-87  
INOVA-400 "nmr-400"

Relax. delay 3.000 sec  
Pulse 48.5 degrees  
Acq. time 2.000 sec  
Width 5132.5 Hz  
20 repetitions  
OBSERVE H1, 399.9486720 MHz  
DATA PROCESSING  
Line broadening 0.1 Hz  
FT size 65536  
Total time 10 min, 41 sec

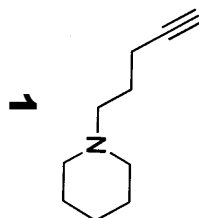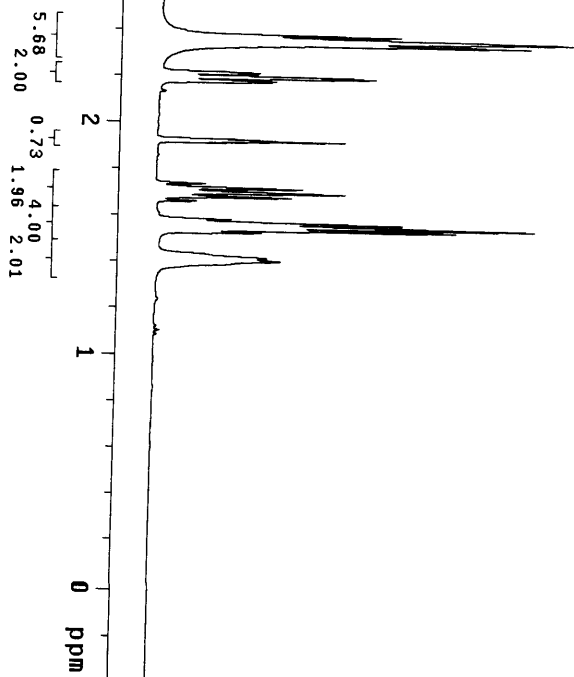

11cu1-6m3csm

Automation directory: /home/walkup/vnmrSYS/data/auto\_2009.06.17\_27

File : exp  
Sample id : tmpstudy

Pulse Sequence: s2pul

Solvent: cdcl3  
Temp. 25.0 C / 298.1 K  
Operator: walkup  
VNMRS-400 "mr400"

Relax. delay 1.000 sec  
Pulse 45.0 degrees  
Acq. time 1.300 sec  
Width 24309.8 Hz  
16 repetitions  
OBSERVE C13, 100.5943068 MHz  
DECOUPLE H1, 400.0585543 MHz  
Power 44 dB  
continuously on  
WALTZ-16 modulated  
DATA PROCESSING  
Line broadening 0.5 Hz  
FT size 65536  
Total time 1 hr, 16 min, 58 sec

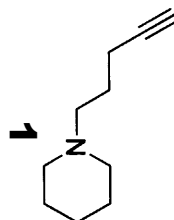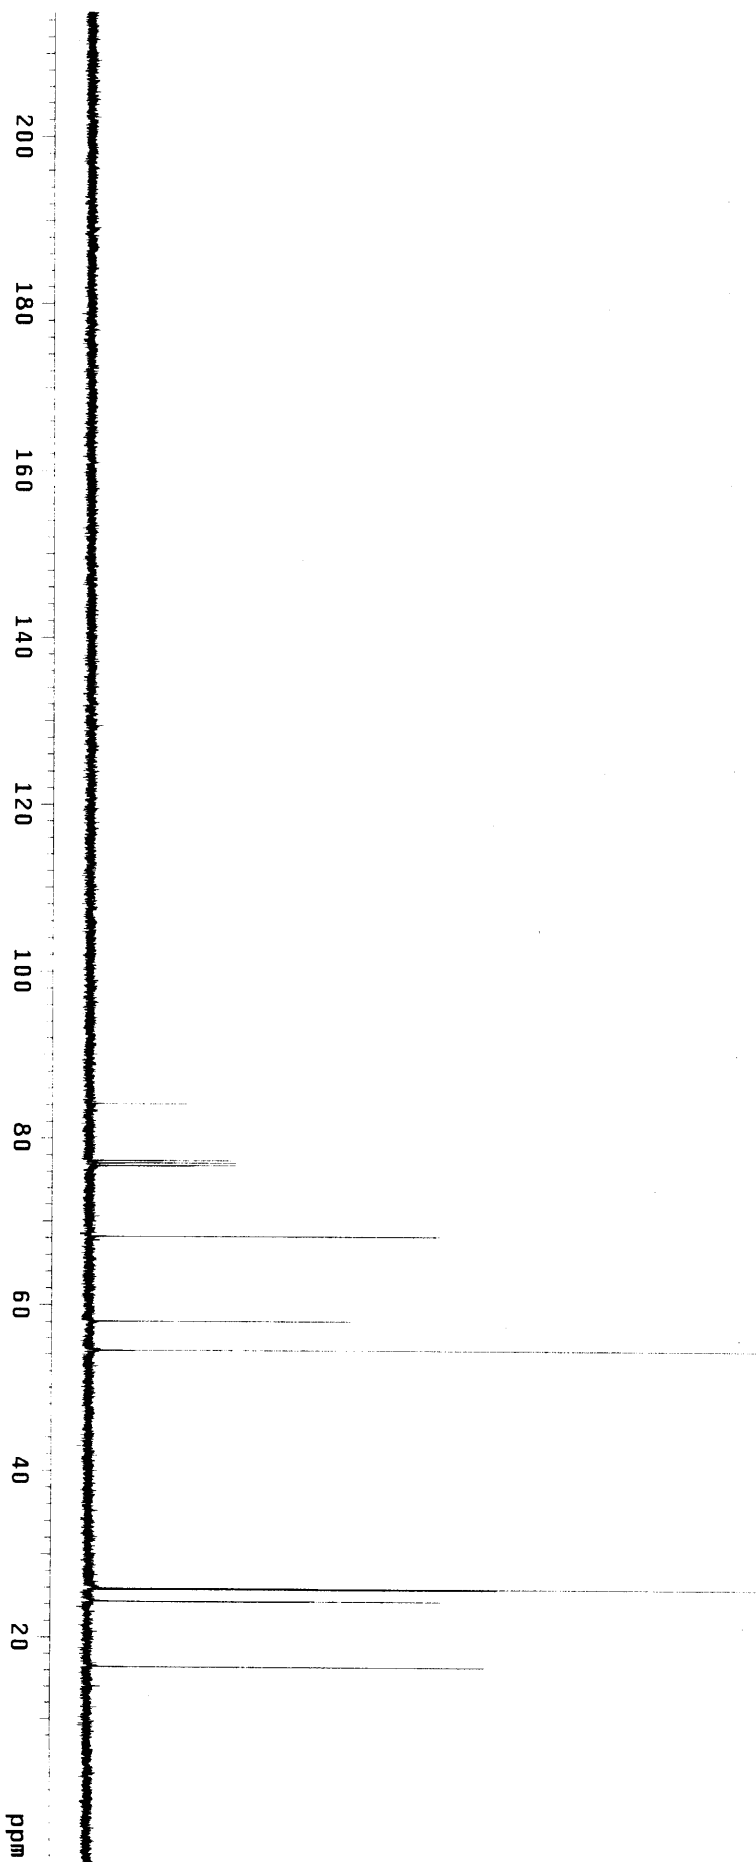

H1\_CDCL3

Data Collected on:  
nmr500-inova500  
Archive directory:  
/export/home/vnmr1/vnmr/sys/data  
Sample directory:

File: H1

Pulse Sequence: s2pul

Solvent: cdcl3

Operator: tcui

Relax. delay 2.000 sec

Pulse 56.8 degrees

Acq. time 2.668 sec

Width 5997.0 Hz

24 repetitions

OBSERVE H1 499.8563625 MHz

DATA PROCESSING

Resol. enhancement -0.0 Hz

FT size 32768

Total time 0 min

3

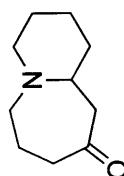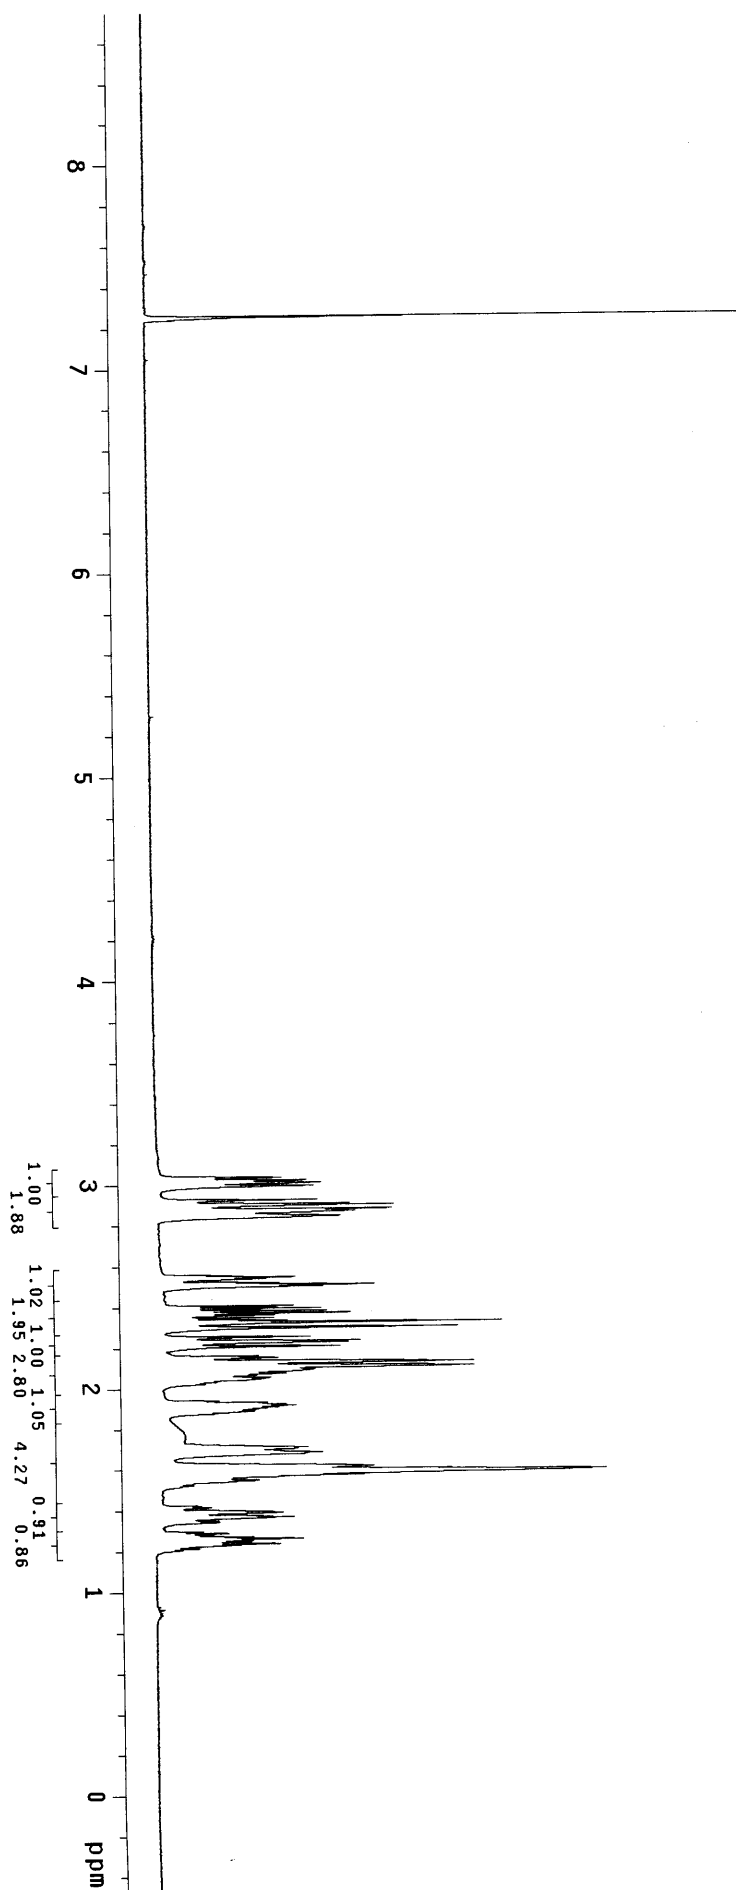

1tcu1-59-2

Automation directory: /home/walkup/vnmr/sys/data/auto\_2009.05.14\_03  
File : exp  
Sample id : tmpstudy

Pulse Sequence: s2pu1

Solvent: cdcl3  
Temp: 25.0 C / 298.1 K  
Operator: walkup  
VNMRS-500 "nmr500"

Relax. delay 1.000 sec  
Pulse 45.0 degrees  
Acq. time 1.300 sec  
Width 30487.8 Hz  
17752 repetitions  
OBSERVE C13, 125.6732818 MHz  
DECOUPLE H1, 499.7964114 MHz  
Power 39 dB  
continuously on  
WALTZ-16 modulated  
DATA PROCESSING  
Line broadening 0.5 Hz  
FT size 131072  
Total time 12 hr, 49 min, 47 sec

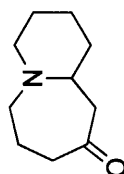

**3**

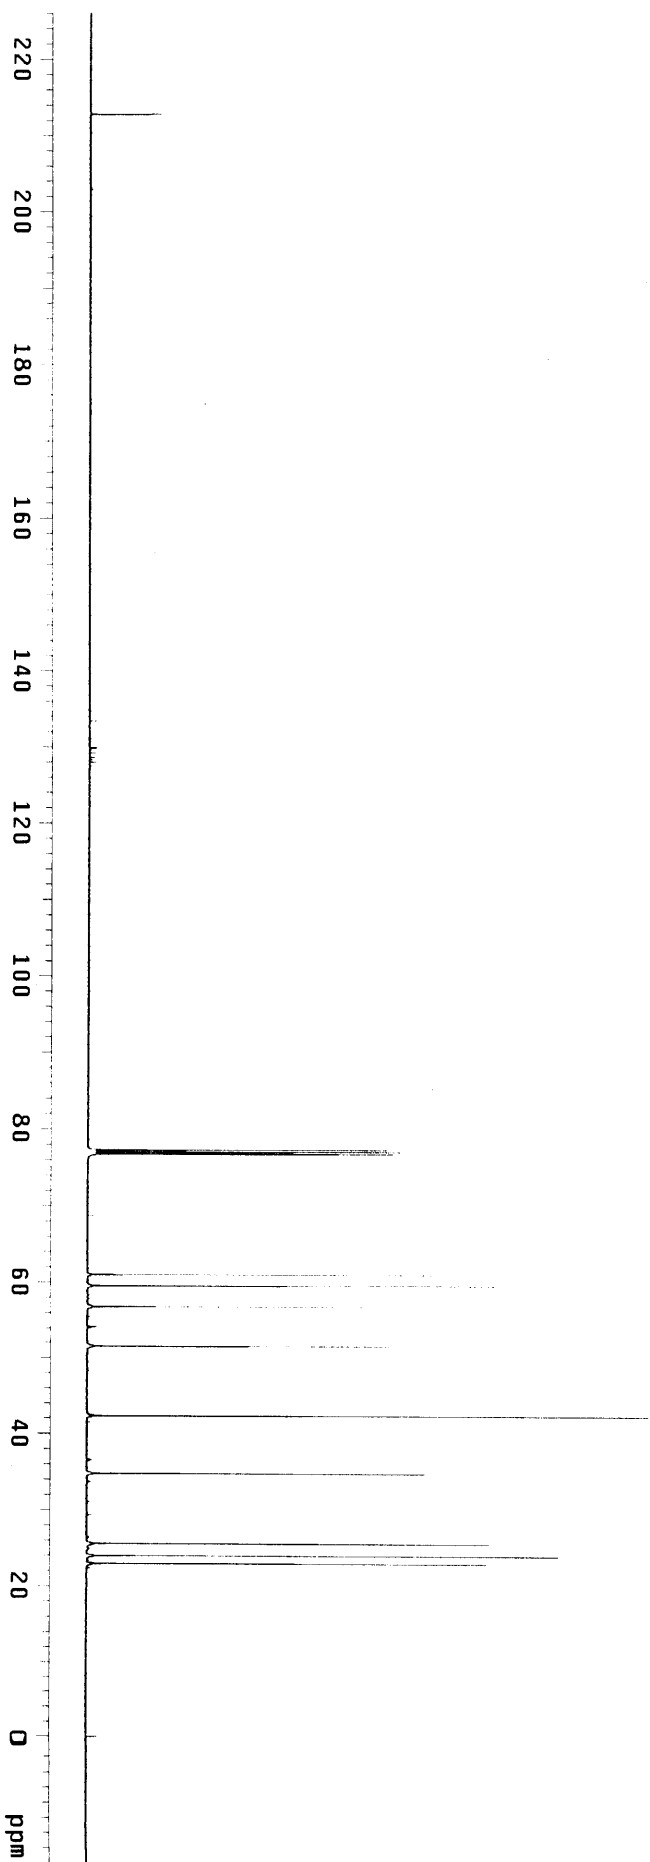

11cut-61-2

Archive directory:  
Sample directory:

Pulse Sequence: szpul

Solvent: cdcl3  
Temp. 25.0 C / 298.1 K  
File: 11cut-61-2-1H  
INOVA-500 "nmrserver"

Relax. delay 1.000 sec  
Pulse 45.0 degrees  
Acq. time 2.049 sec  
Width 8012.8 Hz  
28 repetitions  
OBSERVE H1 499.7939123 MHz  
DATA PROCESSING  
Line broadening 0.2 Hz  
FT size 65536  
Total time 6 min, 37 sec

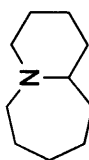

4

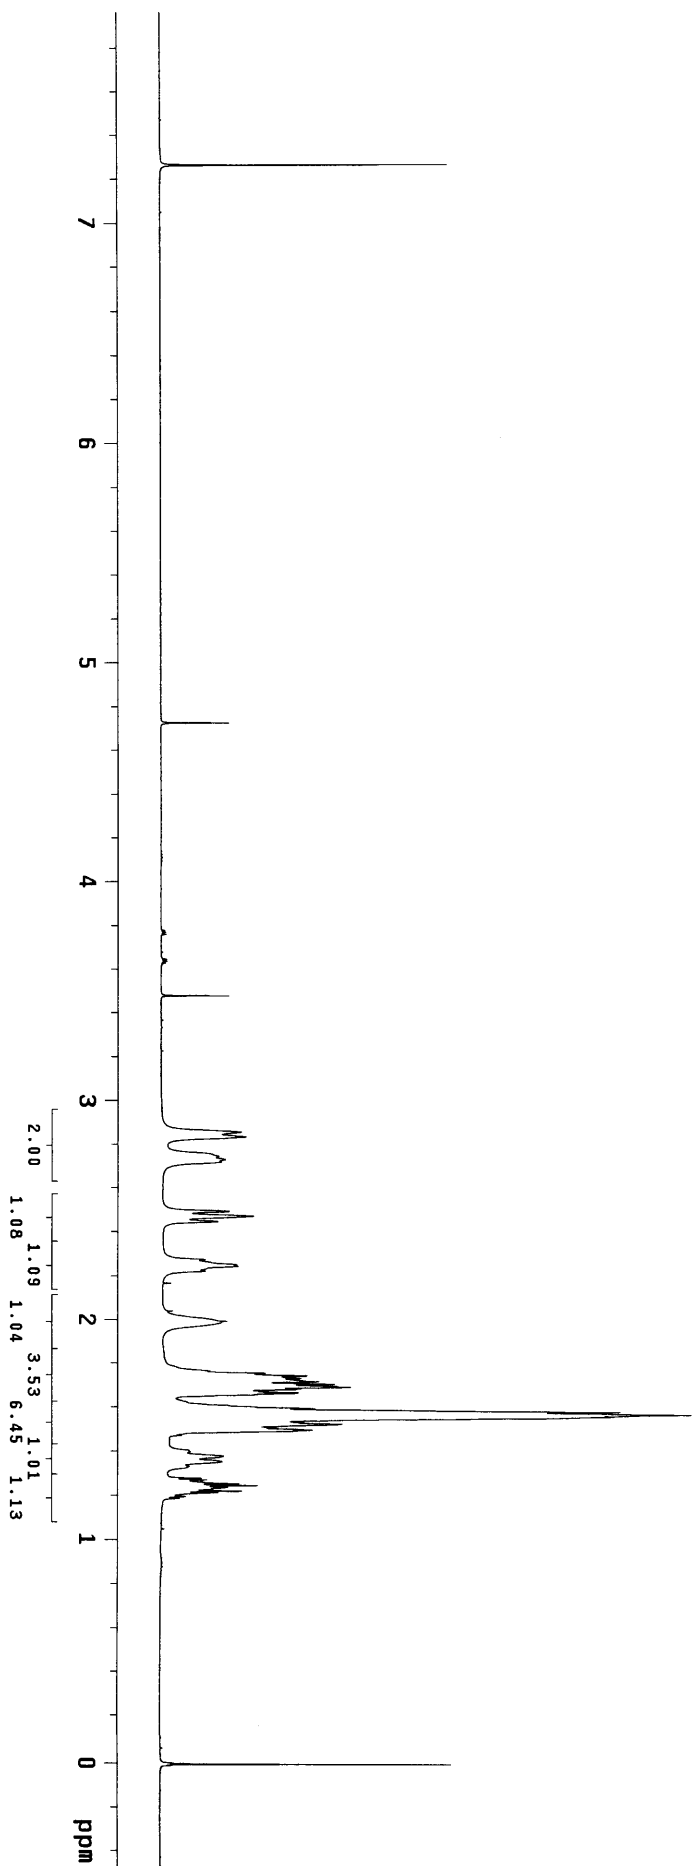

11cut-61-2

Archive directory:  
Sample directory:

Pulse Sequence: s2pul

Solvent: cdcl3

Temp. 25.0 C / 298.1 K

User: 1-14-87

File: 11cut-61-2-13C

INNOVA-500 "nmr-server"

Relax. delay 1.000 sec

Pulse 45.0 degrees

Acq. time 1.300 sec

Width 30487.8 Hz

25200 repetitions

OBSERVE C13, 125.6732790 MHz

DECOUPLE H1, 499.7964114 MHz

Power 39 dB

continuously on

WALTZ-16 modulated

DATA PROCESSING

Line broadening 0.5 Hz

Fit size 131072

Total time 25 hr, 39 min, 35 sec

4

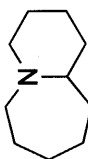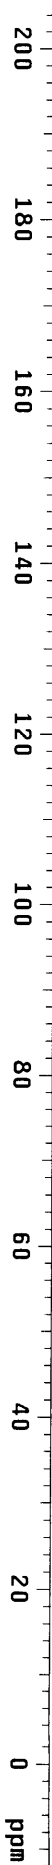

11cui-62-1-1H

Automation directory: /home/walkup/vnmrSYS/data/auto\_2009.05.19\_24  
File: exp  
Sample id: tmpstudy

Pulse Sequence: s2pul  
Solvent: cdcl3  
Temp: 25.0 C / 298.1 K  
Operator: walkup  
Vnmrs-400 "mr400"

Relax. delay 1.000 sec  
Pulse 45.0 degrees  
Acq. time 2.009 sec  
Width 6410.3 Hz  
12 repetitions  
OBSERVE H1, 400.0565536 MHz  
DATA PROCESSING  
Resol. enhancement -0.0 Hz  
FT size 65536  
Total time 6 min, 31 sec

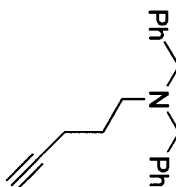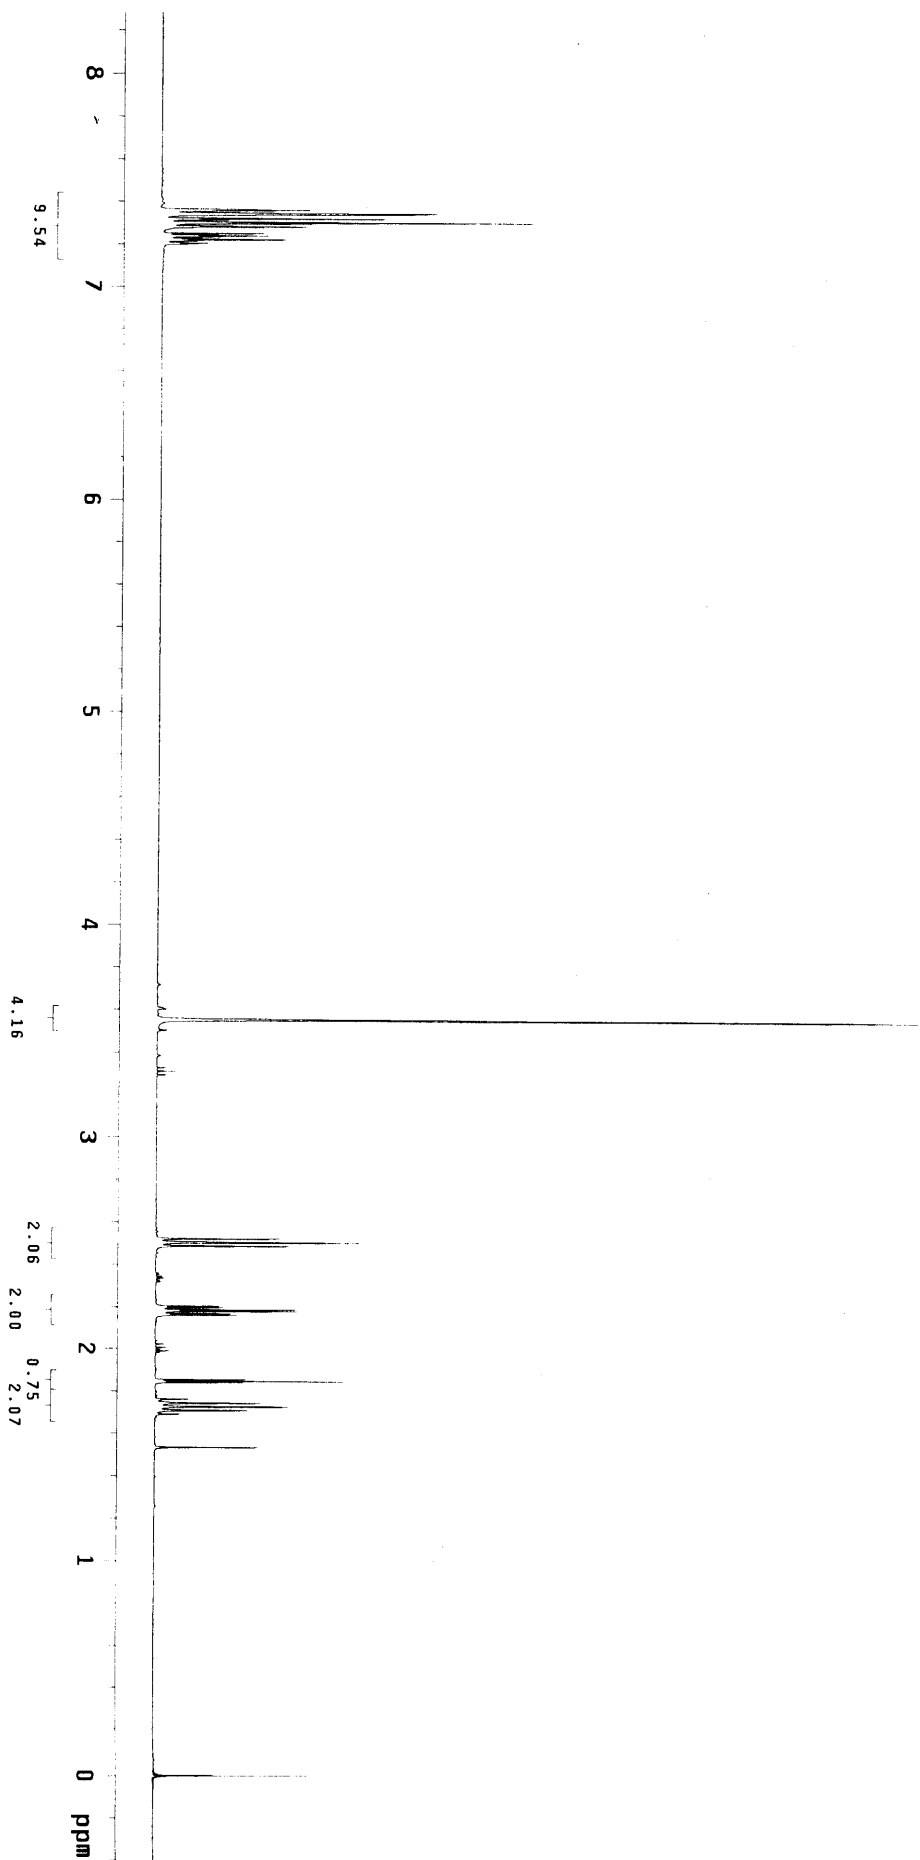

11uc1-106-1-13C

Data Collected on:  
nmr500-inova500  
Archive directory:  
/export/home/vmr1/vnmrsys/data  
Sample directory:

File: CARBON

Pulse Sequence: szpul  
Solvent: cdcl3  
Temp. 25.0 C / 298.1 K  
Operator: lcu1

Relax. delay 3.000 sec  
Pulse 58.7 degrees  
Acq. time 1.300 sec  
Width 28258.6 Hz  
80 repetitions  
OBSERVE C13, 125.688979 MHz  
DECUPLE H1, 499.858575 MHz  
Power 36 dB  
on during acquisition  
off during delay  
WALTZ-16 modulated  
DATA PROCESSING  
Line broadening 1.0 Hz  
Ft size 131072  
Total time 0 min

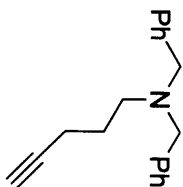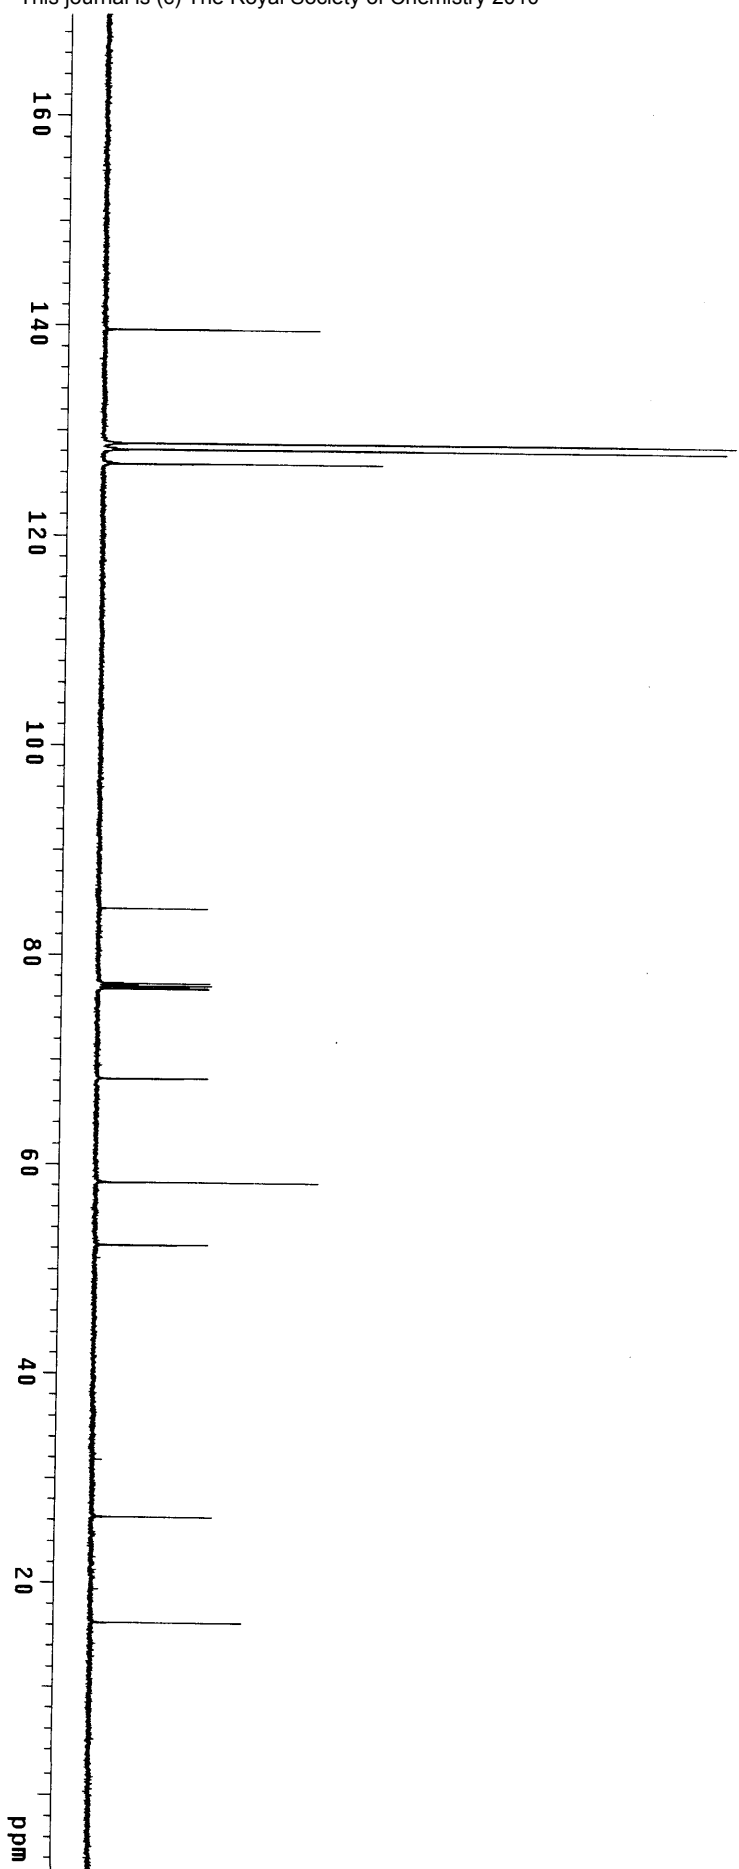

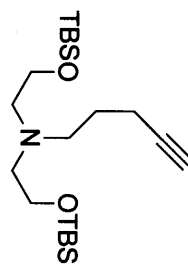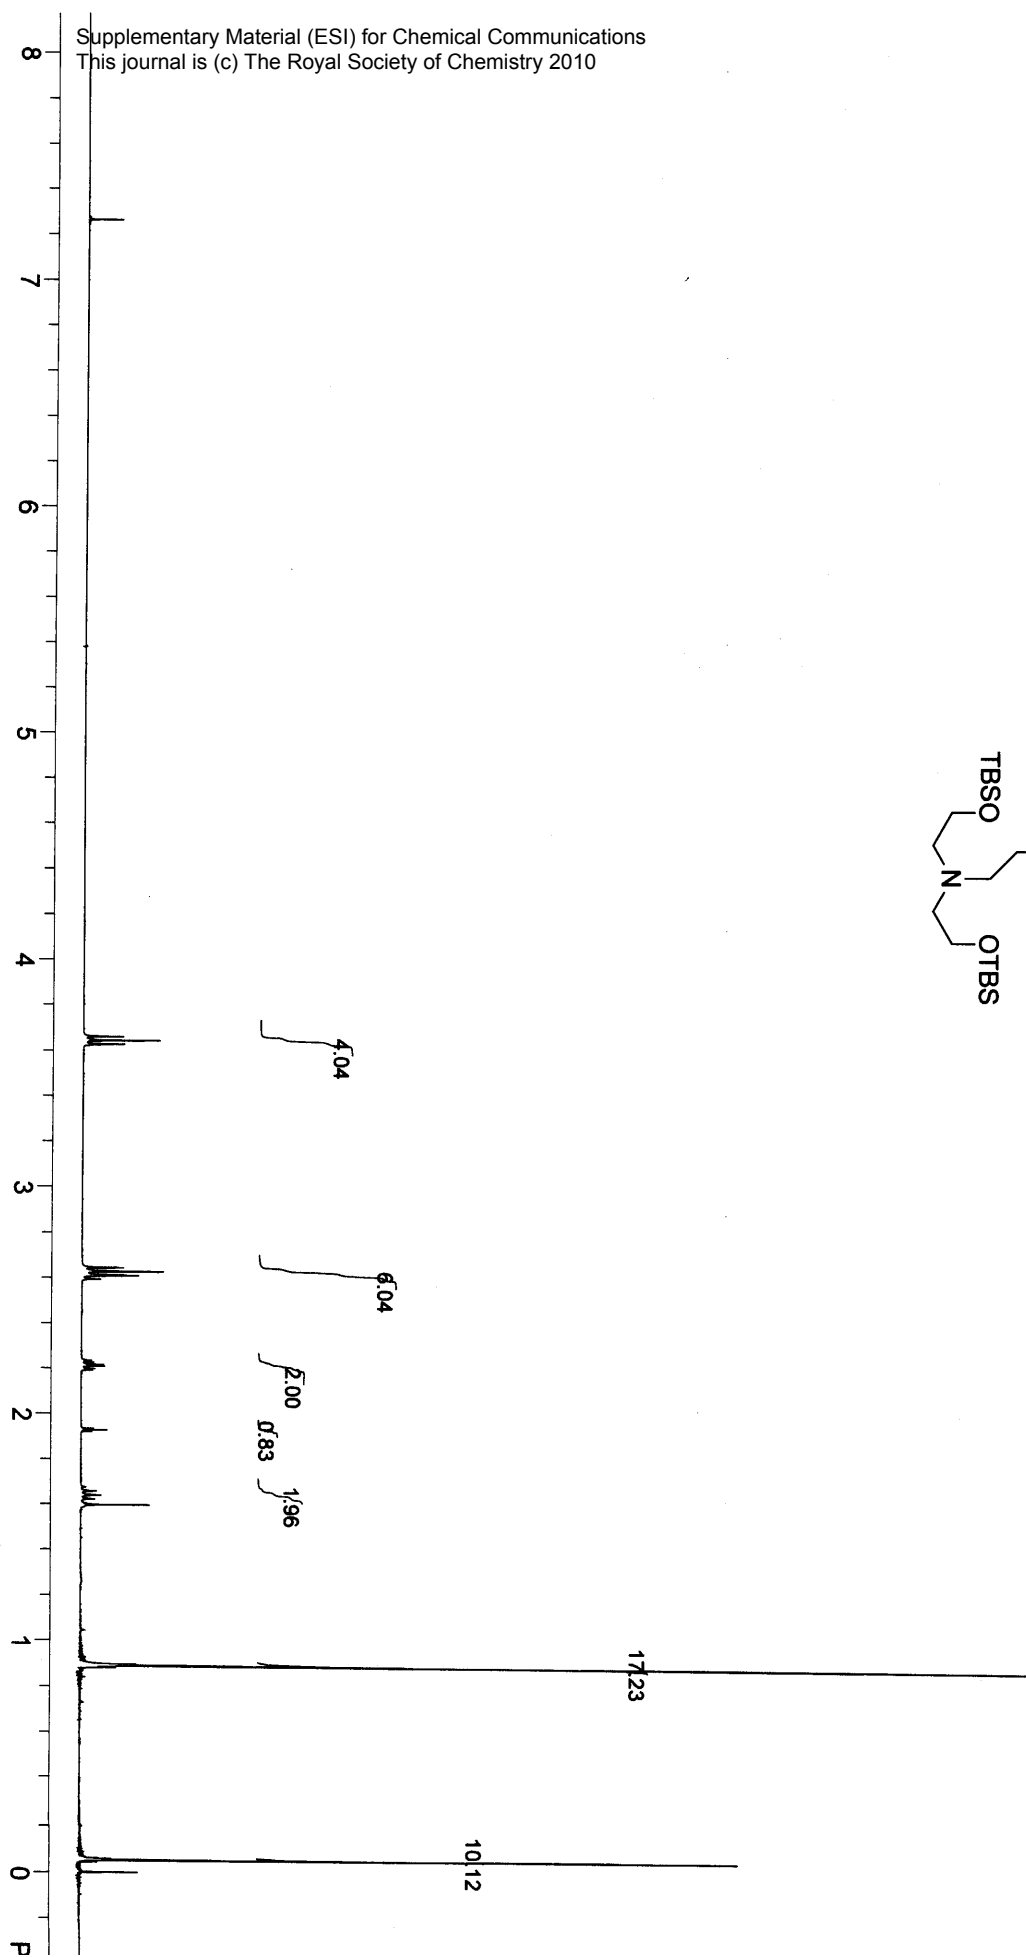

STANDARD CARBON PARAMETERS

Data Collected on:  
mmr500-inova500  
Archive directory:  
/export/home/vnmr1/vnmrSYS/data  
Sample directory:

File: CARBON

Pulse Sequence: s2pul  
Solvent: cdcl3

Temp. 22.0 C / 295.1 K  
Operator: lye

Relax. delay 3.000 sec  
Pulse 58.7 degrees  
Acq. time 1.300 sec  
Width 4000.0 Hz  
136 repetitions  
OBSERVE C13, 125.6889823 MHz  
DECUPLE H1, 499.8588575 MHz  
Power 36 dB  
on during acquisition  
off during delay  
WALTZ-16 modulated  
DATA PROCESSING  
Line broadening 0.5 Hz  
FT size 131072  
Total time 0 min

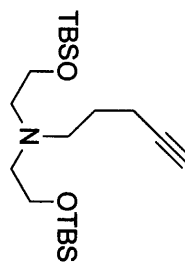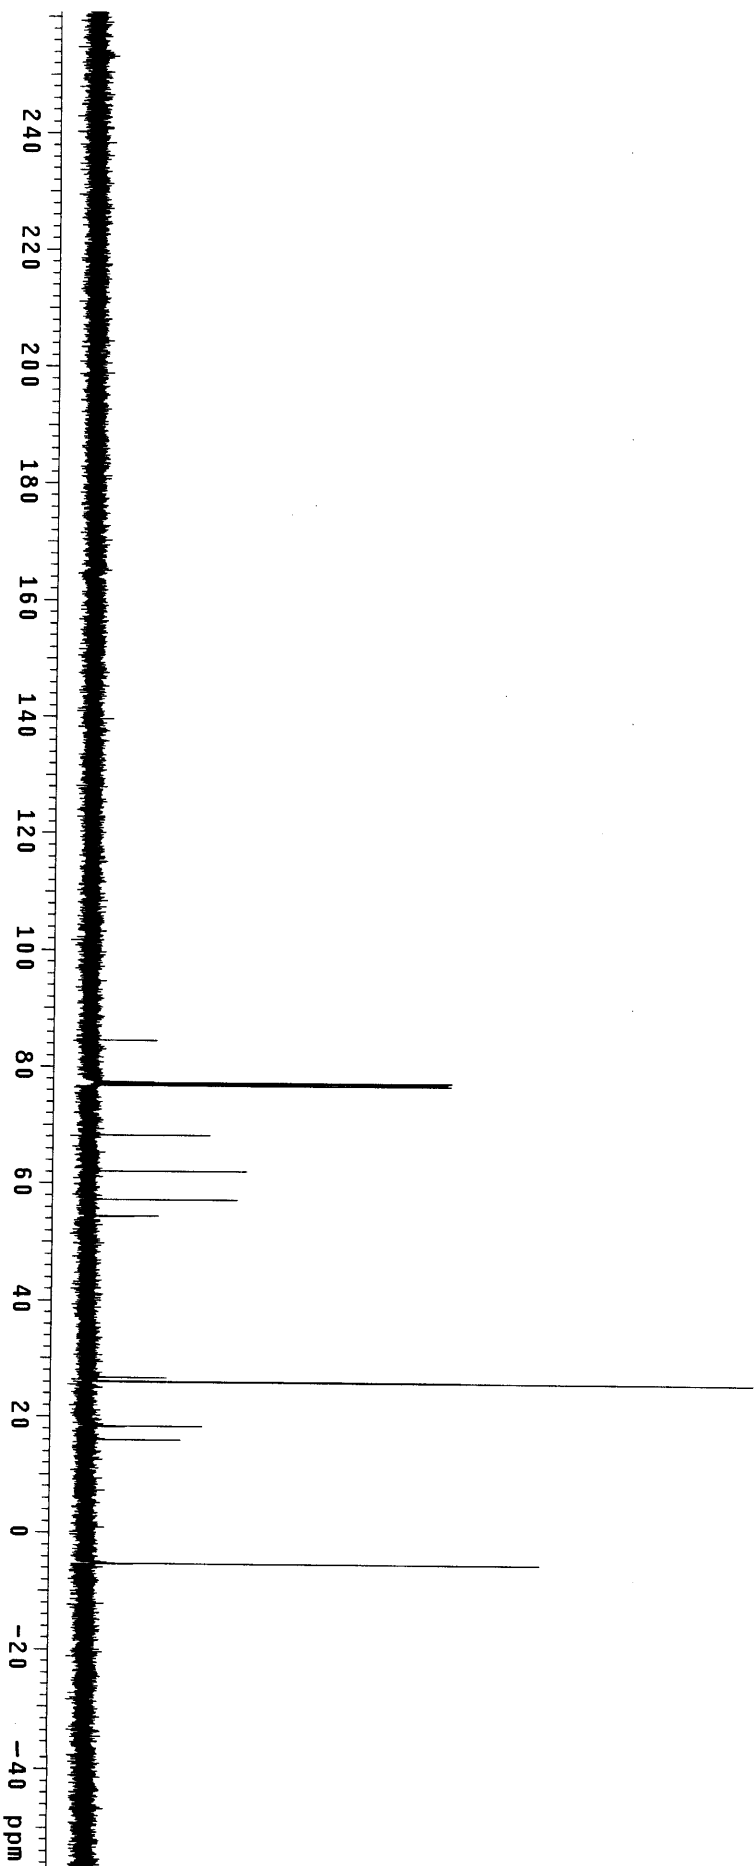

H1\_CDCL3

Data Collected on:  
nmr500-inova500  
Archive directory:  
/export/home/vnmr1/vnmrsys/data  
Sample directory:

File: H1

Pulse Sequence: szpul  
Solvent: cdcl3  
Operator: lcu1

Relax. delay 2.000 sec  
Pulse 56.8 degrees  
Acq. time 2.668 sec  
Width 5997.0 Hz  
12 repetitions  
OBSERVE H1, 499.8563618 MHz  
DATA PROCESSING  
Resol. enhancement -0.0 Hz  
FT size 32768  
Total time 0 min

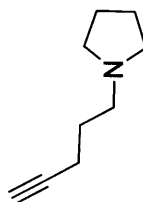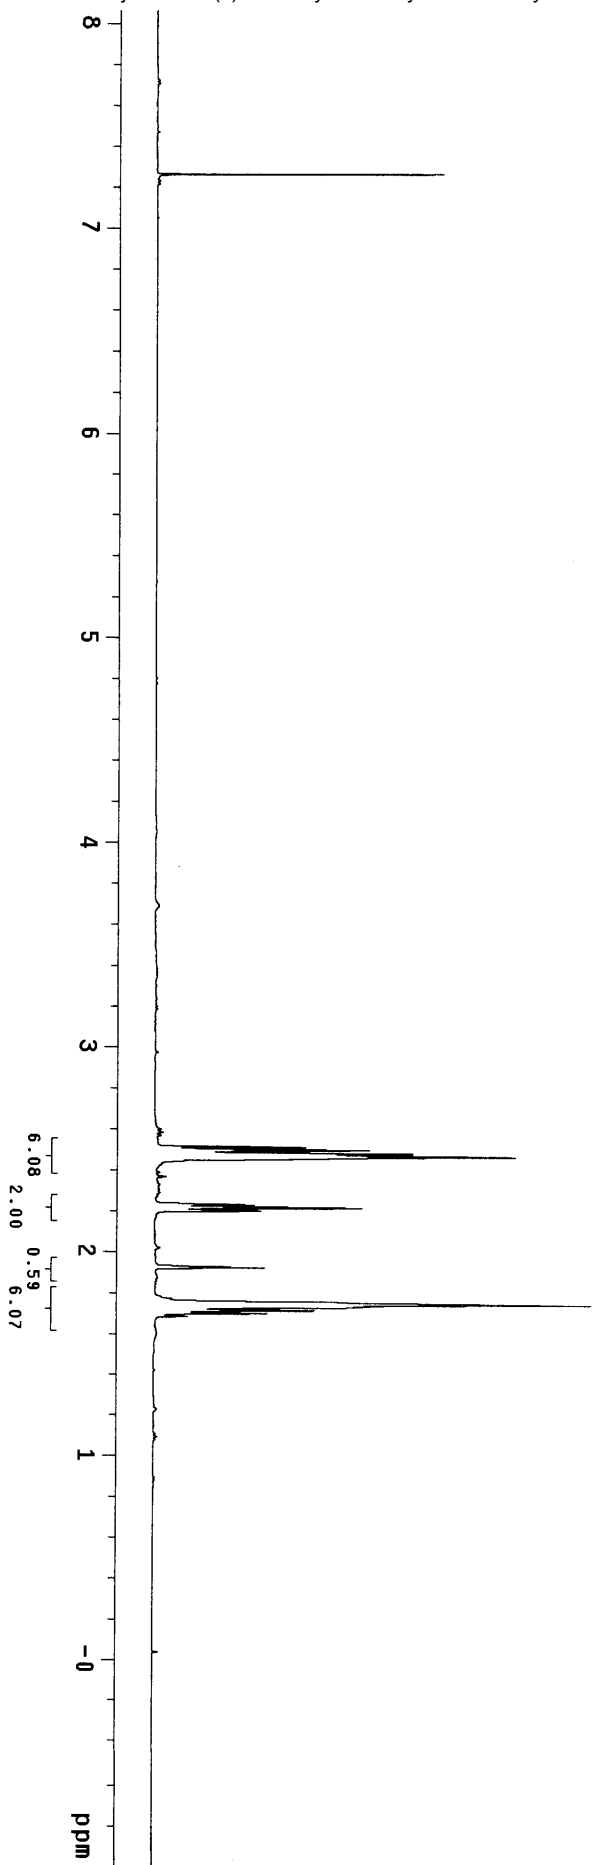

11cui-54-1

Automation directory: /home/walkup/vnmrSYS/data/auto\_2009.05.10  
File : exp  
Sample id : tmpstudy

Pulse Sequence: szpu1

Solvent: cdcl3  
Temp: 25.0 C / 298.1 K  
Operator: walkup  
VNMRS-500 "nmr-500"

Relax. delay 1.000 sec  
Pulse 45.0 degrees  
Acq. time 1.300 sec  
Width 30487.8 Hz  
7264 repetitions  
OBSERVE C13, 125.6732785 MHz  
DECOUPLE H1, 499.7964114 MHz  
Power 39 dB  
continuously on  
WALTZ-16 modulated  
DATA PROCESSING  
Line broadening 0.5 Hz  
FT size 131072  
Total time 12 hr, 49 min, 47 sec

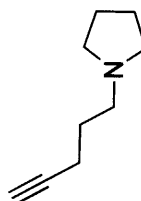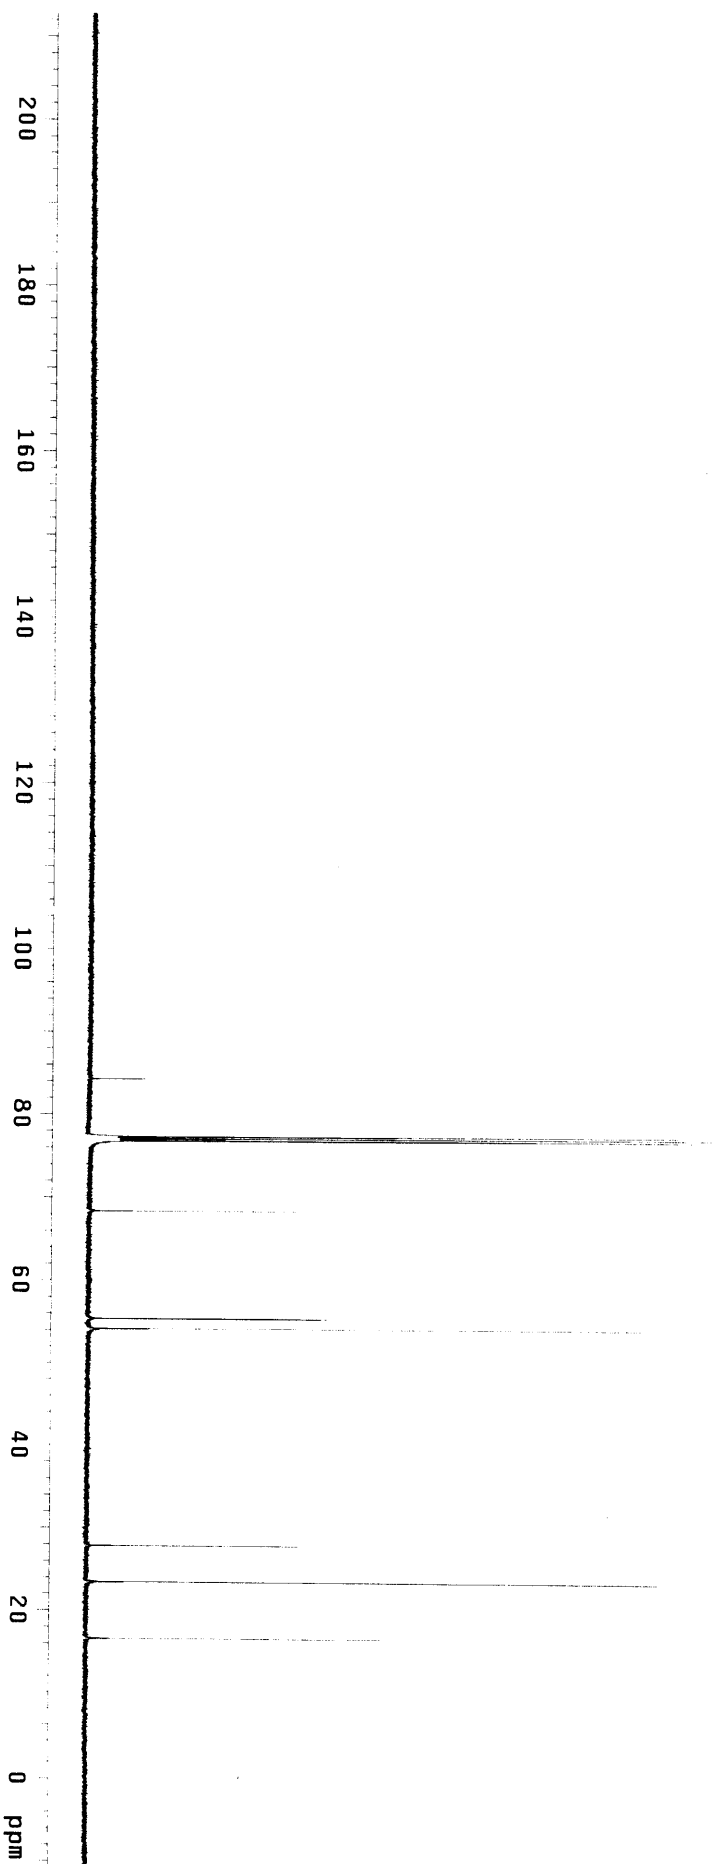

Z\*SPEC IDG400-5FE  
UCSB

Pulse Sequence: s2pu1  
Solvent: cdcl3  
Ambient temperature  
User: 1-12-87  
INOVA-400 "nmr-400"

Relax. delay 3.000 sec  
Pulse 48.5 degrees  
Acq. time 2.000 sec  
Width 5132.5 Hz  
20 repetitions  
OBSERVE H1, 399.9486720 MHz  
DATA PROCESSING  
Line broadening 0.1 Hz  
FT size 65536  
Total time 10 min, 41 sec

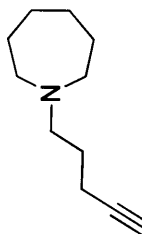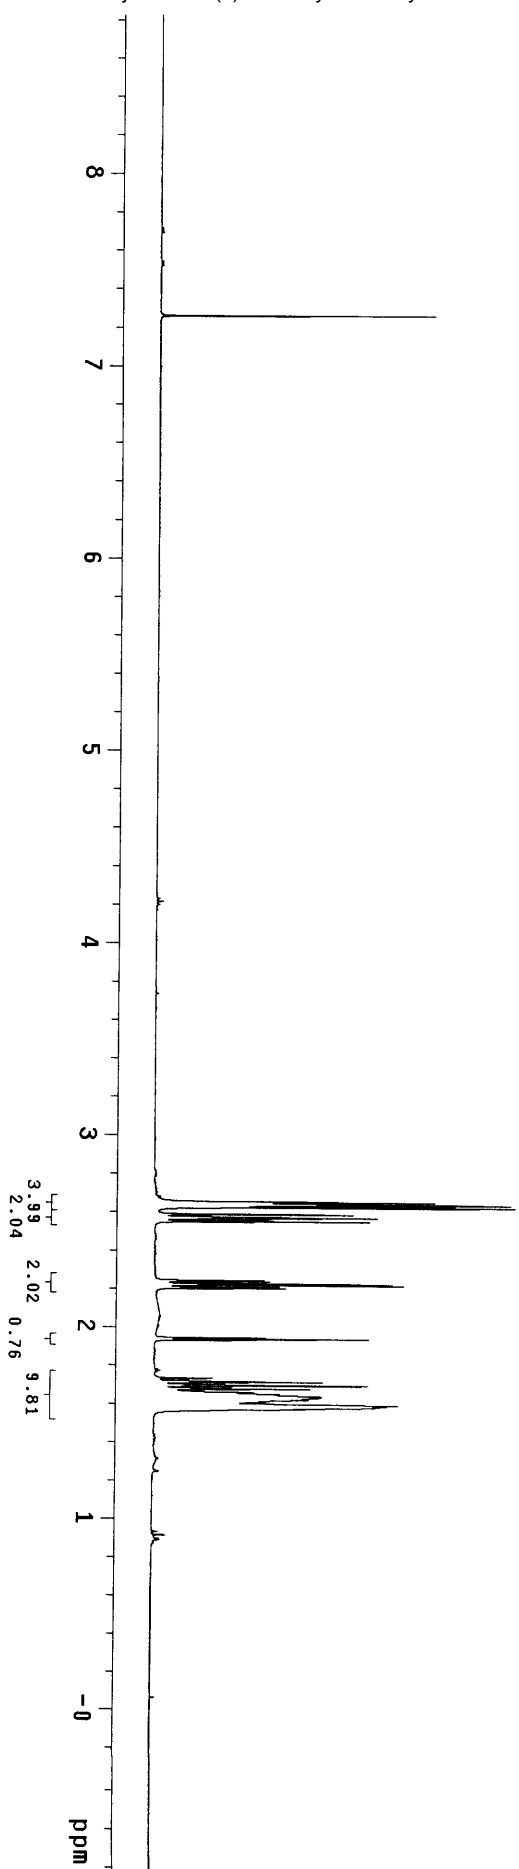

200  
150  
100  
50  
0 PPM

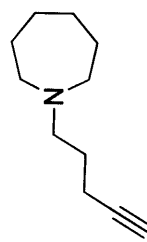

Z\*SPEC IDG400-SFE  
UCSB

Pulse Sequence: s2pul  
Solvent: cdcl3  
Ambient temperature  
User: 1-12-87  
INOVA-400 "nmr400"

Relax. delay 3.000 sec  
Pulse 48.5 degrees  
Acq. time 2.000 sec  
Width 5132.5 Hz  
24 repetitions  
OBSERVE H1 399.9486712 MHz  
DATA PROCESSING  
Line broadening 0.1 Hz  
FT size 65536  
Total time 10 min, 41 sec

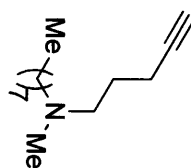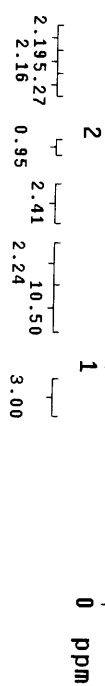

11cui-104-1-13C

Data Collected on:  
mmr500-inova500  
Archive directory:  
/export/home/vnmr1/vnmr500/data  
Sample directory:

File: CARBON

Pulse Sequence: szpul  
Solvent: cdcl3  
Temp: 22.0 C / 295.1 K  
Operator: 1cui

Relax. delay 3.000 sec  
Pulse 58.7 degrees  
Acq. time 1.300 sec  
Width 28258.6 Hz  
112 repetitions  
OBSERVE C13, 125.6889897 MHz  
DECOUPLE H1, 499.8588575 MHz  
Power 36 dB  
on during acquisition  
off during delay  
WALTZ-16 modulated  
DATA PROCESSING  
Line broadening 0.5 Hz  
FT size 131072  
Total time 0 min

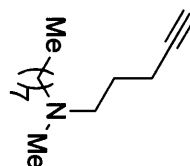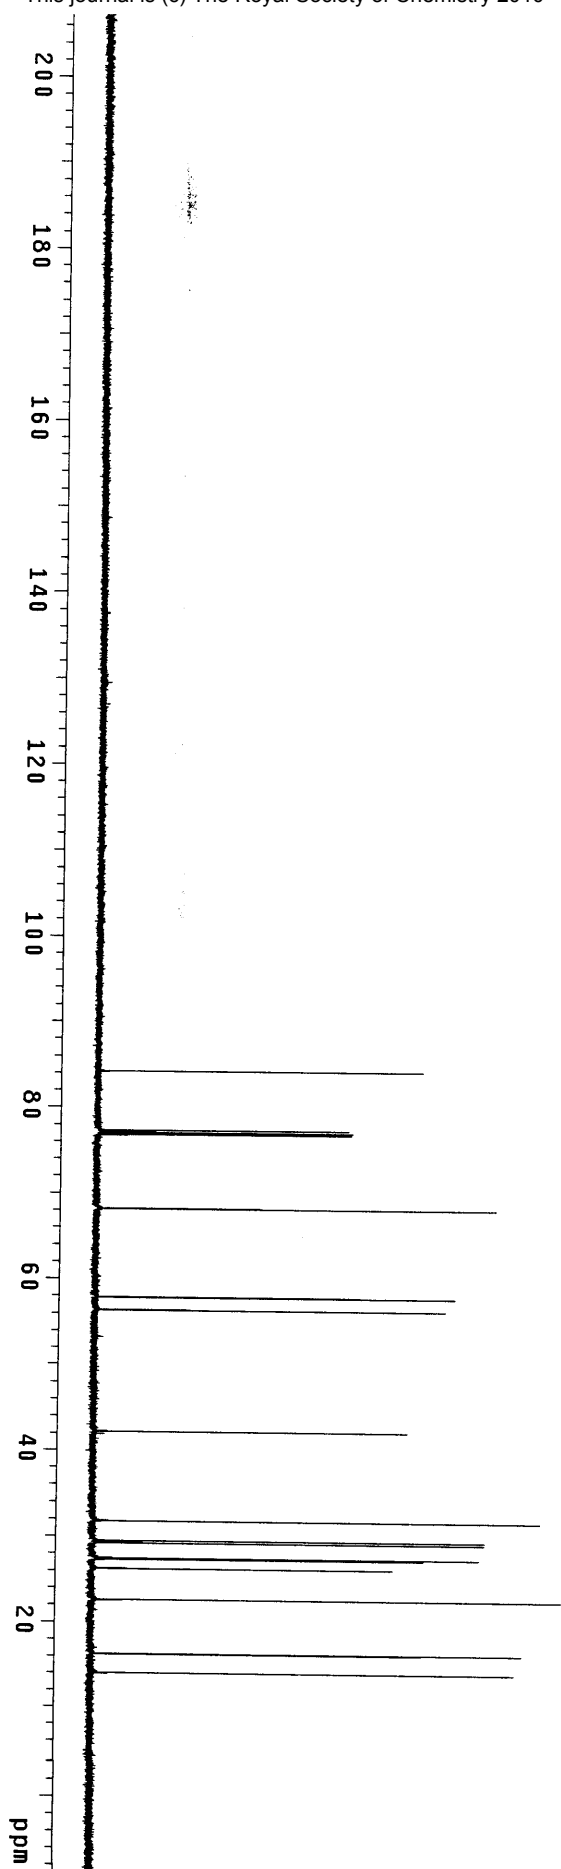

11cui-109-1-1H  
Pulse Sequence: szpu1  
Solvent: cdcl3  
Ambient temperature  
User: 1-12-87  
INOVA-400 "nmr400"

Relax. delay 3.000 sec  
Pulse 48.5 degrees  
Acq. time 2.000 sec  
Width 5132.5 Hz  
20 repetitions  
OBSERVE H1, 399.9486712 MHz  
DATA PROCESSING  
Line broadening 0.1 Hz  
FI size 65536  
Total time 10 min, 41 sec

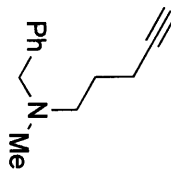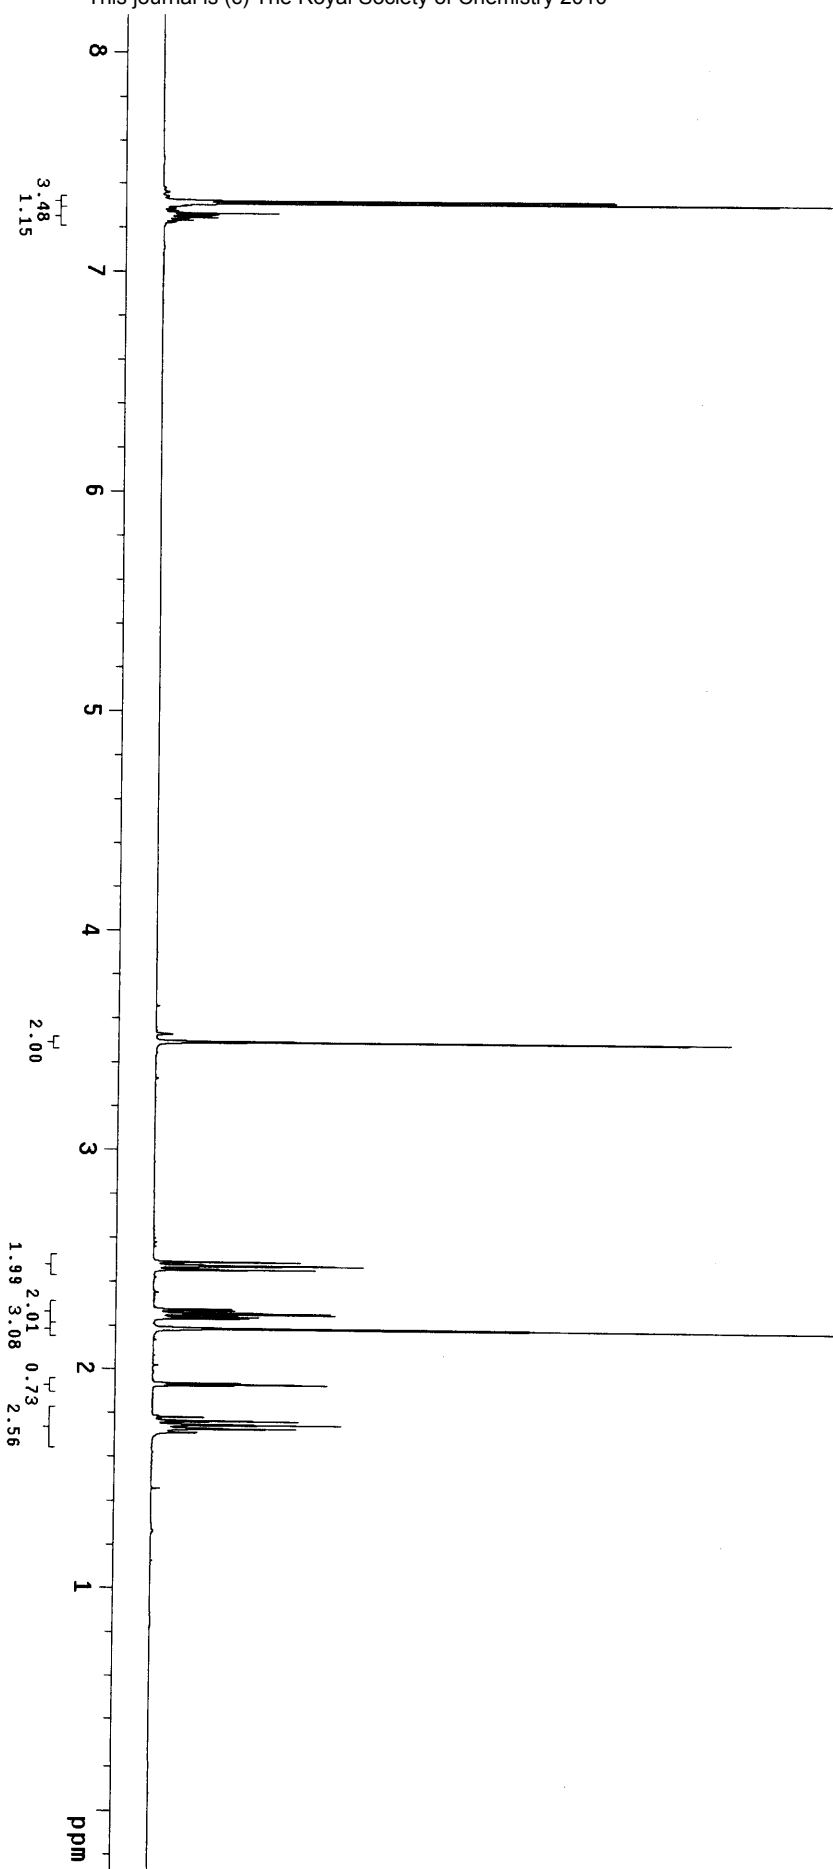

1lcui-109-1-13C

Data Collected on:  
nmr500-inova500  
Archive directory:  
/export/home/vnmr1/vnmrSYS/data  
Sample directory:

File: CARBON

Pulse Sequence: szpul  
Solvent: cdcl3

Temp. 25.0 C / 298.1 K  
Operator: lcui

Relax. delay 3.000 sec  
Pulse 58.7 degrees  
Acq. time 1.300 sec  
Width 28258.6 Hz  
71 repetitions  
OBSERVE C13, 125.6889879 MHz  
DECOUPLE H1, 499.8588575 MHz  
Power 36 dB  
on during acquisition  
off during delay  
WALTZ-16 modulated  
DATA PROCESSING  
Line broadening 1.0 Hz  
FT size 131072  
Total time 0 min

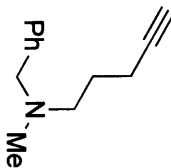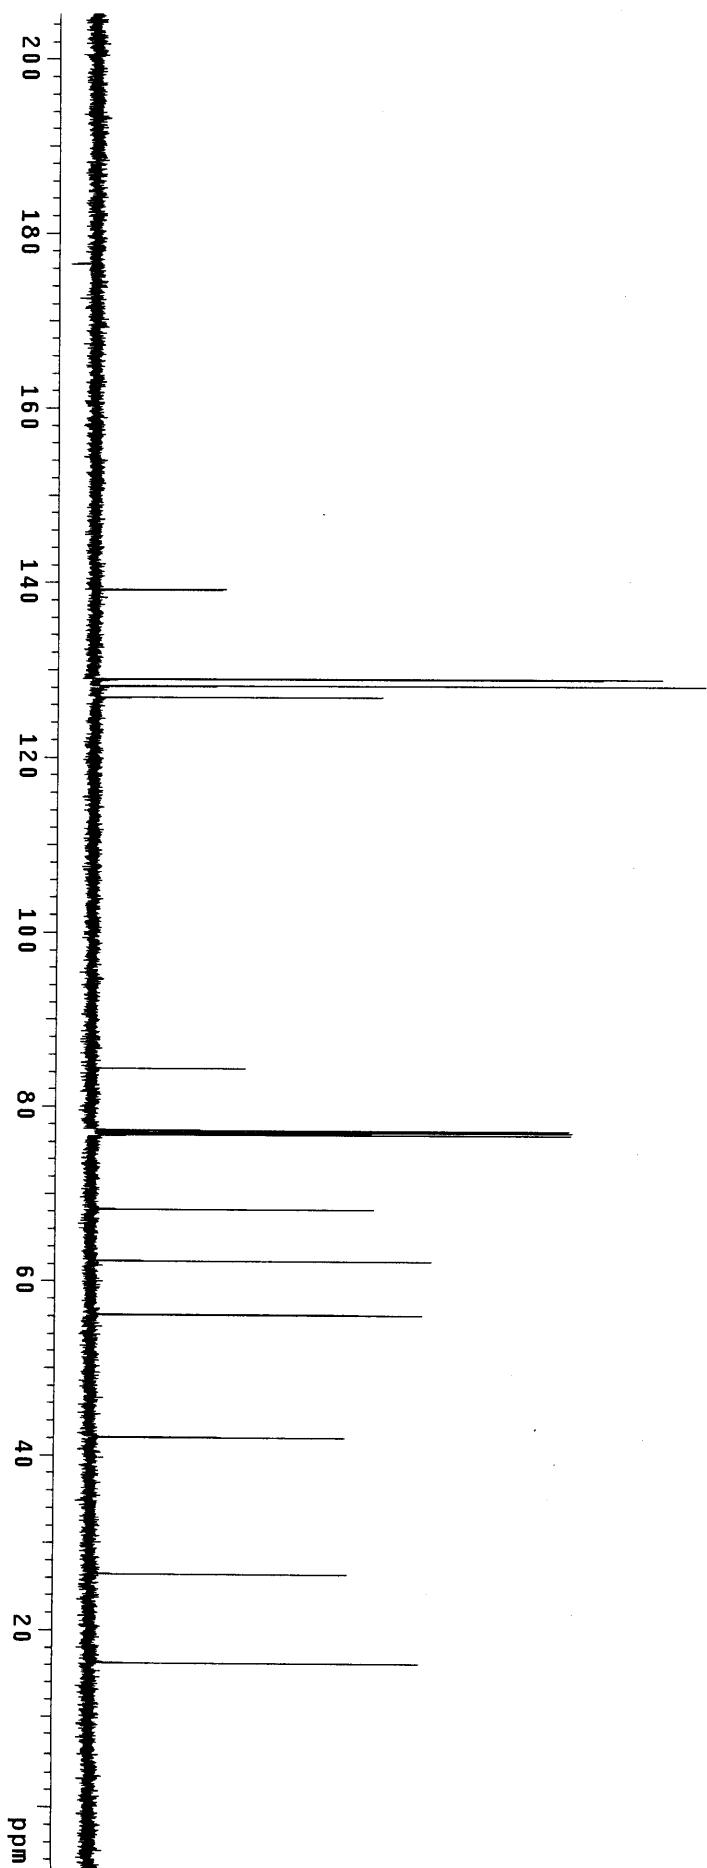

11uci-114-1-SM

Data Collected on:  
nmr500-inova500  
Archive directory:  
/export/home/vnmr1/vnmrSYS/data  
Sample directory:

File: H1

Pulse Sequence: szpul  
Solvent: cdcl3  
Operator: lcu1

Relax. delay 2.000 sec  
Pulse 56.8 degrees  
Acq. time 2.668 sec  
Width 5997.0 Hz  
4 repetitions  
OBSERVE H1, 499.8563607 MHz  
DATA PROCESSING  
Resol. enhancement -0.0 Hz  
F1 size 32768  
Total time 0 min

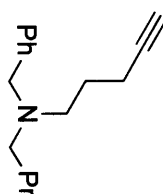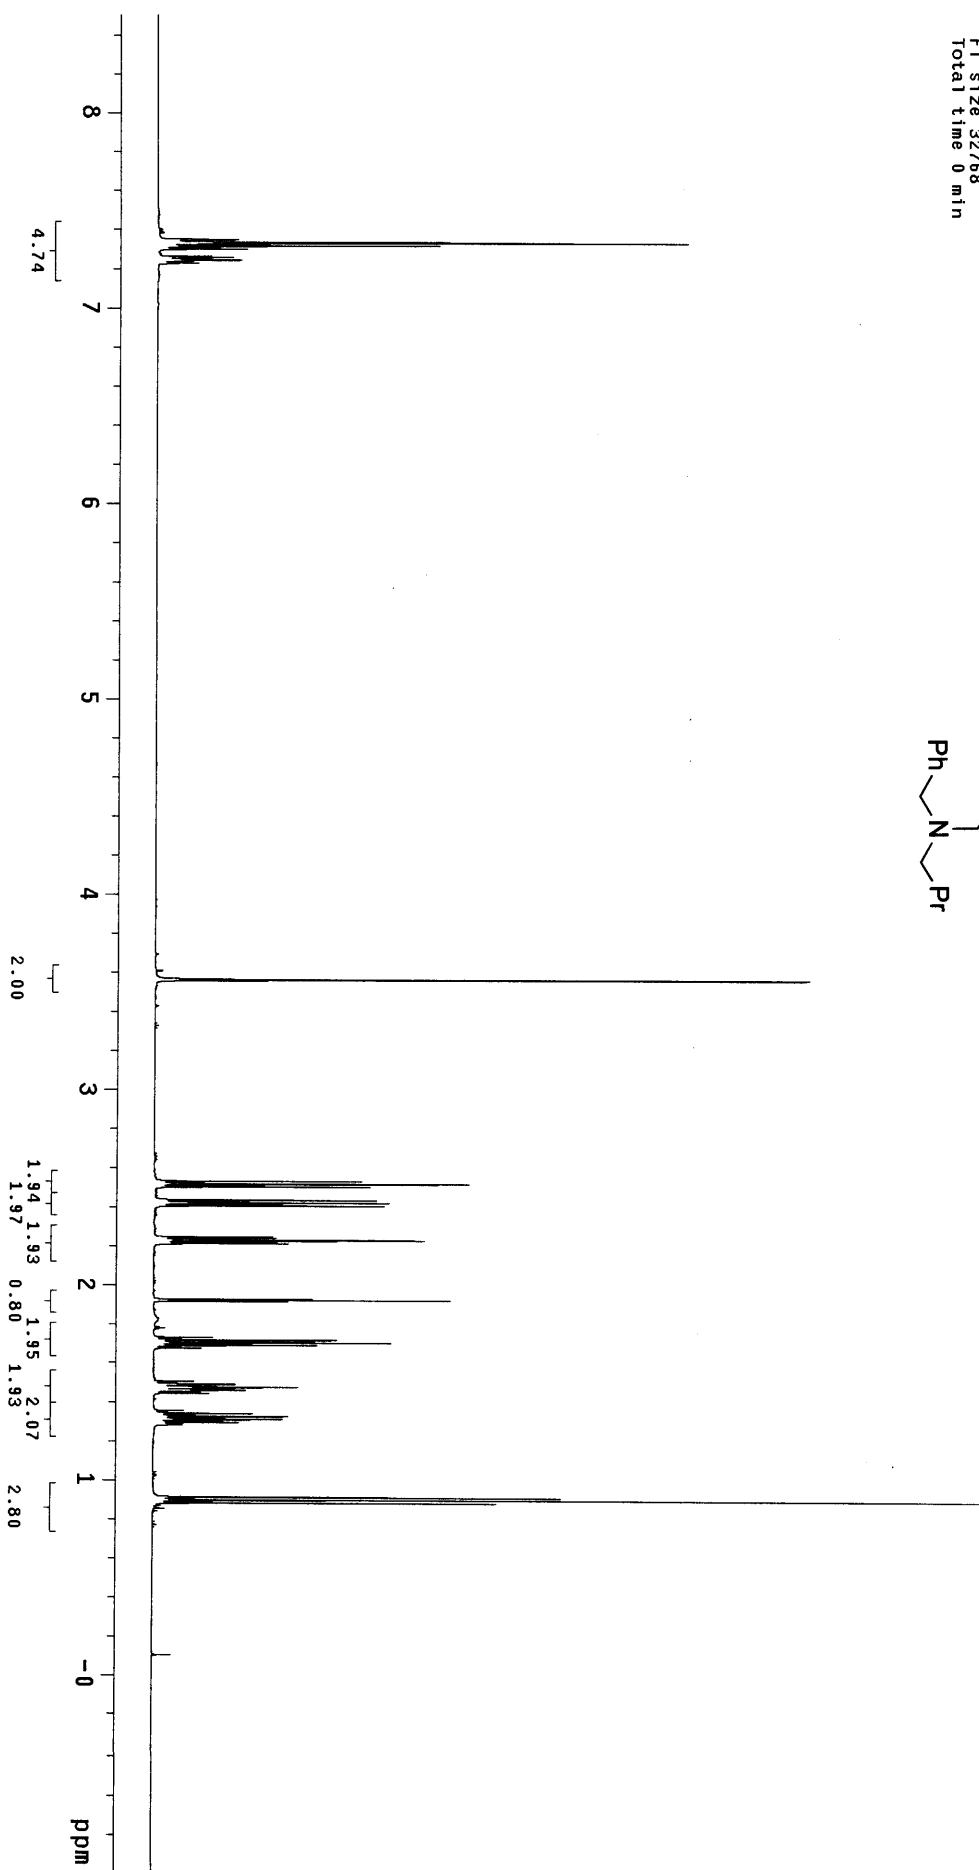

11uci-114-1-SM-13C

Data Collected on:  
nmr500-inova500  
Archive directory:  
/export/home/vnmr1/vnmrSYS/data  
Sample directory:

File: CARBON

Pulse Sequence: szpul  
Solvent: cdcl3  
Temp. 25.0 C / 298.1 K  
Operator: lcu1

Relax. delay 3.000 sec  
Pulse 58.7 degrees  
Acq. time 1.300 sec  
Width 28258.6 Hz  
47 repetitions  
OBSERVE C13, 125.688935 MHz  
DECOUPLE H1, 499.858575 MHz  
Power 36 dB  
on during acquisition  
off during delay  
WALTZ-16 modulated  
DATA PROCESSING  
Line broadening 1.0 Hz  
Ft size 131072  
Total time 0 min

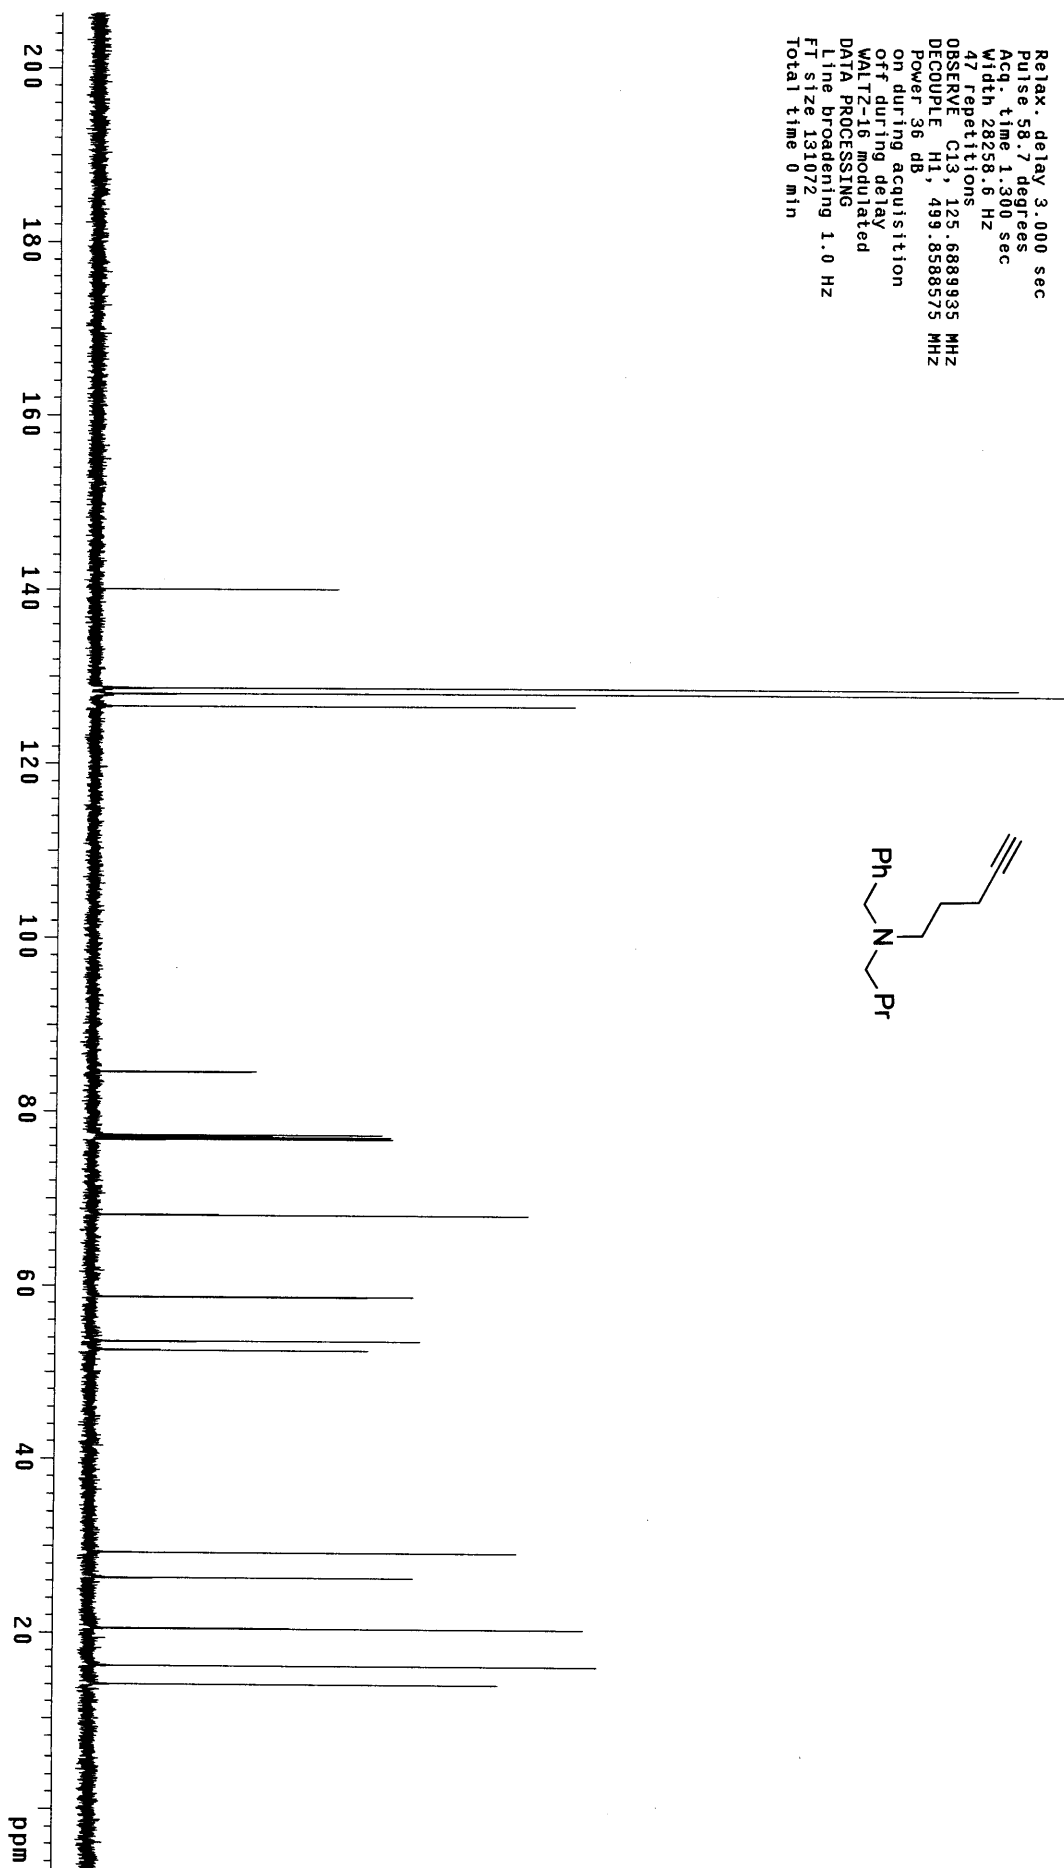

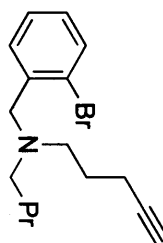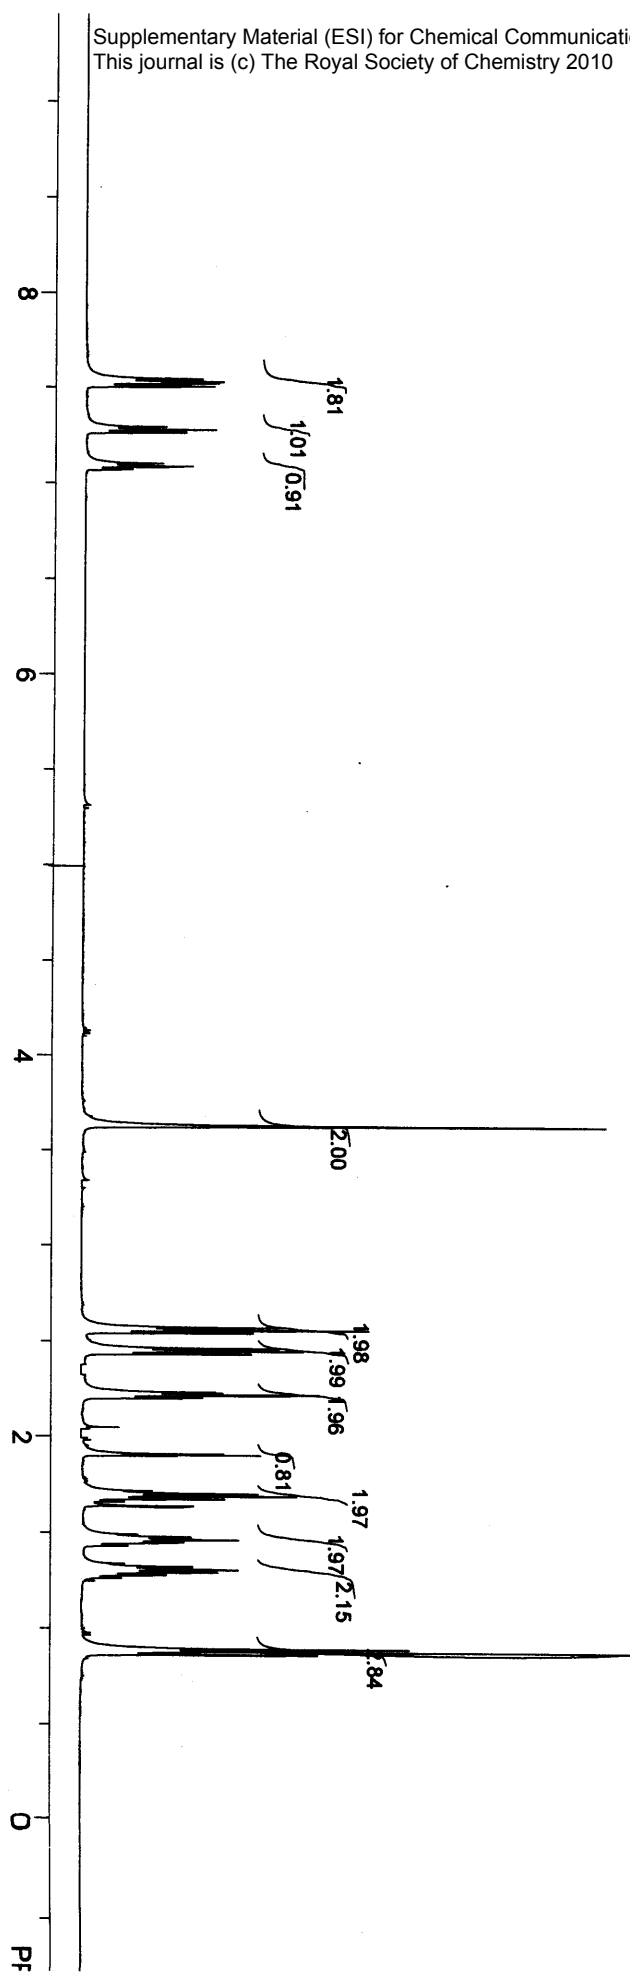

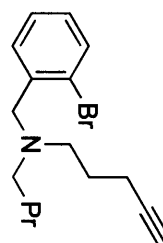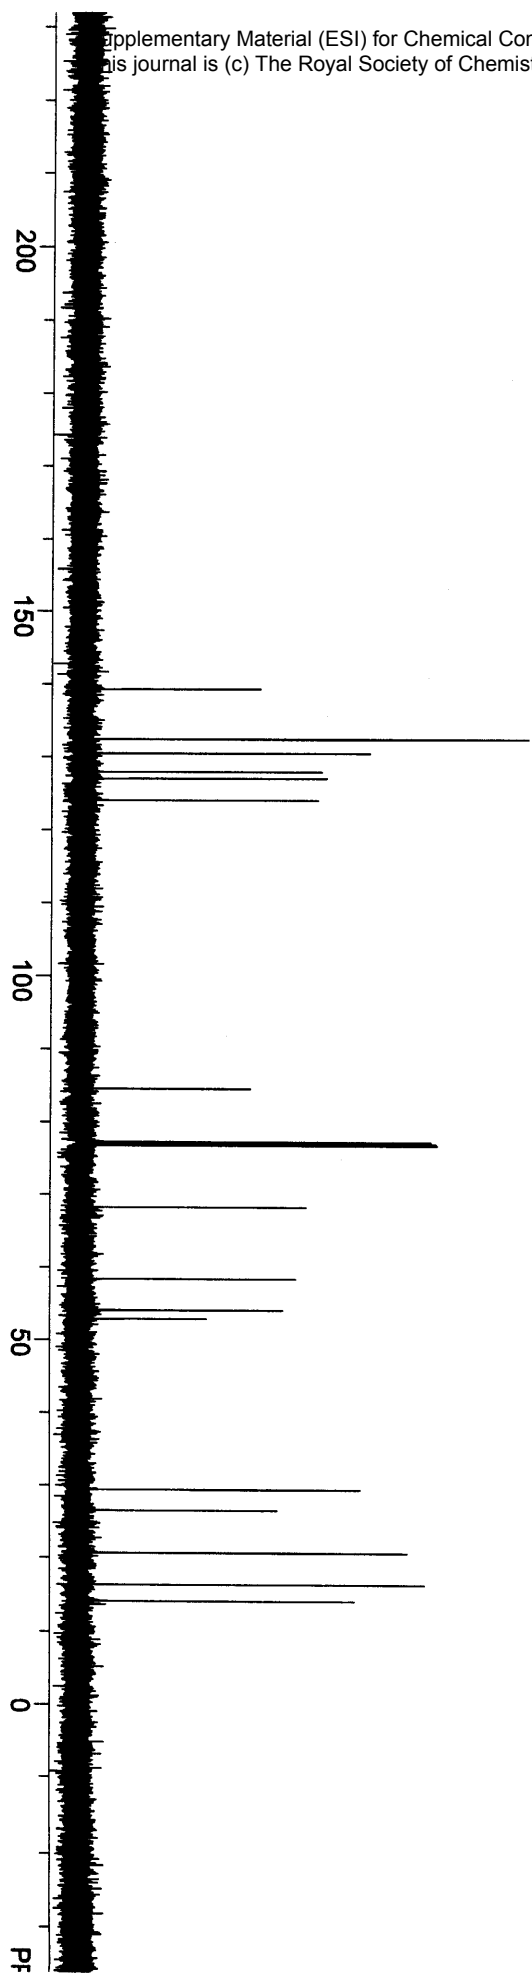

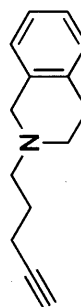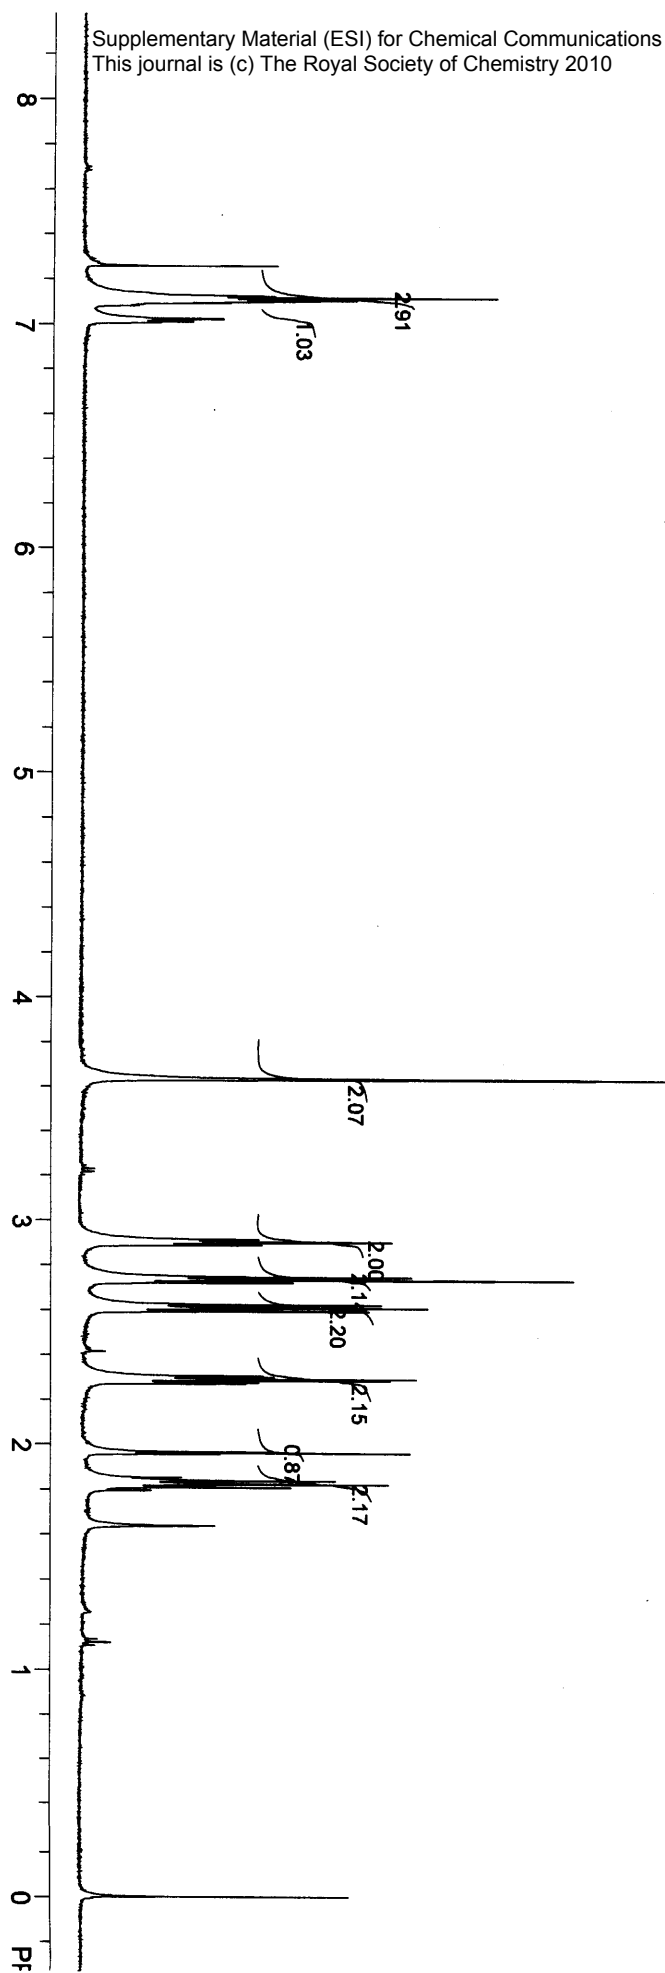

STANDARD CARBON PARAMETERS

Data Collected on:  
nmr500-inova500  
Archive directory:  
/export/home/vnmr1/vnmrSYS/data  
Sample directory:

File: CARBON

Pulse Sequence: szpul  
Solvent: cac13  
Temp: 21.9 C / 295.1 K  
Operator: iye

Relax. delay 3.000 sec  
Pulse 58.7 degrees  
Acq. time 1.300 sec  
Width 28258.6 Hz  
86 repetitions  
OBSERVE C13, 125.6889897 MHz  
DECOUPLE H1, 499.8588575 MHz  
Power 36 dB  
on during acquisition  
off during delay  
WALTZ-16 modulated  
DATA PROCESSING  
Line broadening 0.5 Hz  
FT size 131072  
Total time 0 min

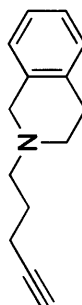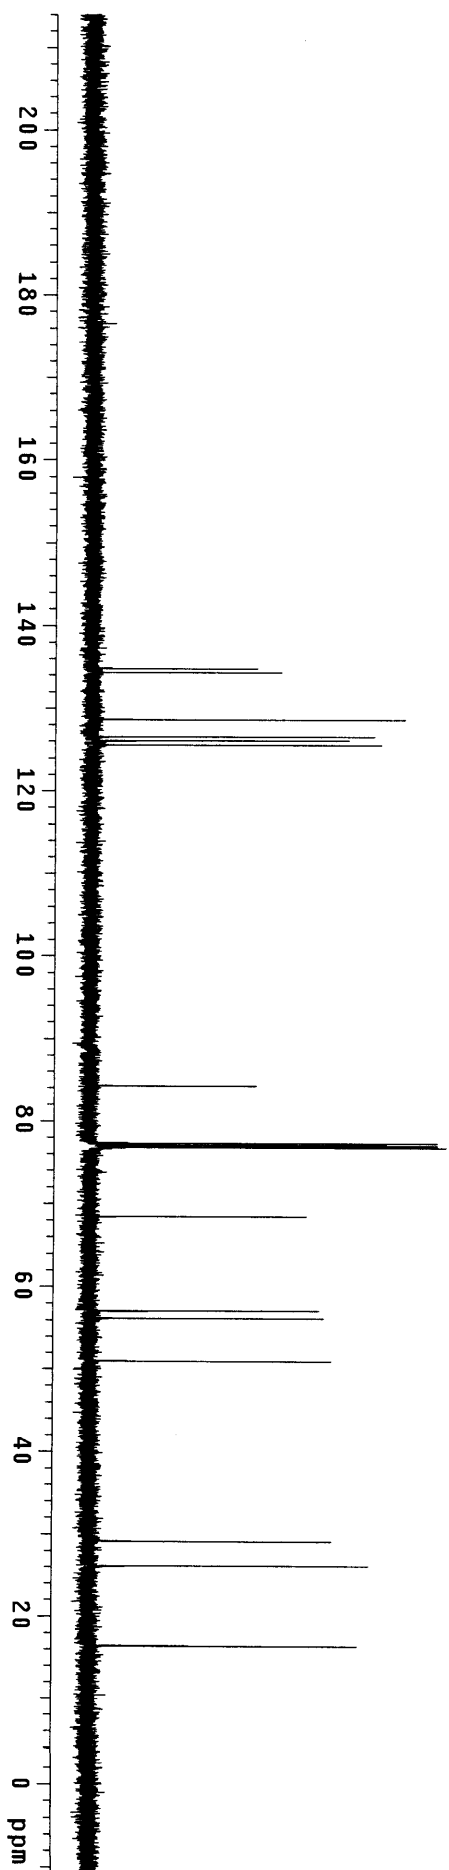

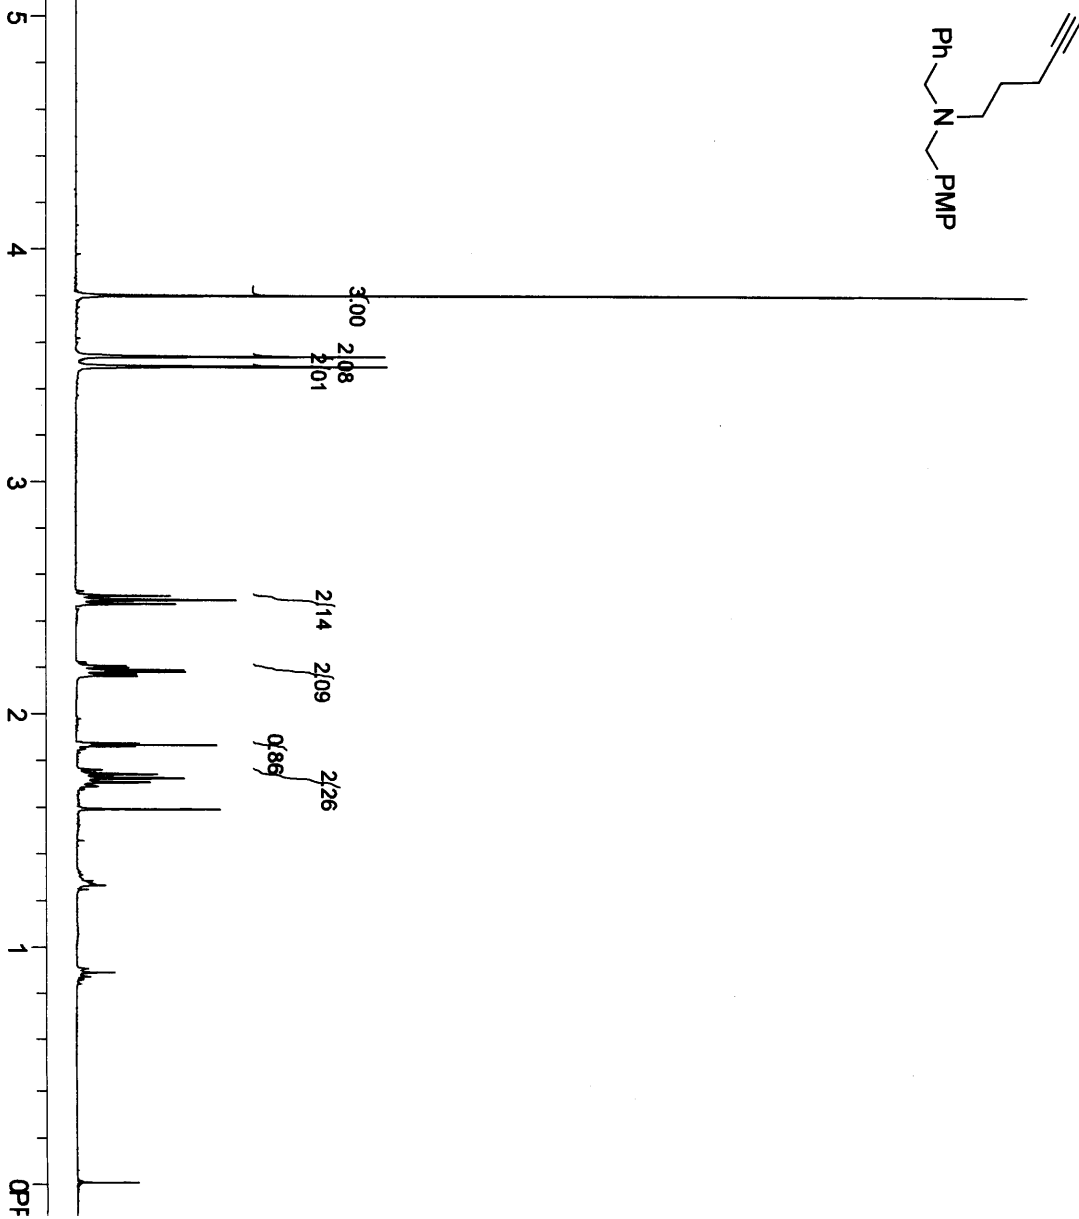

250  
200  
150  
100  
50  
0  
PPM

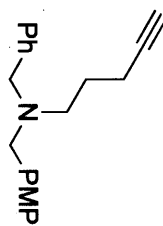

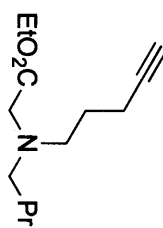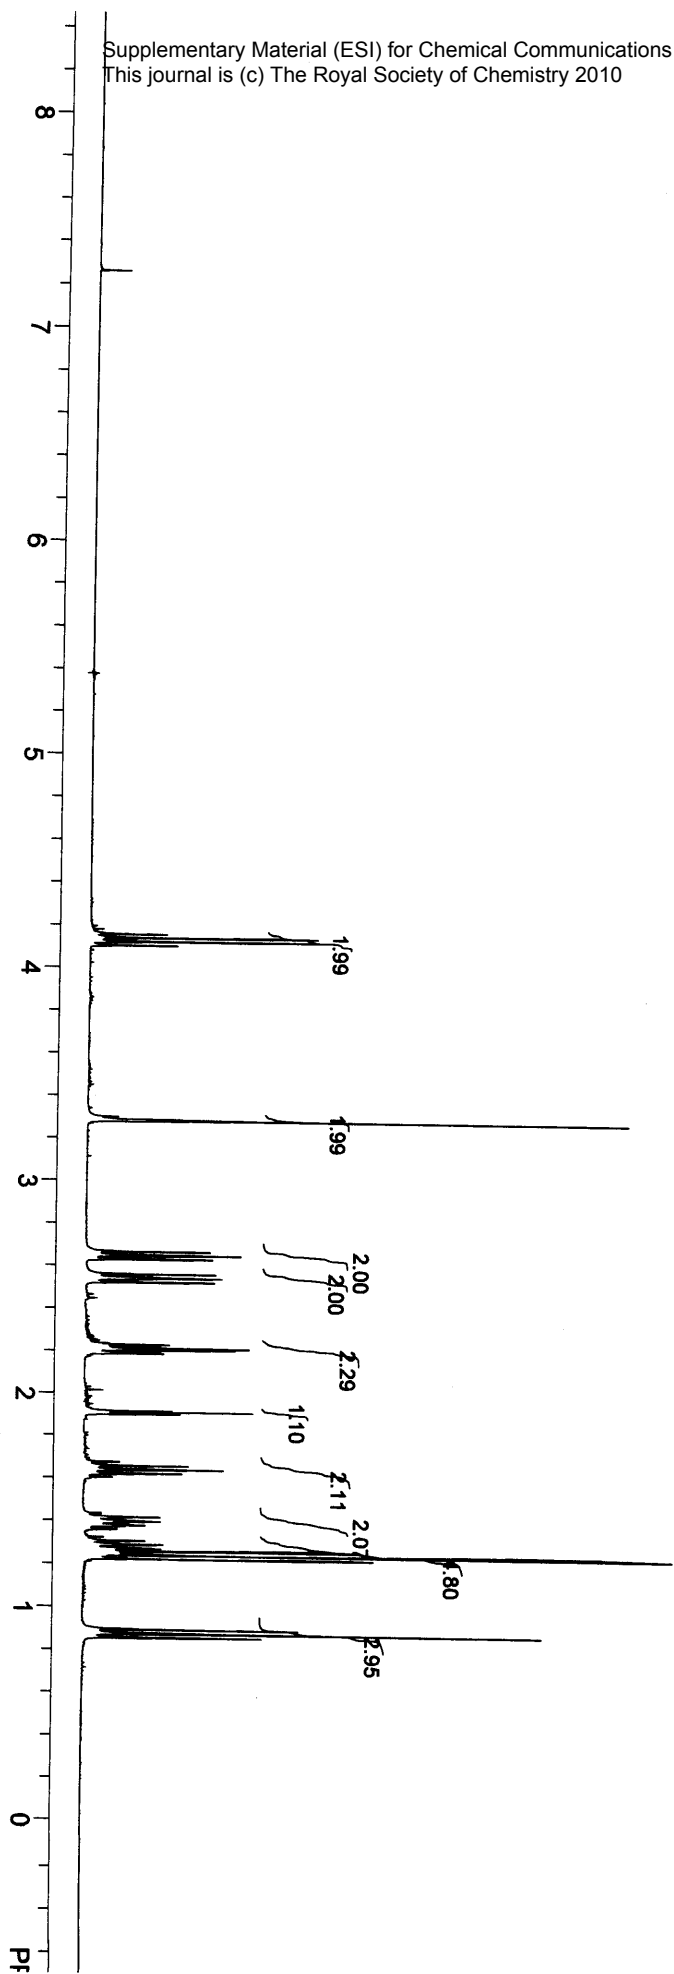

# STANDARD CARBON PARAMETERS

Data Collected on:

nmr500-inova500

Archive directory:

/export/home/vnmr1/vnmrSYS/data

Sample directory:

File: CARBON

Pulse Sequence: szpul

Solvent: cdcl3

Temp. 22.0 C / 295.1 K

Operator: iye

Relax. delay 3.000 sec

Pulse 58.7 degrees

Acq. time 1.380 sec

Width 40000.0 Hz

14 repetitions

OBSERVE C13, 125.6889872 MHz

DECOUPLE H1, 499.858575 MHz

Power 36 dB

on during acquisition

off during delay

WALTZ-16 modulated

DATA PROCESSING

Line broadening 0.5 Hz

FT size 131072

Total time 0 min

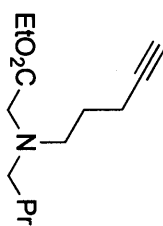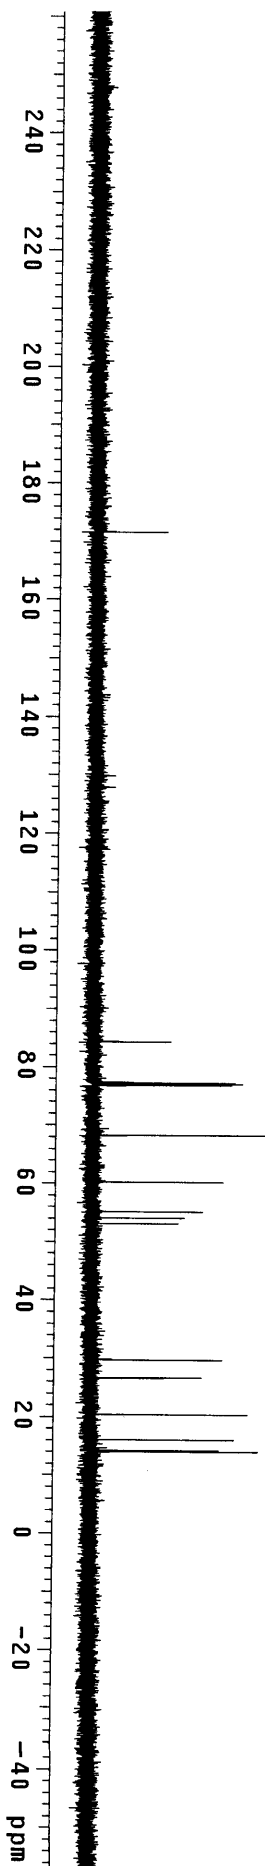

11cui-70-2-1H

Automation directory: /home/walkup/vnmr.sys/data/auto\_2009.05.28\_17  
File : exp  
Sample id : tmpstudy

Pulse Sequence: s2pu1  
Solvent: cdcl3  
Temp: 25.0 C / 298.1 K  
Operator: walkup  
VNMRS-400 "mr400"

Relax. delay 1.000 sec  
Pulse 45.0 degrees  
Acq. time 2.049 sec  
Width 6410.3 Hz  
28 repetitions  
OBSERVE H1 400.0565418 MHz  
DATA PROCESSING  
Resol. enhancement -0.0 Hz  
FT size 65536  
Total time 6 min, 31 sec

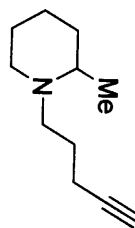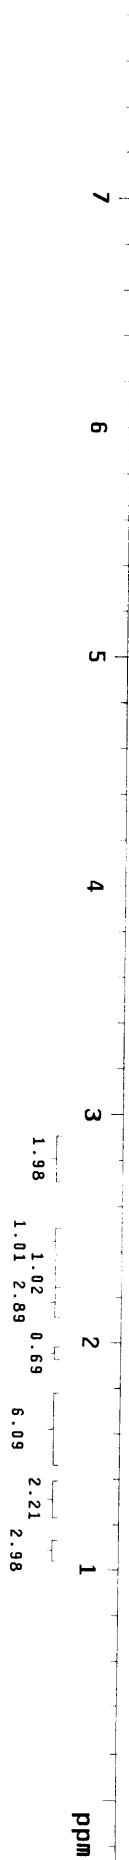

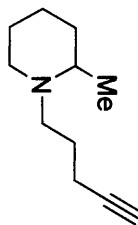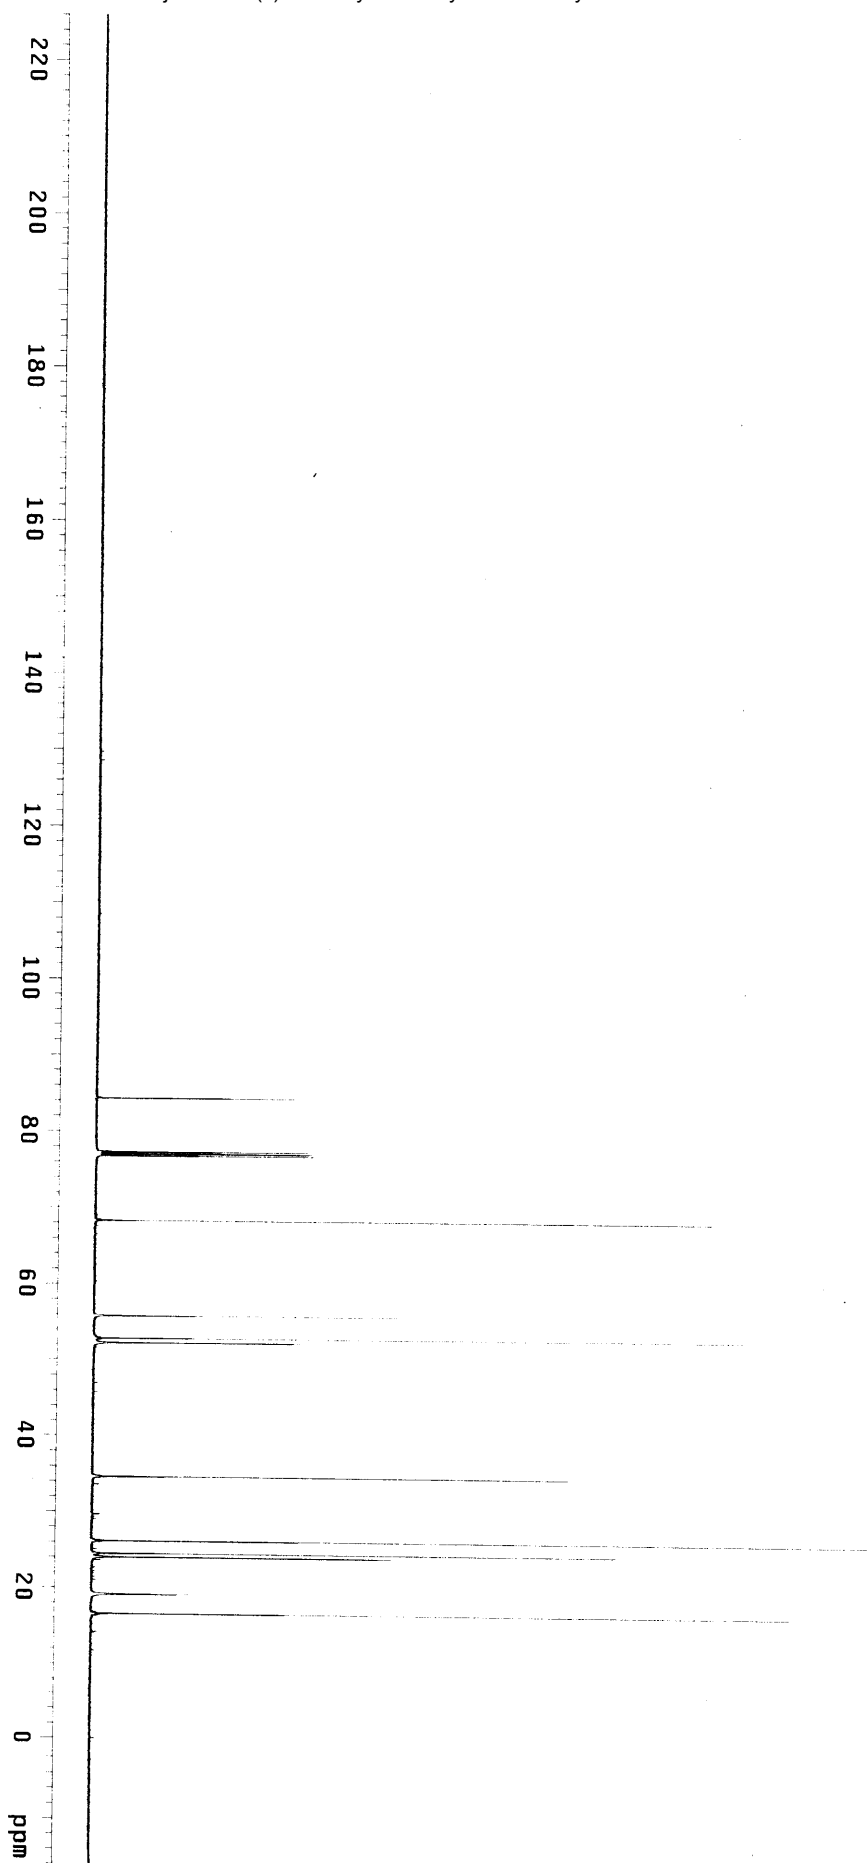

Automation directory: /home/walkup/vnmr5ys/data/auto\_2009.06.04\_06  
File: exp  
Sample id: tmpstudy  
Pulse Sequence: s2pul  
Solvent: cdcl3  
Temp: 25.0 C / 298.1 K  
Operator: walkup  
VNMR5-500 "nmr500"  
Relax. delay 1.000 sec  
Pulse 45.0 degrees  
Acq. time 2.049 sec  
Width 8012.8 Hz  
28 repetitions  
OBSERVE H1, 499.7939123 MHz  
DATA PROCESSING  
Line broadening 0.2 Hz  
FT size 65536  
Total time 6 min, 37 sec

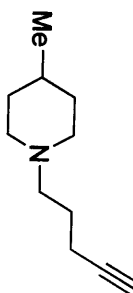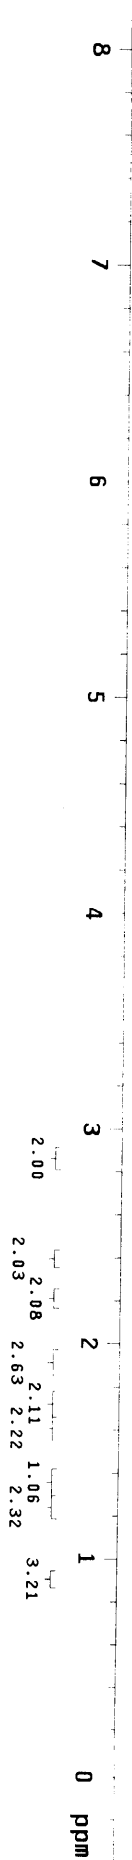

```
Automation directory: /home/walkup/vnmrsys/data/auto_2009.06.05_01
File : /mnt/argenta/nmr500/data/Zhang/11cui/11cui-72-1-C13.fid
Sample id : tmpstudy
```

ulse Sequence: szpuj

Solvent:  $\text{cdCl}_3$ 

operator: walkup

JMR5-500 "nmr500"

45.0 degrees

width 30487.8 Hz

SERVE C13 125

COUPLE H1, 499.7964114 MHZ

continuously on

## DATA PROCESSING

size 131072

total time 12 hr, 49 min, 47 sec

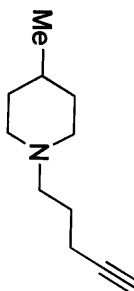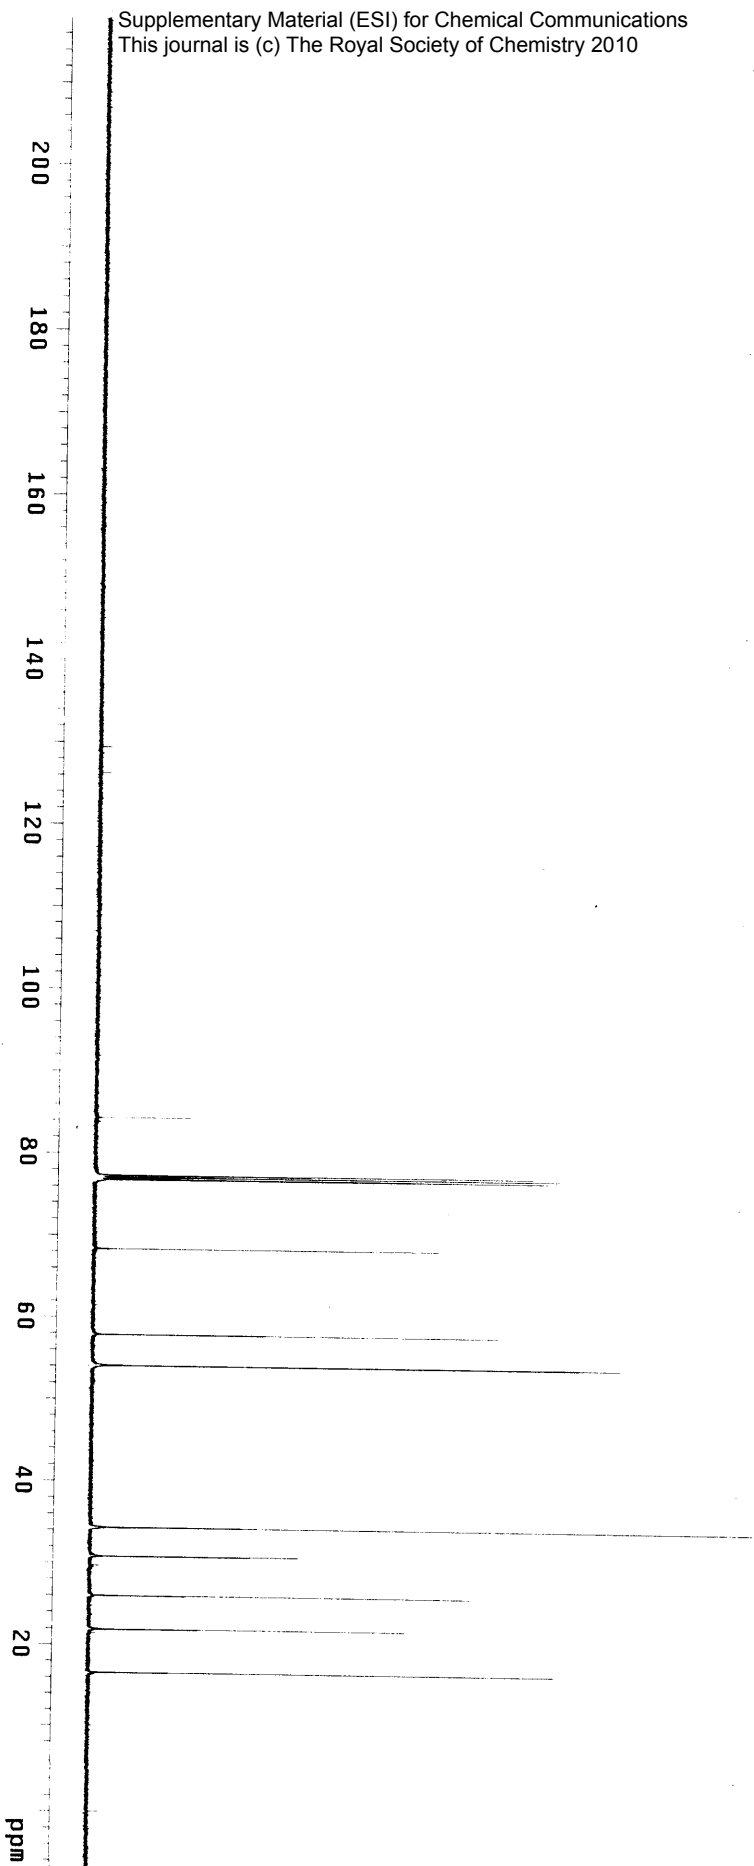

1tcut-131-2

Data Collected on:  
nmr500-inova500  
Archive directory:  
/export/home/vnmr1/vnmrsys/data  
Sample directory:

File: H1

Pulse Sequence: szpu1  
Solvent: cdcl3  
Operator: tcut

Relax. delay 2.000 sec  
Pulse 56.8 degrees  
Acq. time 2.668 sec  
Width 5937.0 Hz  
24 Repetitions  
OBSERVE H1, 499.8563621 MHz  
DATA PROCESSING  
Resol. enhancement -0.0 Hz  
FT size 32768  
Total time 0 min

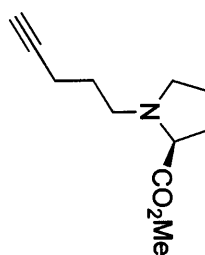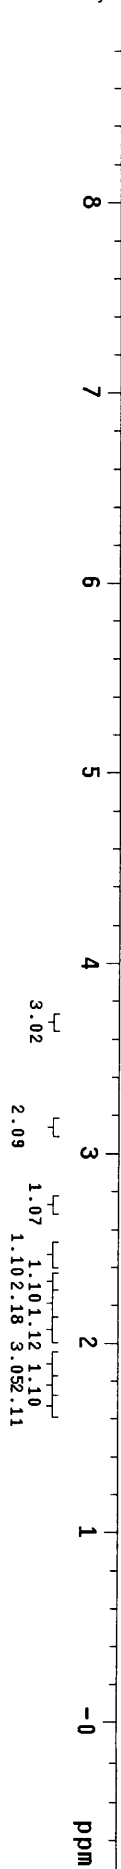

1icui-131-1-13C

Data Collected on:  
nmr500-inova500  
Archive directory:  
/export/home/vnmr1/vnmrsys/data  
Sample directory:

File: CARBON

Pulse Sequence: szpu1  
Solvent: cdcl3  
Temp: 24.7 C / 297.9 K  
Operator: icui

Relax. delay 3.000 sec  
Pulse: 58.7 degrees  
Acq. time 1.500 sec  
Width 28258.6 Hz  
48 repetitions  
OBSERVE C13, 125.688901 MHz  
DECOUPLE H1, 499.858575 MHz  
Power 36 dB  
on during acquisition  
off during delay  
WALTZ-16 modulated  
DATA PROCESSING  
Line broadening 1.0 Hz  
FT size 131072  
Total time 0 min

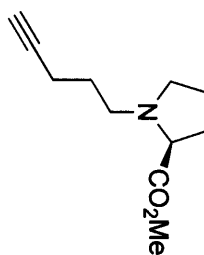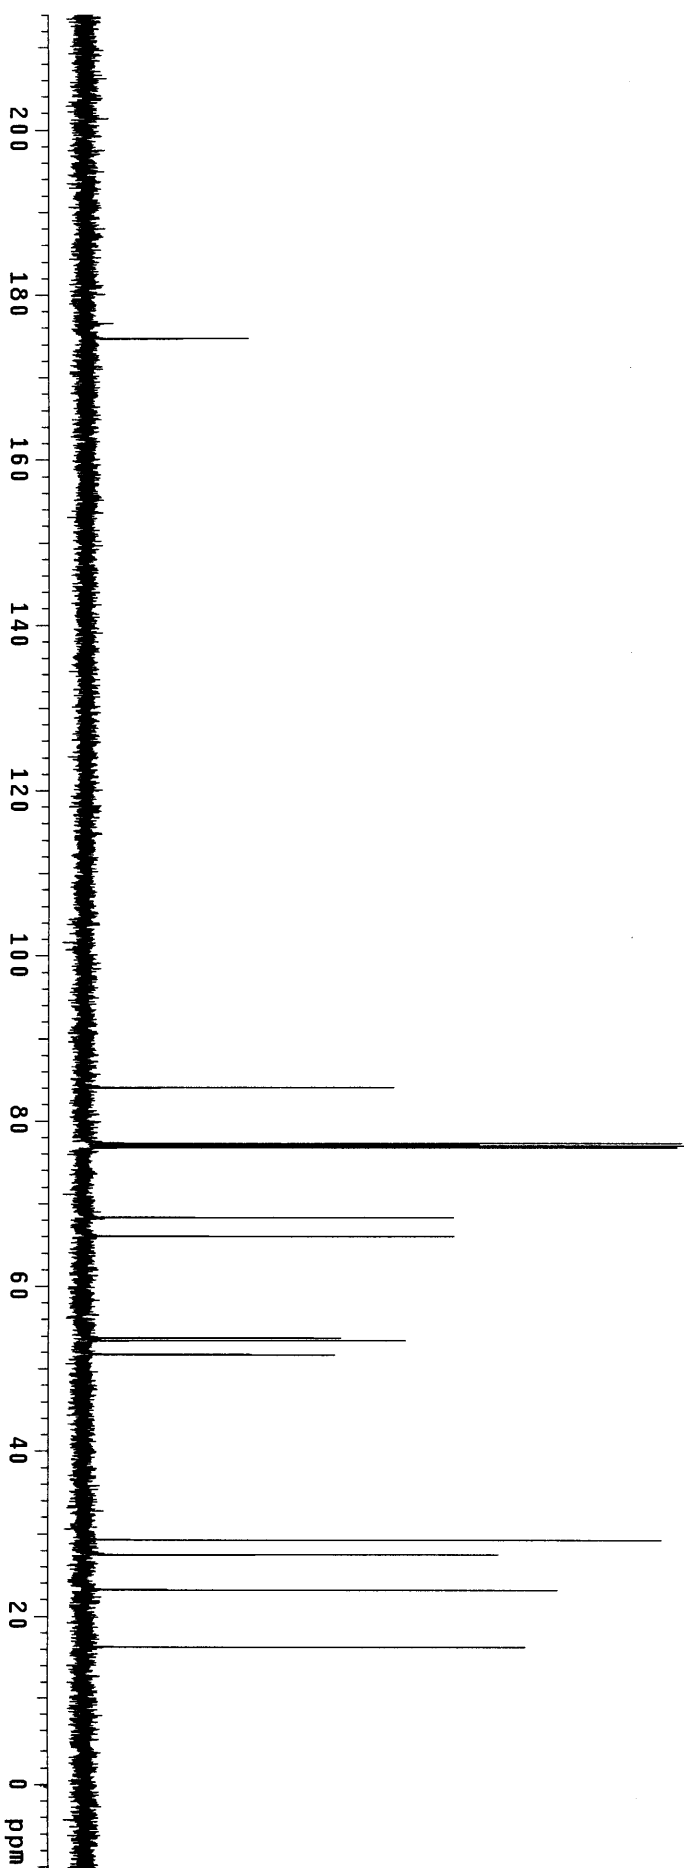

1lcui-3-9-1H

Data Collected on:  
nmr500-inova500  
Archive directory:  
/export/home/vnmr1/vnmrsys/data  
Sample directory:

File: H1

Pulse Sequence: szpu1  
Solvent: cdcl3

Operator: lcui

Relax. delay 2.000 sec  
Pulse 56.8 degrees  
Acq. time 2.668 sec  
Width 5397.0 Hz  
16 repetitions  
OBSERVE H1, 499.8563607 MHz  
DATA PROCESSING  
Resol. enhancement -0.0 Hz  
F1 size 32768  
Total time 0 min

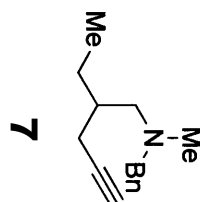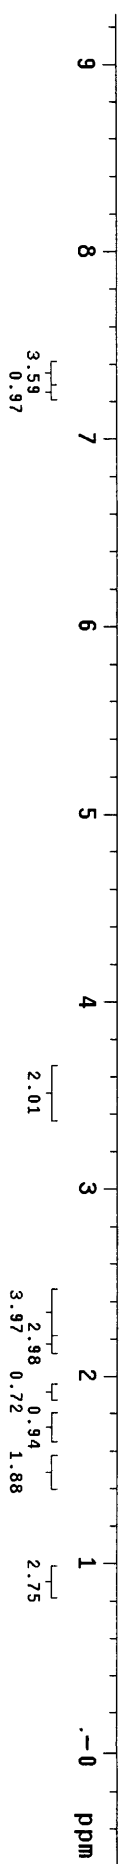

1icuj-3-9-1-13C

Data Collected on:  
nmr500-inova500  
Archive directory:  
/export/home/vnmr1/vnmrSYS/data  
Sample directory:

File: CARBON

Pulse Sequence: s2pu1  
Solvent: cdcl3  
Temp. 25.0 C / 298.1 K  
Operator: 1icuj

Relax. delay 3.000 sec  
Pulse 58.7 degrees  
Acq. time 1.500 sec  
Width 28258.6 Hz  
20 repetitions  
OBSERVE C13, 125.688901 MHz  
DECUPLE H1, 499.8588575 MHz  
Power 36 dB  
on during acquisition  
off during delay  
WALTZ-16 modulated  
DATA PROCESSING  
Line broadening 1.0 Hz  
FT size 131072  
Total time 0 min

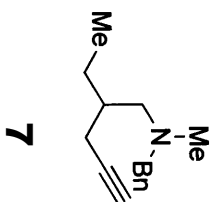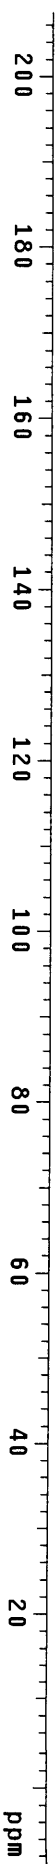

1tcu1-11-2-1H

Data Collected on:  
nmr500-inova500  
Archive directory:  
/export/home/vnmr1/vnmr500/data  
Sample directory:

File: H1

Pulse Sequence: szpu1

Solvent: cdcl3

Operator: tcu1

Relax. delay 2.000 sec

Pulse 56.8 degrees

Acq. time 2.668 sec

Width 5997.0 Hz

20 Repetitions

OBSERVE H1; 499.8563607 MHz

DATA PROCESSING

Resol. enhancement -0.0 Hz

FT size 32768

Total time 0 min

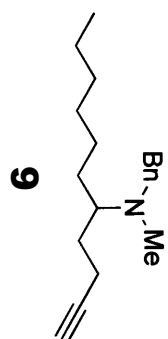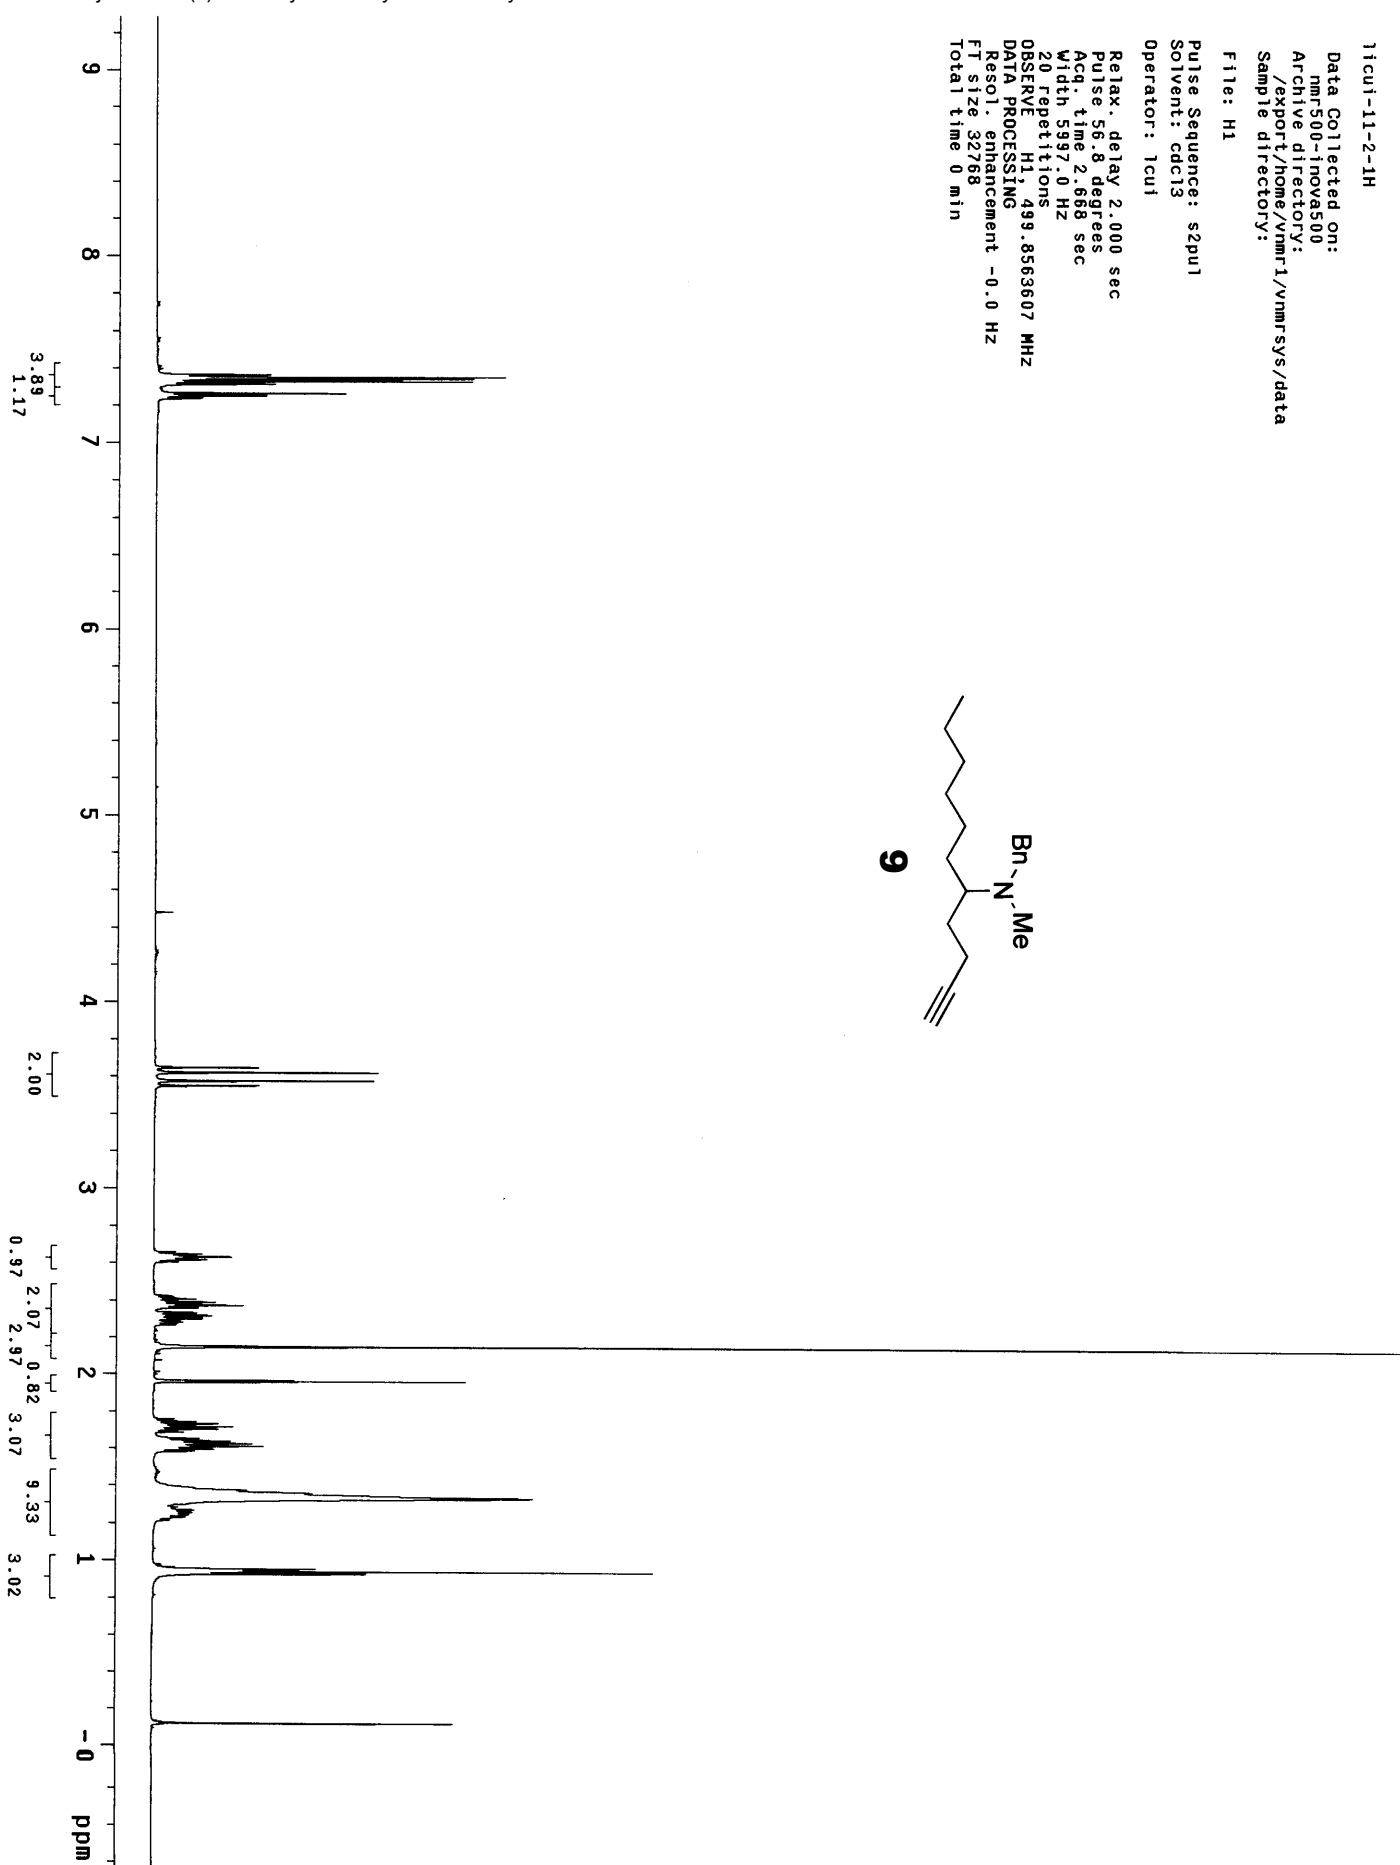

11ucj-106-1-13C

Data Collected on:  
nmr500-inova500  
Archive directory:  
/export/home/vnmr1/vnmr-sys/data  
Sample directory:

File: CARBON

Pulse Sequence: s2pu1  
Solvent: cdc13  
Temp. 25.0 C / 298.1 K  
Operator: lcu1

Relax. delay 3.000 sec  
Pulse 58.7 degrees  
Acq. time 1.300 sec  
Width 28258.6 Hz  
24 repetitions  
OBSERVE C13, 125.688918 MHz  
DECUPLE H1, 499.8588575 MHz  
Power 36 db  
on during acquisition  
off during delay  
WALTZ-16 modulated  
DATA PROCESSING  
Line broadening 1.0 Hz  
F1 size 131072  
Total time 0 min

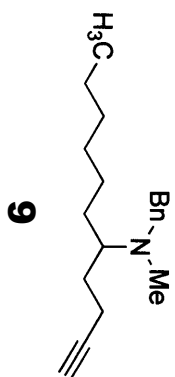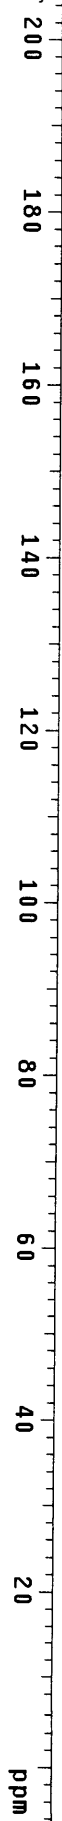

Z\*SPEC IDG400-SFE  
UCSB

Pulse Sequence: szpu1  
Solvent: cdcl3  
Ambient temperature  
User: 1-12-87  
INOVA-400 "nmr-400"

Relax. delay 3.000 sec  
Pulse 48.5 degrees  
Acq. time 2.000 sec  
Width 5132.5 Hz  
20 repetitions  
OBSERVE H1, 399.9486712 MHz  
DATA PROCESSING  
Line broadening 0.1 Hz  
FT size 65536  
Total time 10 min, 41 sec

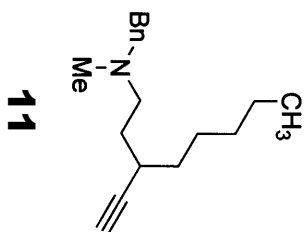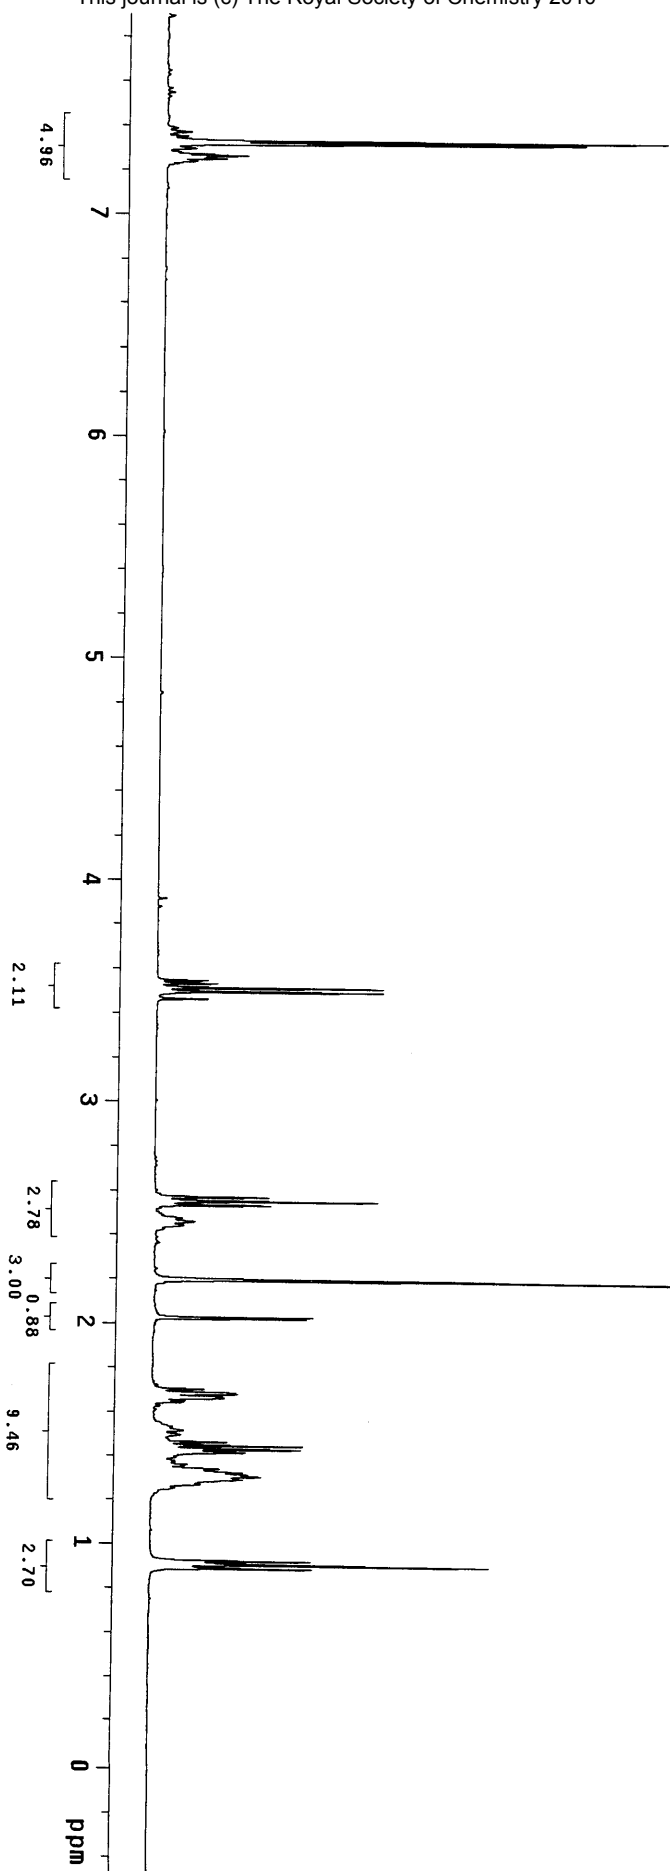

1luc1-106-1-13C

Data Collected on:  
nmr500-inova500  
Archive directory:  
/export/home/vnmr1/vnmrsys/data  
Sample directory:

File: CARBON

Pulse Sequence: szpu1  
Solvent: cdcl3  
Temp. 24.8 C / 297.9 K  
Operator: lcu1  
Relax. delay 3.000 sec  
Pulse 58.7 degrees  
Acq. time 1.300 sec  
Width 28258.6 Hz  
76 repetitions  
OBSERVE C13, 125.6889858 MHz  
DECUPLE H1, 499.8588575 MHz  
Power 36 dB  
on during acquisition  
off during delay  
WALTZ-16 modulated  
DATA PROCESSING  
Line broadening 1.0 Hz  
FT size 131072  
Total time 0 min

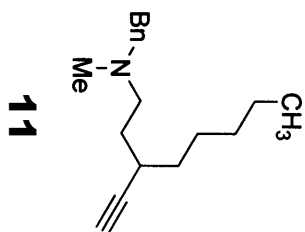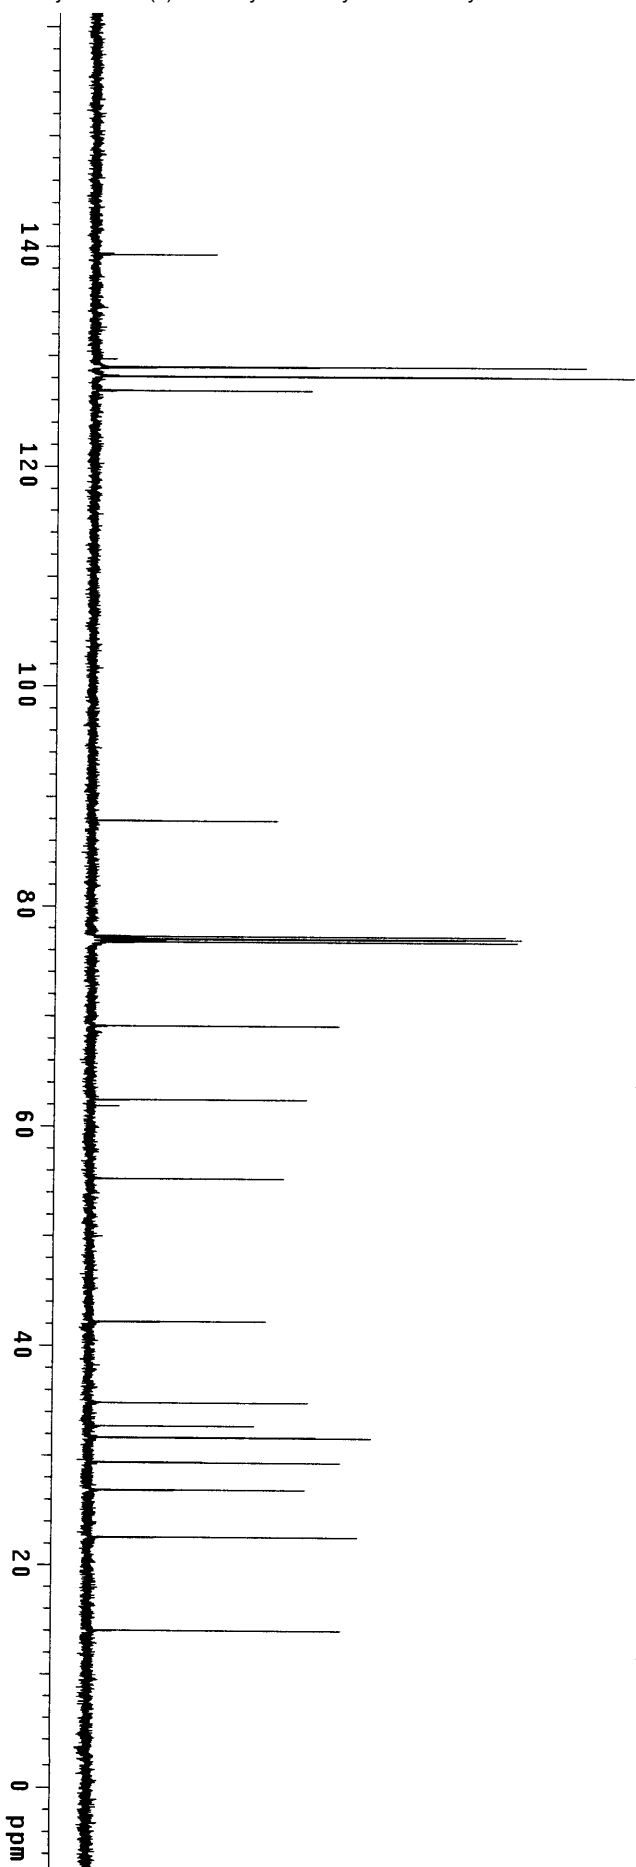

Automation directory: /home/walkup/vnmrSYS/data/auto\_2009.06.01\_01  
File : exp  
Sample id : tmpstudy

Pulse Sequence: szpu1

Solvent: cdcl3

Temp. 25.0 C / 298.1 K

Operator: walkup

VNMR-500 "nmr-500"

Relax. delay 1.000 sec

Pulse 45.0 degrees

Acq. time 2.049 sec

Width 8012.8 Hz

40 repetitions

OBSERVE H1, 499.7939134 MHz

DATA PROCESSING

Line broadening 0.2 Hz

FT size 65536

Total time 6 min, 37 sec

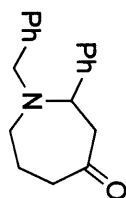

**6a**

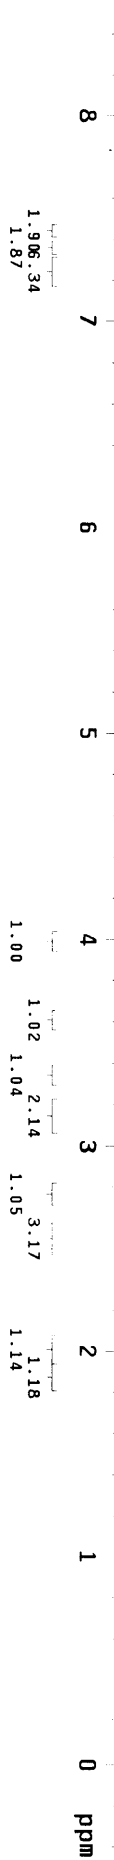

1jcu1-66-1-1H

Automation directory: /home/walkup/vnmr5ys/data/auto\_2009.05.21

File : exp  
Sample id : tmpstudy

Pulse Sequence: s2pu1

Solvent: cdcl3  
Temp: 25.0 C / 298.1 K  
Operator: walkup  
VNMRS-500 "nmr500"

Relax. delay 1.000 sec  
Pulse 45.0 degrees  
Acq. time 1.300 sec  
Width 30487.8 Hz  
5896 repetitions  
OBSERVE C13, 125.6732813 MHz  
DECUPLE H1, 499.7964114 MHz  
Power 39 dB  
continuously on  
WALTZ-16 modulated  
DATA PROCESSING  
Line broadening 0.5 Hz  
Ft size 131072  
Total time 12 hr, 49 min, 47 sec

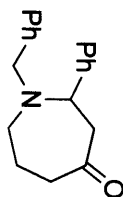

**6a**

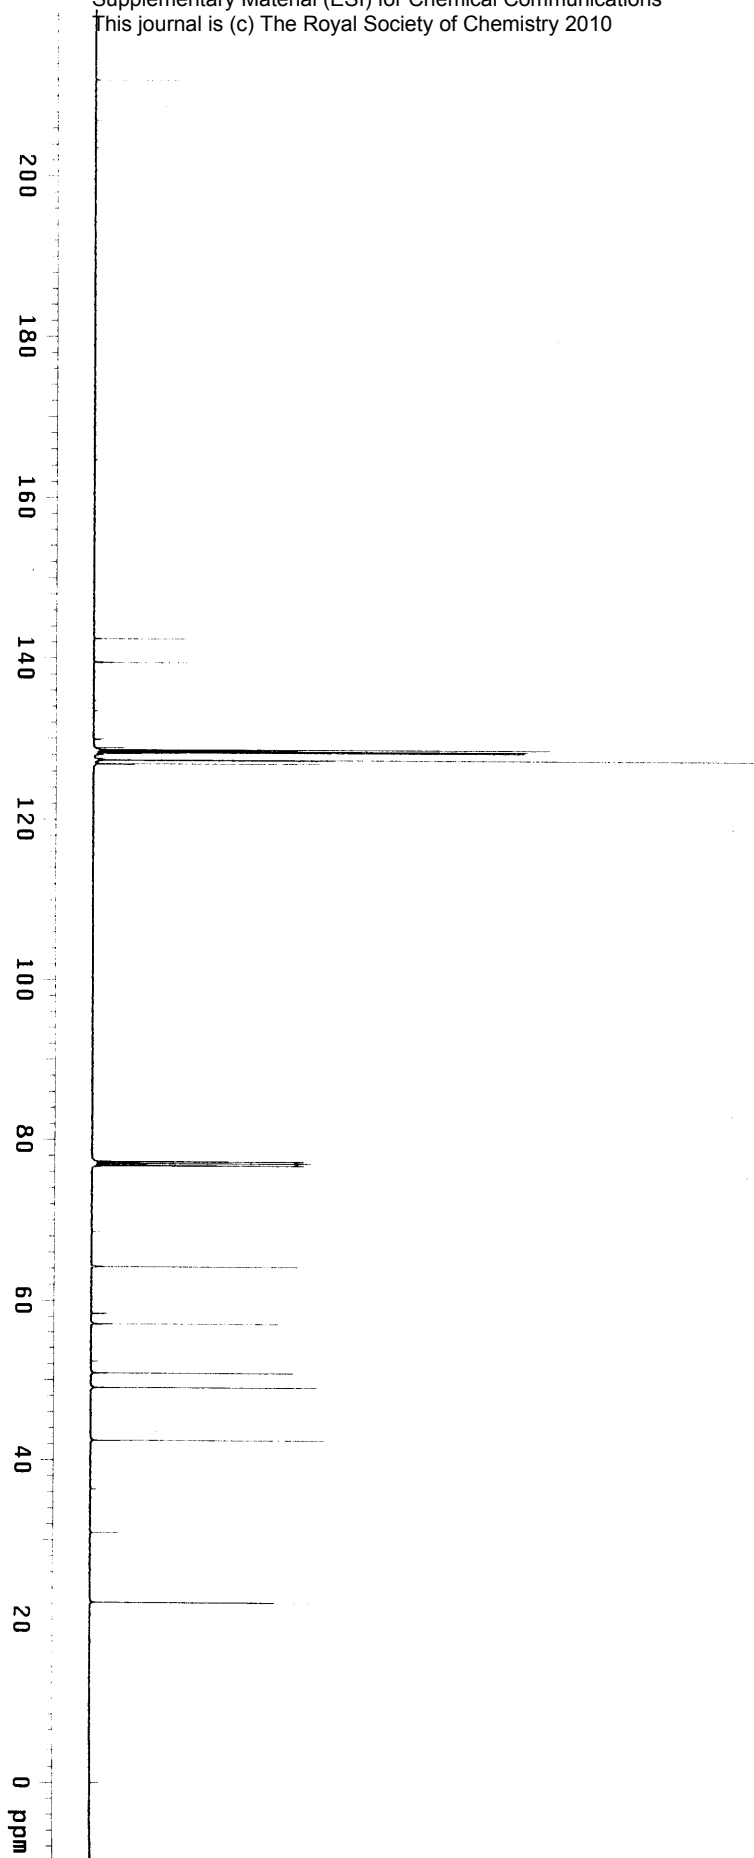

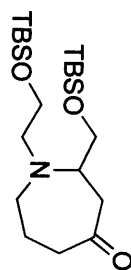

**6b**

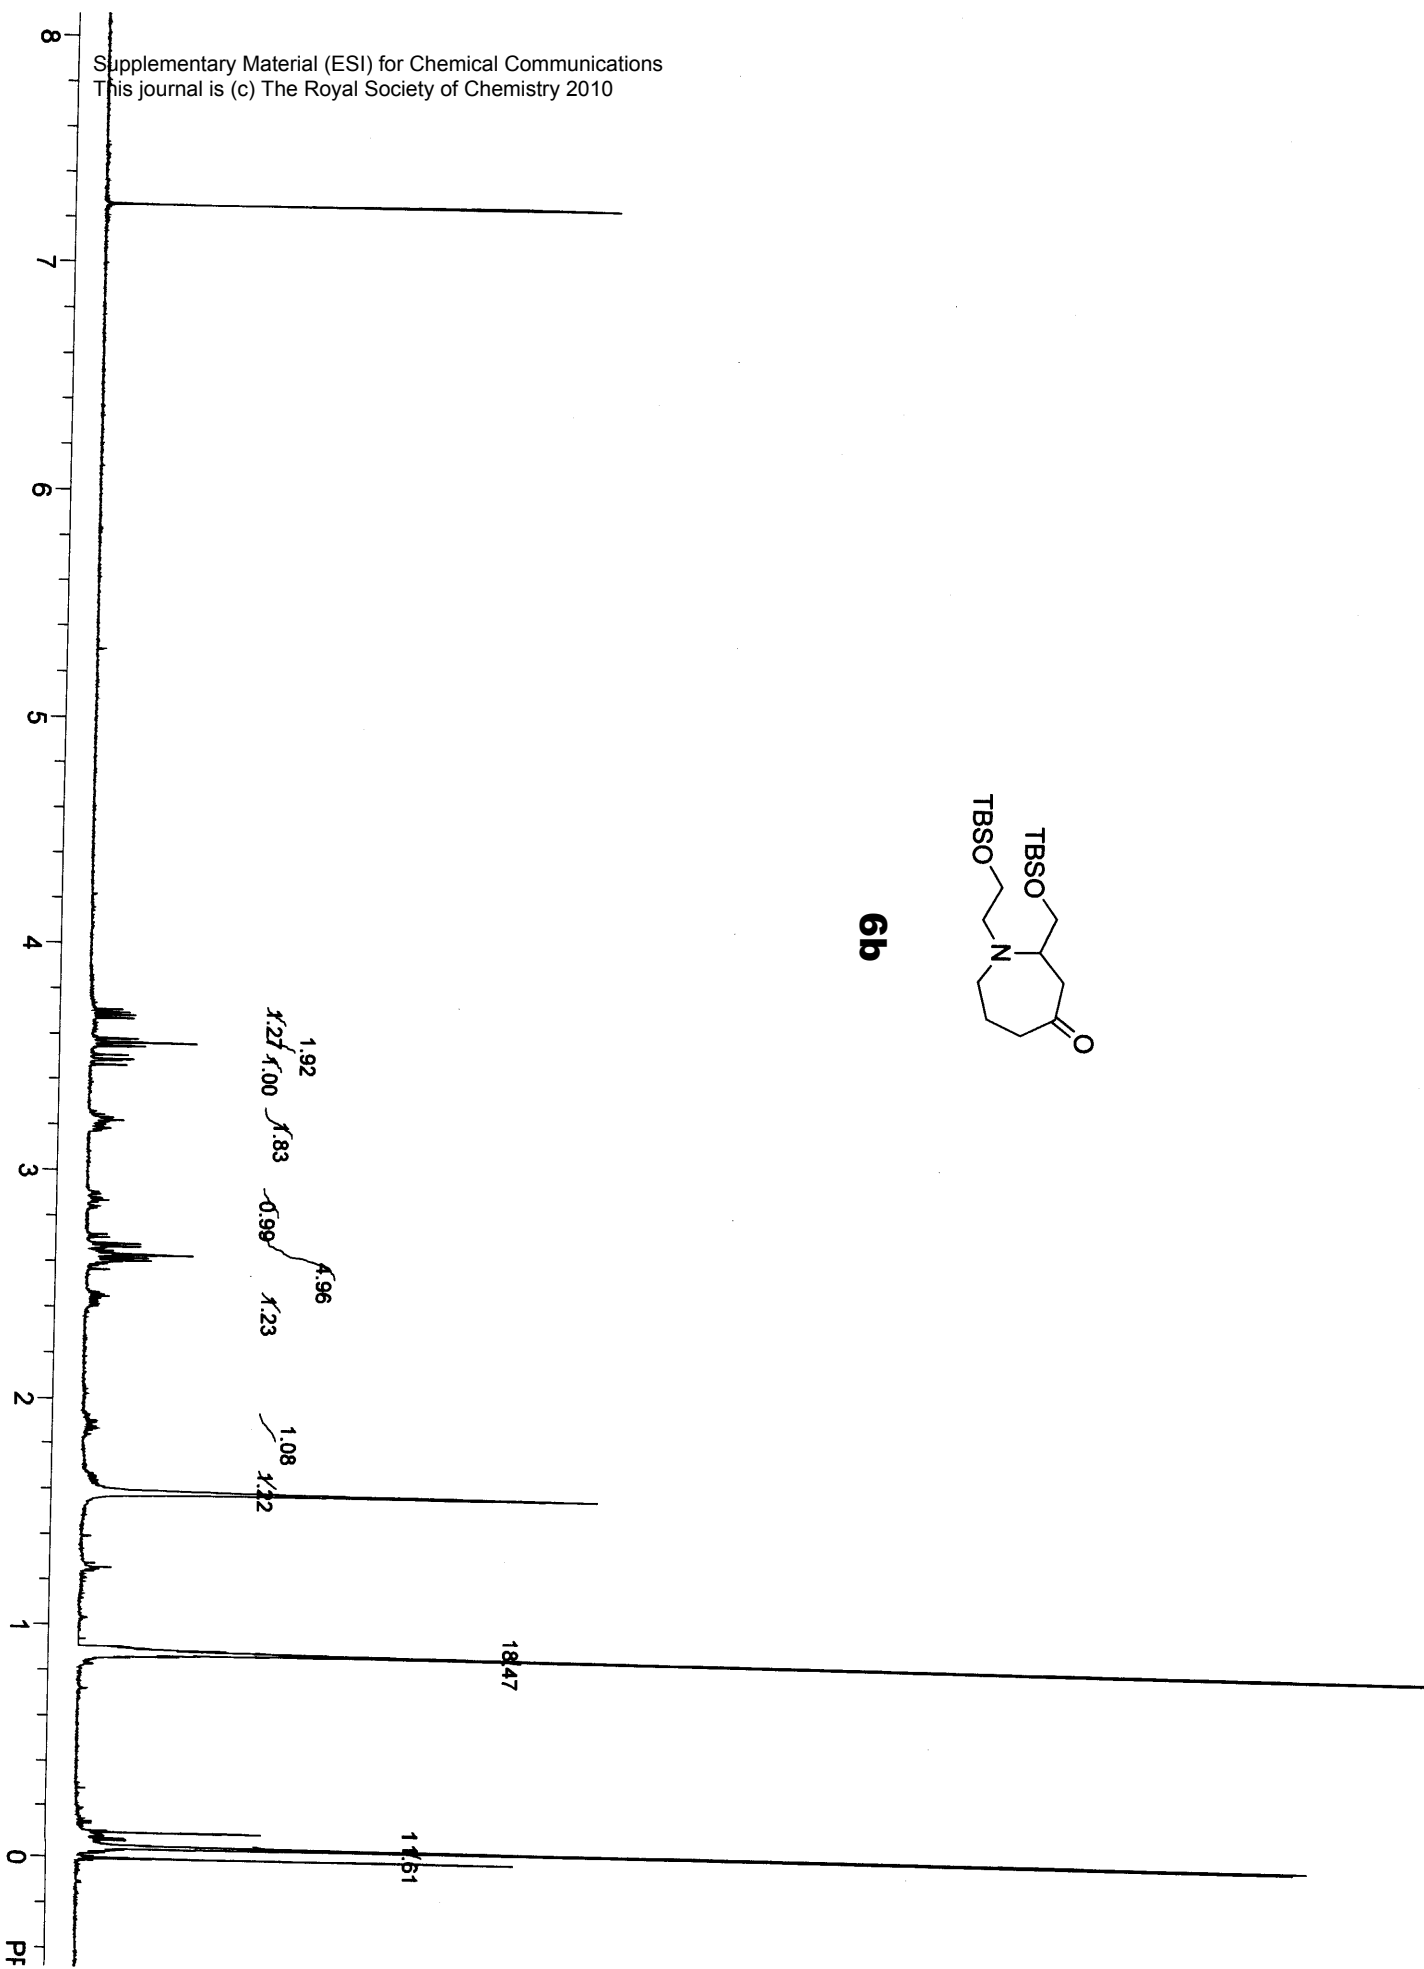

STANDARD CARBON PARAMETERS

Data Collected on:  
nmr500-inova500  
Archive directory:  
/export/home/vnmr1/vnmr/sys/data  
Sample directory:

File: CARBON

Pulse Sequence: s2pul  
Solvent: cdcl3

Temp. 22.0 C / 295.1 K  
Operator: lye

Relax. delay 3.000 sec  
Pulse 58.7 degrees  
Acq. time 1.300 sec  
Width 40000.0 Hz  
1680 repetitions

OBSERVE C13, 125.6889829 MHz  
DECUPLE H1, 499.8588575 MHz  
Power 36 dB

on during acquisition  
off during delay  
WALTZ-16 modulated  
DATA PROCESSING  
Line broadening 0.5 Hz  
FI size 131072  
Total time 0 min

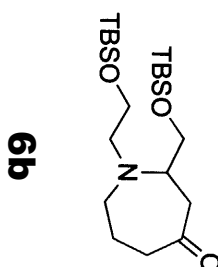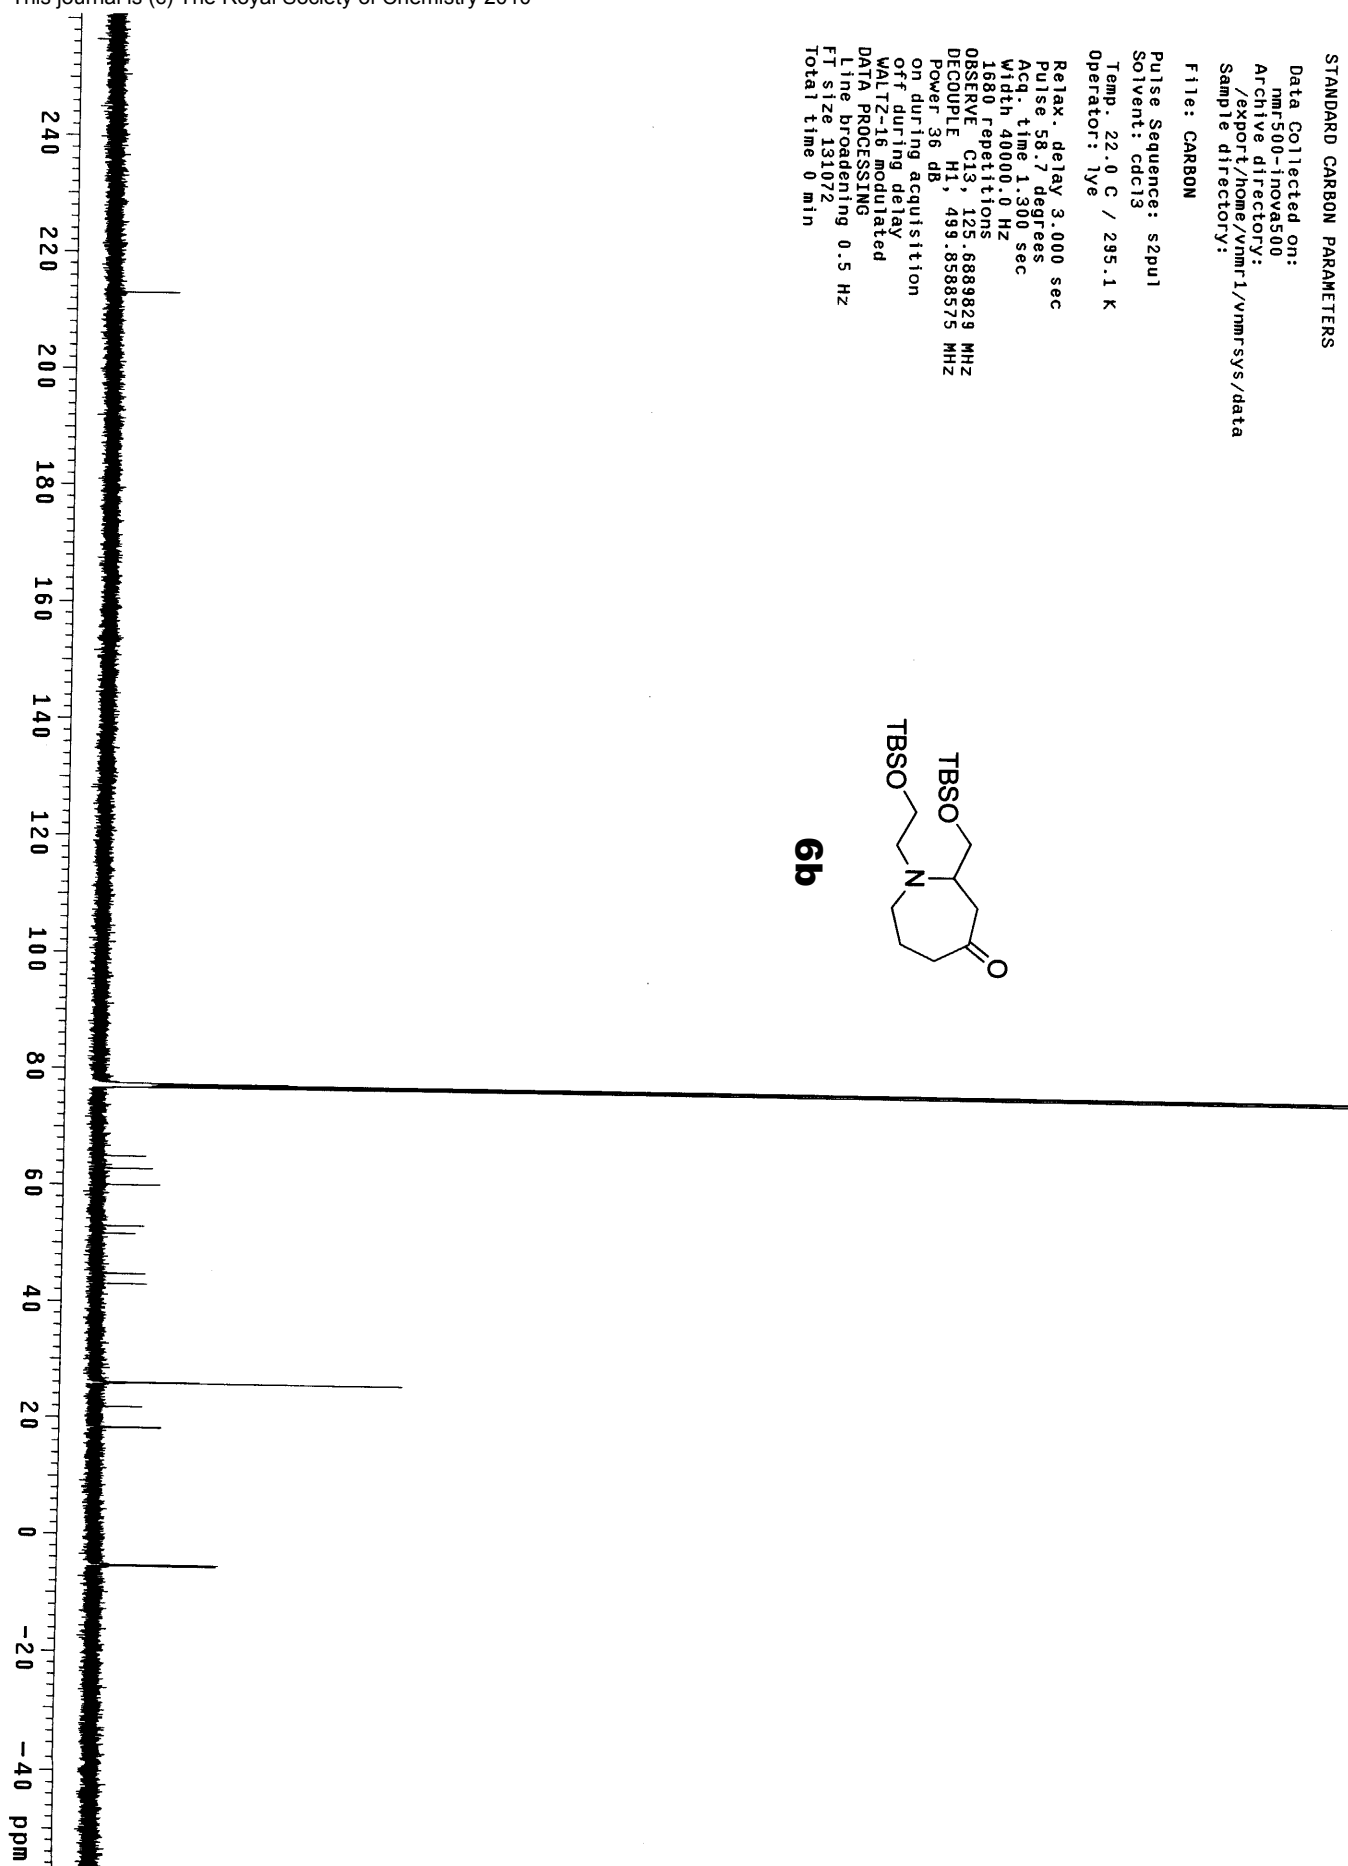

11cu1-53-1-F1

Archive directory:  
Sample directory:

Pulse Sequence: szpu1  
Solvent: cdcl3  
Temp. 25.0 C / 298.1 K  
File: 11cu1-53-1-F1  
INOVA-500 "nmrserver"

Relax. delay 1.000 sec  
Pulse 45.0 degrees  
Acq. time 2.049 sec  
Width 6410.3 Hz  
28 repetitions  
OBSERVE H1, 400.056537 MHz  
DATA PROCESSING  
Resol. enhancement -0.0 Hz  
F1 size 65536  
Total time 6 min, 31 sec

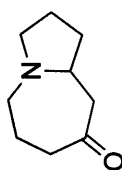

**6c**

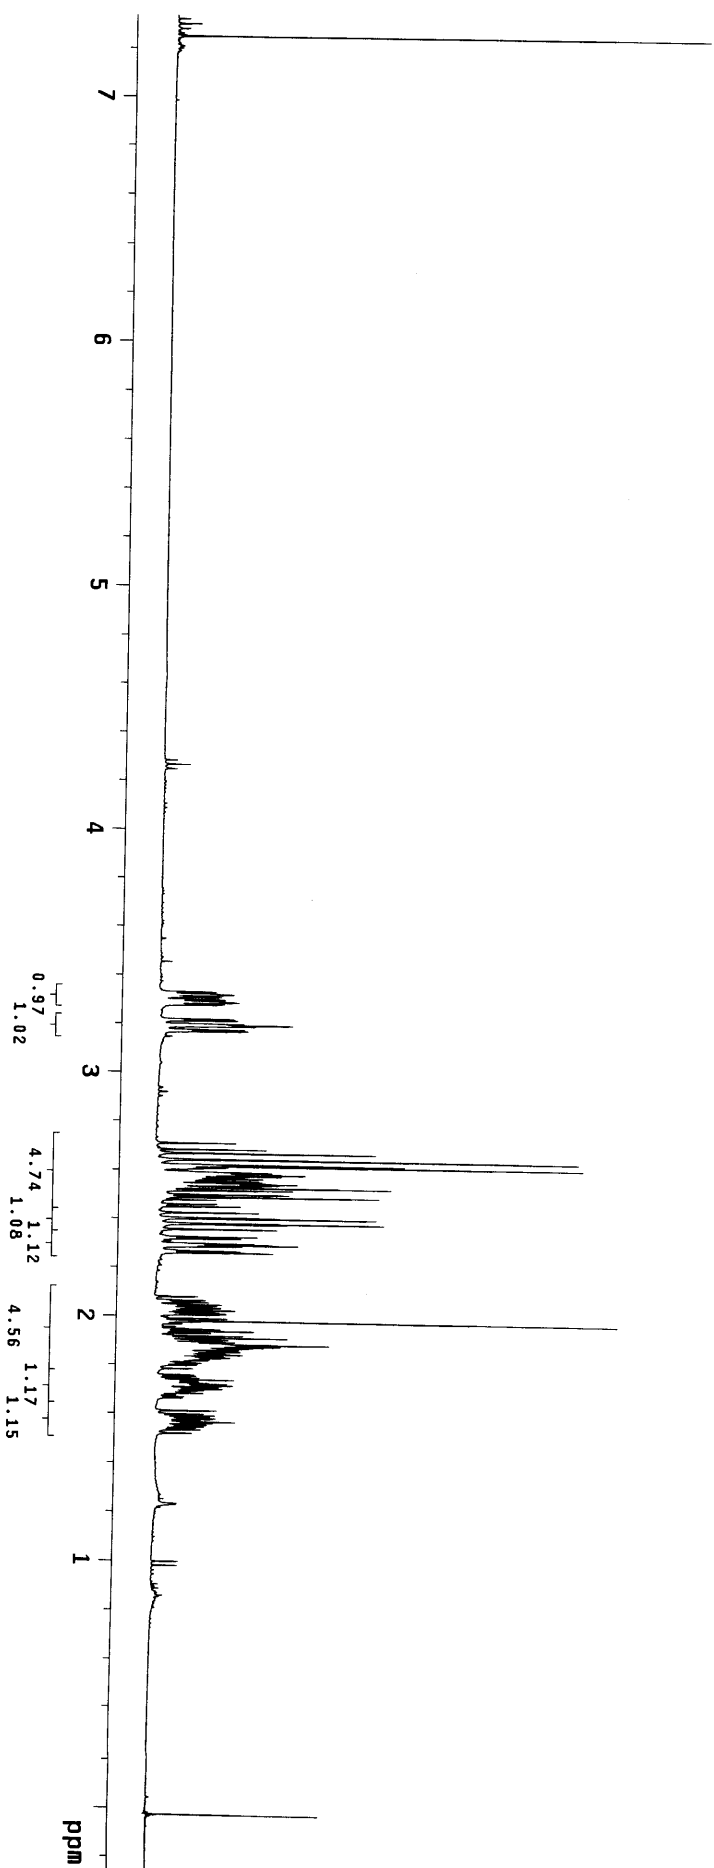

Archive directory:  
Sample directory:

Pulse Sequence: szpu1  
Solvent: cdcl3  
Temp: 25.0 C / 298.1 K  
User: 1-14-87  
File: 11cut-53-1-F1-13Ca  
INOVA-500 "nmrserver"

Relax. delay 1.000 sec  
Pulse 45.0 degrees  
Acq. time 1.300 sec  
Width 30487.8 Hz  
17364 repetitions  
OBSERVE C13, 125.6732809 MHz  
DECOUPLE H1, 499.7964114 MHz  
Power 39 dB  
continuously on  
WALTZ-16 modulated  
DATA PROCESSING  
Line broadening 0.5 Hz  
Ft size 131072  
Total time 12 hr, 49 min, 47 sec

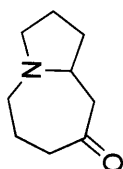

**6c**

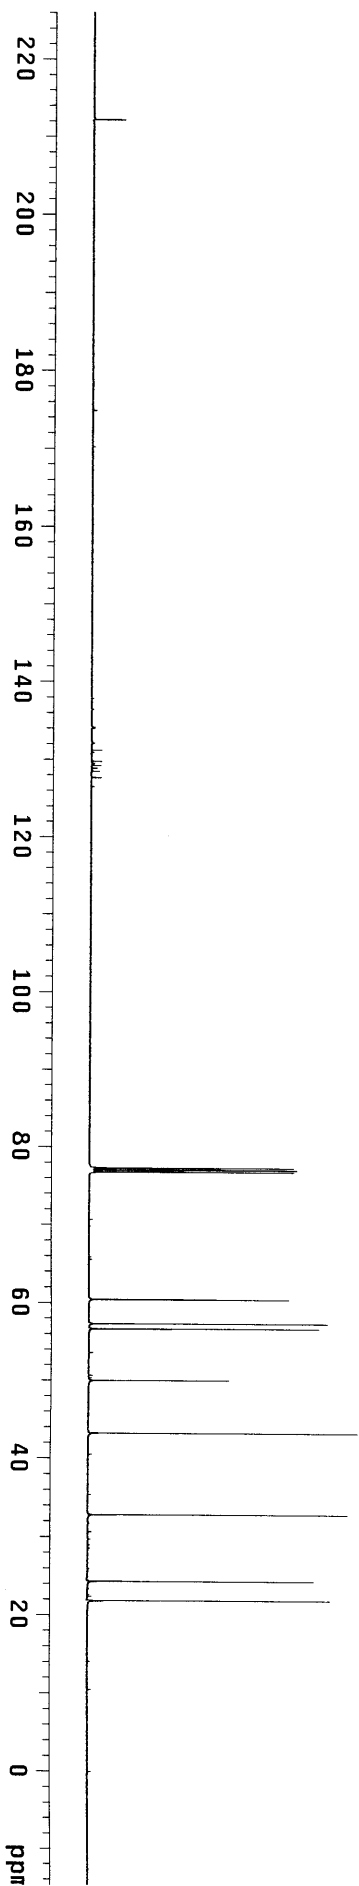

**6d**

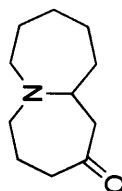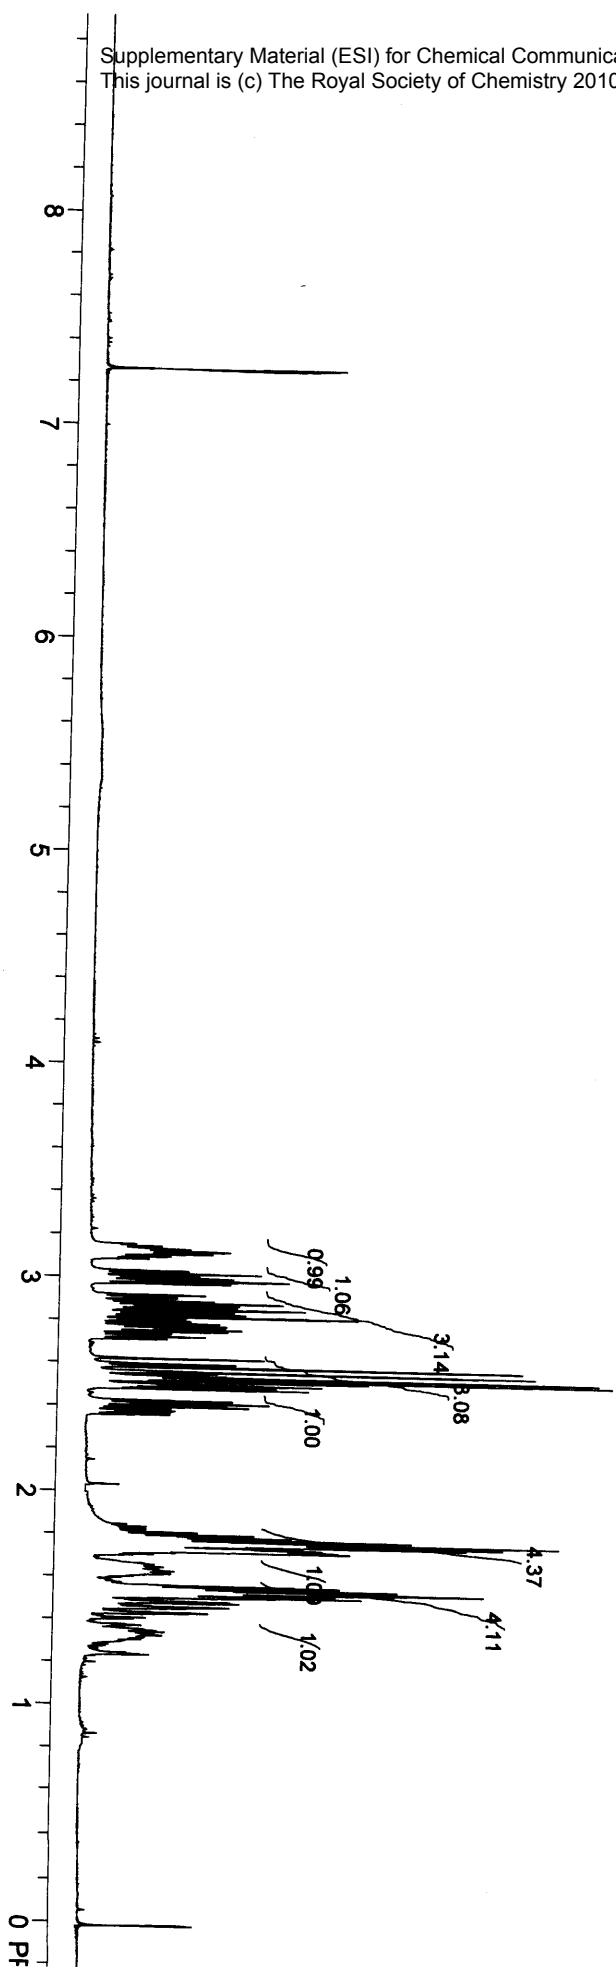

# STANDARD CARBON PARAMETERS

Data Collected on:  
nmr500-inoxa500  
Archive directory:  
/export/home/vnmr1/vnmrSYS/data  
Sample directory:

File: CARBON

Pulse Sequence: s2pu1  
Solvent: cdcl3

Temp. 22.0 C / 295.1 K  
Operator: iye

Relax. delay 3.000 sec  
Pulse 58.7 degrees

Acq. time 1.300 sec  
Width 40000.0 Hz

72 repetitions

OBSERVE C13, 125.6889890 MHz  
DECOUPLE H1, 499.8588575 MHz

Power 36 db  
on during acquisition

off during delay  
WALTZ-16 modulated

DATA PROCESSING  
Line broadening 0.5 Hz  
Ft size 131072  
Total time 0 min

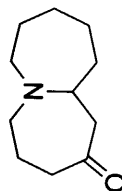

**6d**

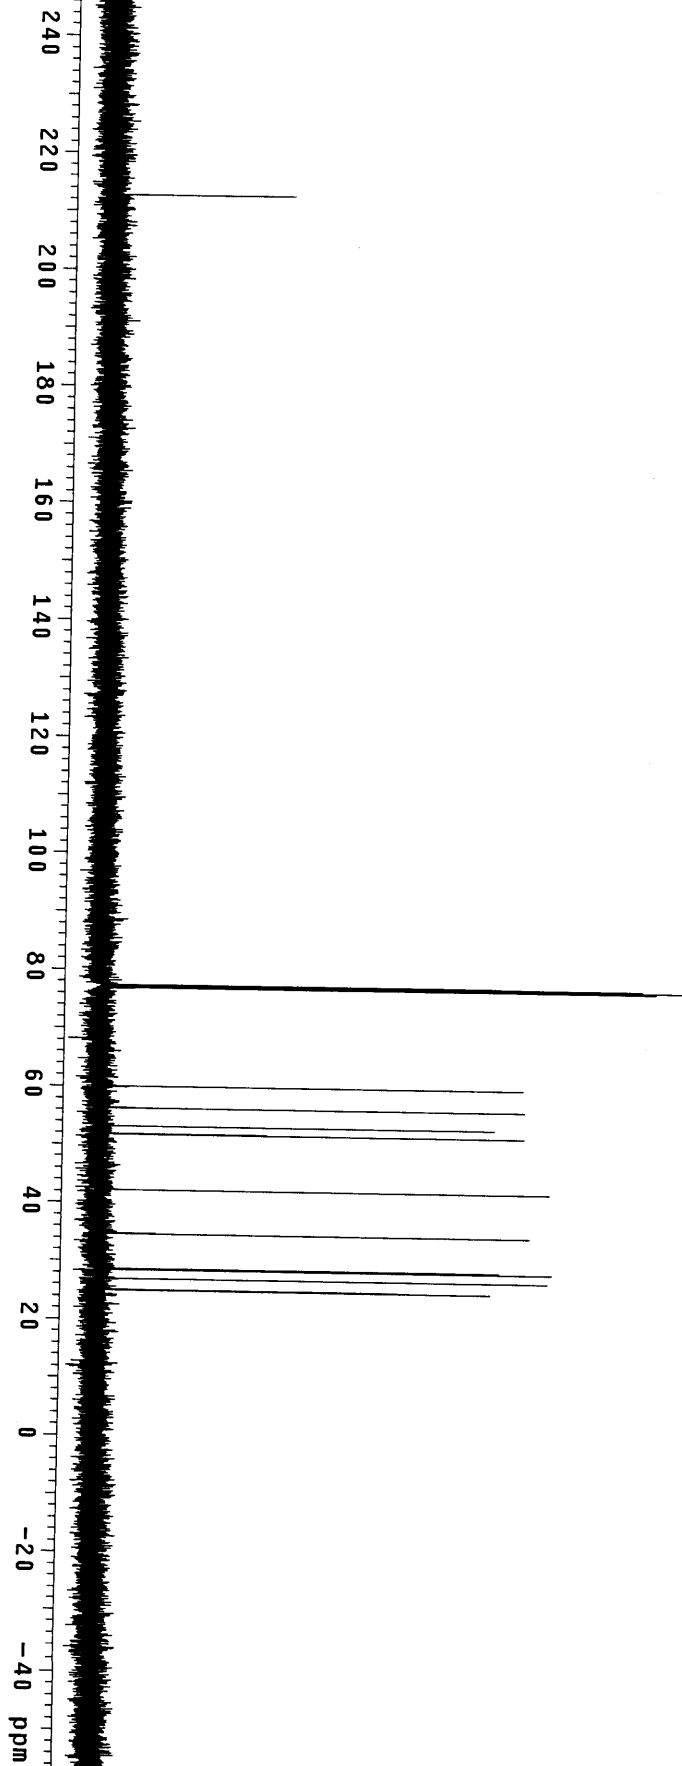

11cui-106-1-1H  
Pulse Sequence: s2pu1  
Solvent: cdcl3  
Ambient temperature  
User: 1-12-87  
INOVA-400 "nmr-400"  
Relax. delay 3.000 sec  
Pulse 48.5 degrees  
Acq. time 2.000 sec  
Width 5132.5 Hz  
24 repetitions  
OBSERVE H1, 399.9486713 MHz  
DATA PROCESSING  
Line broadening 0.1 Hz  
FI size 65536  
Total time 10 min, 41 sec

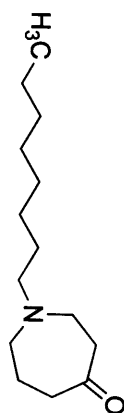

**6e**

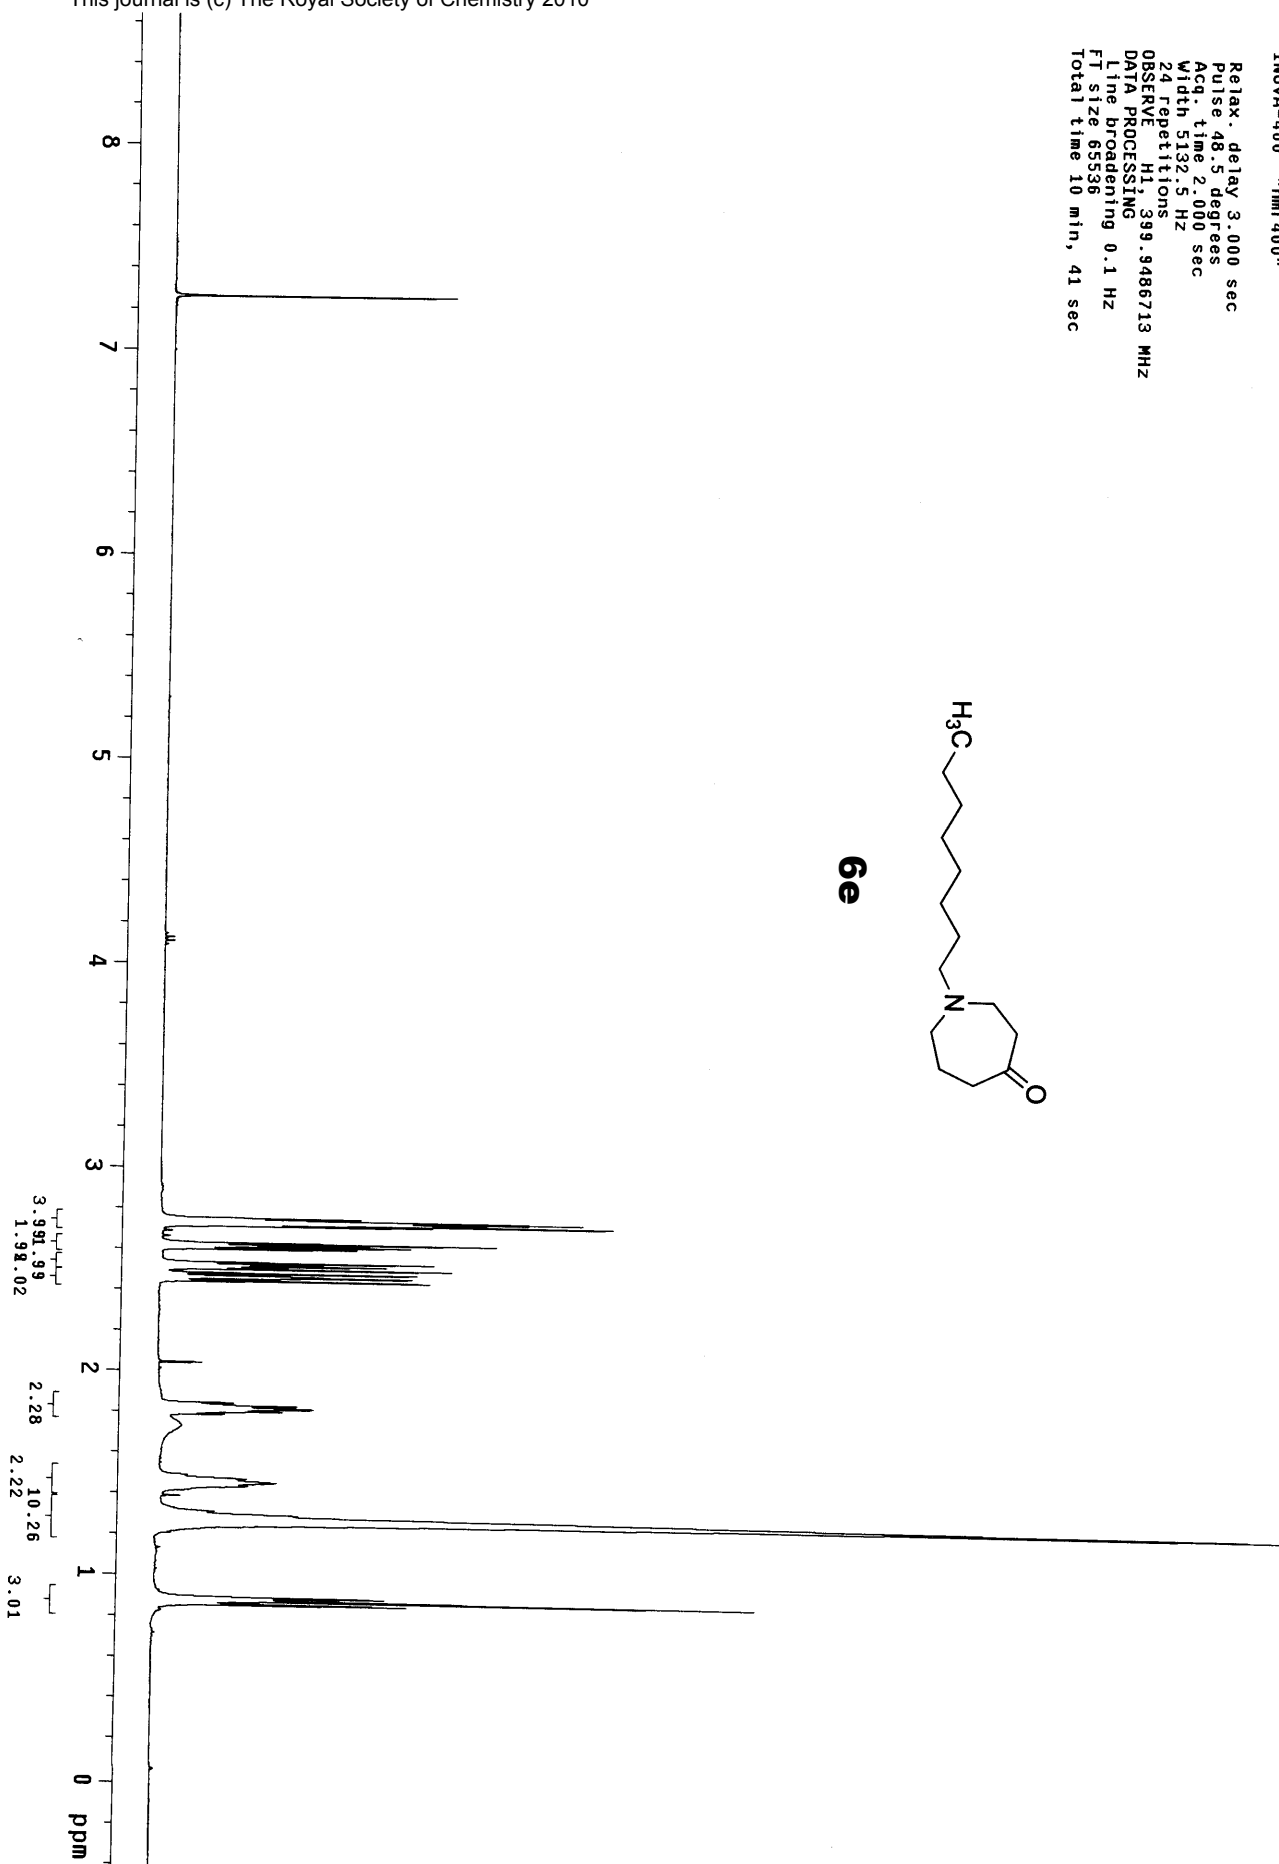

11cu1-103-1-13C

Data Collected on:  
nmr500-inoxa500  
Archive directory:  
/export/home/vnmr1/vnmr500/data  
Sample directory:

File: CARBON

Pulse Sequence: s2pul  
Solvent: cdc13  
Temp. 22.0 C / 295.1 K  
Operator: 1cu1

Relax. delay 3.000 sec  
Pulse 58.7 degrees  
Acq. time 1.300 sec  
Width 40000.0 Hz  
2150 repetitions  
OBSERVE C13, 125.6889854 MHz  
DECOUPLE H1, 499.858575 MHz  
Power 36 db  
on during acquisition  
off during delay  
WALTZ-16 modulated  
DATA PROCESSING  
Line broadening 0.5 Hz  
FT size 131072  
Total time 0 min

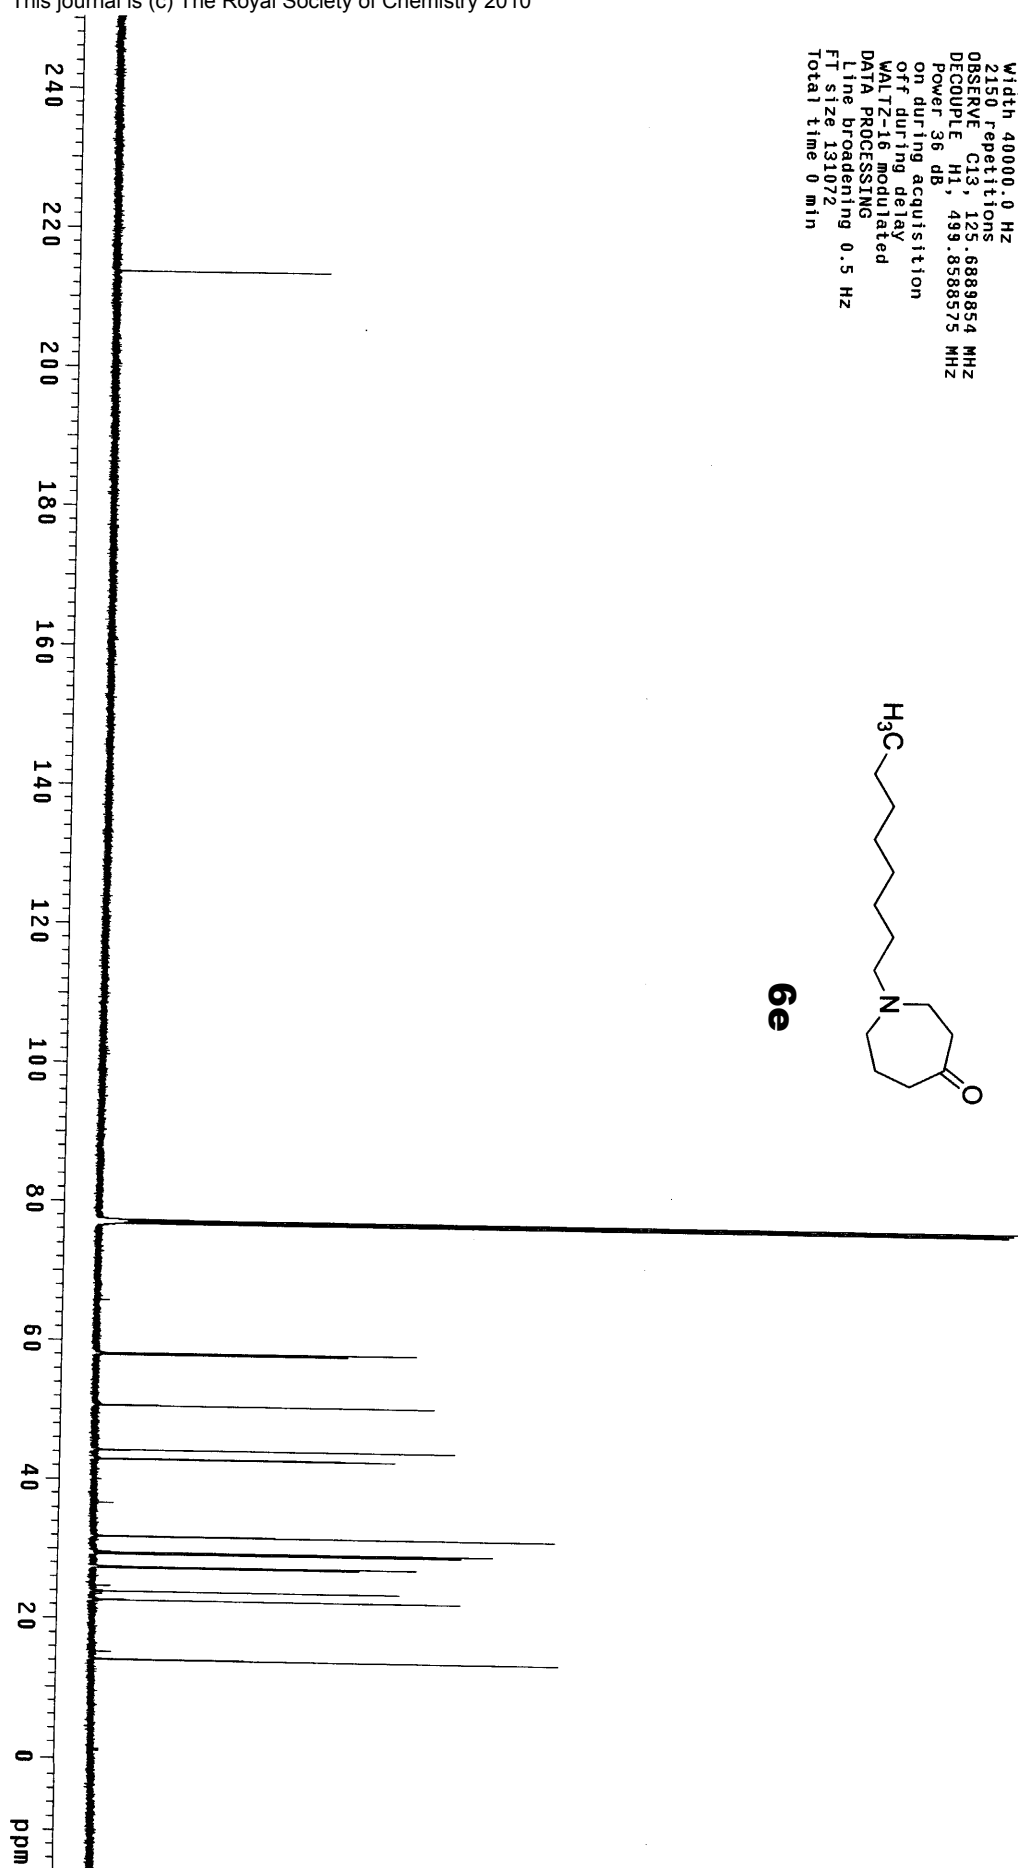

11cui-112-1-1H

Pulse Sequence: s2pu1

Solvent: cdcl3

Ambient temperature

User: 1-12-87

INOVA-400 "nmr400"

Relax. delay 3.000 sec

Pulse 48.5 degrees

Acq. time 2.000 sec

Width 5132.5 Hz

24 repetitions

OBSERVE H1, 399.9486712 MHz

DATA PROCESSING

Line broadening 0.1 Hz

FT size 65536

Total time 10 min, 41 sec

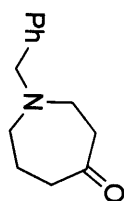

**6f**

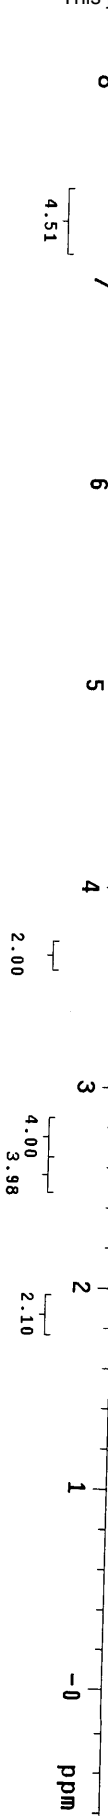

1tcut-109-1-13C

Data Collected on:  
nmr500-inova500  
Archive directory:  
/export/home/vmm1/vnmrSYS/data  
Sample directory:

File: CARBON

Pulse Sequence: s2pul1  
Solvent: cdcl3

Temp. 25.0 C / 298.1 K  
Operator: tcut

Relax. delay 3.000 sec  
Pulse 58.7 degrees

Acq. time 1.300 sec  
Width 28258.6 Hz

640 repetitions

OBSERVE C13, 125.688858 MHz

DECOUPLE H1, 499.8588575 MHz

Power 36 db

on during acquisition

off during delay

WALTZ-16 modulated

DATA PROCESSING

Line broadening 1.0 Hz

FT size 131072

Total time 0 min

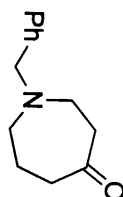

**6f**

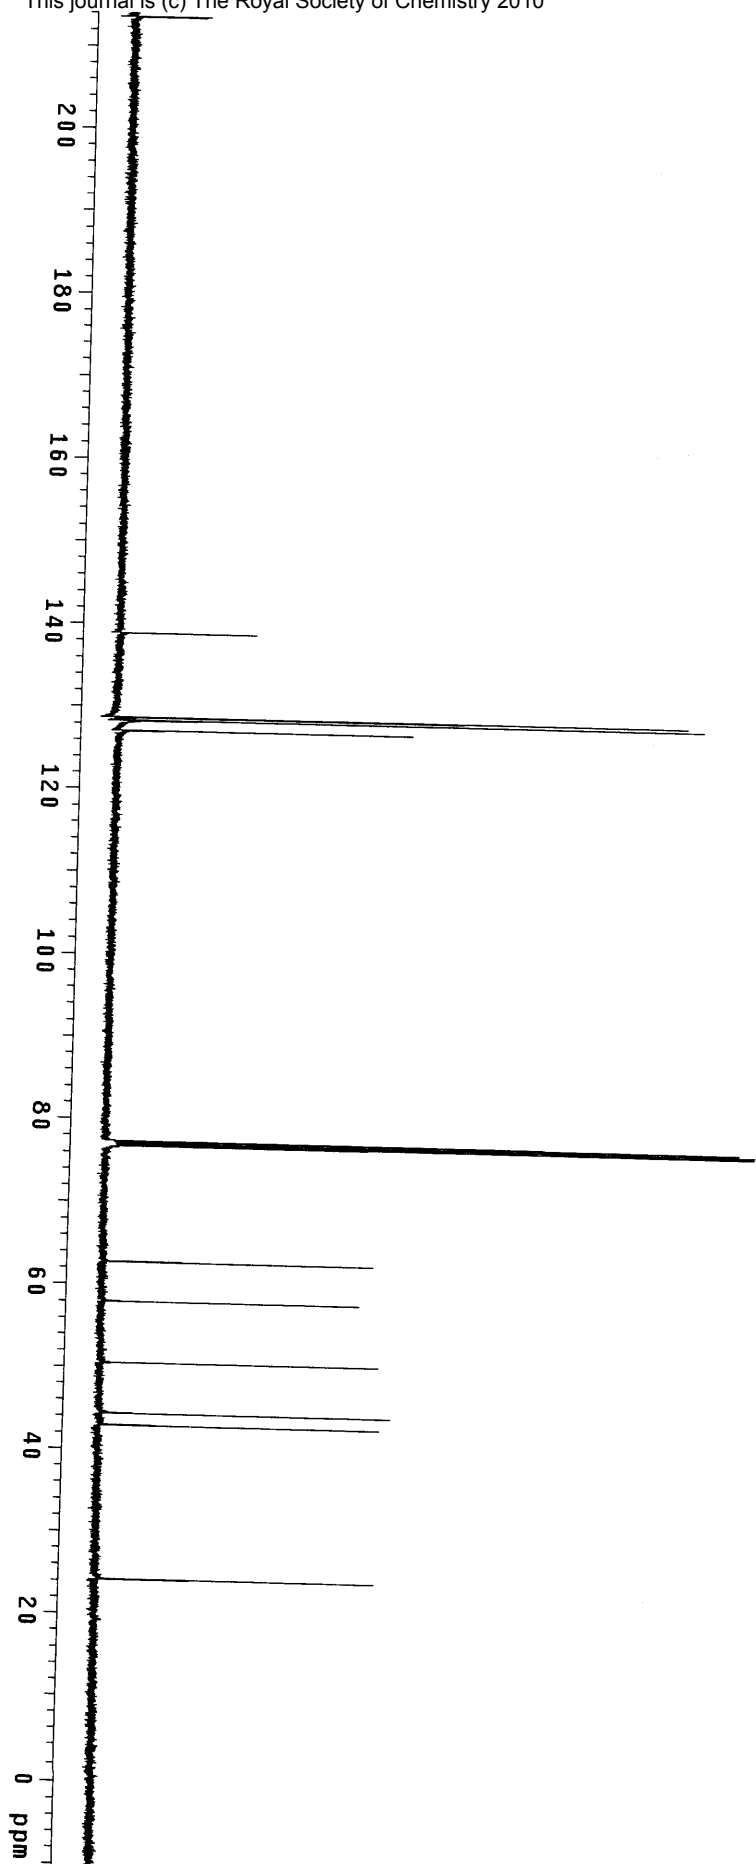

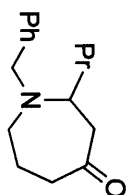

**6g**

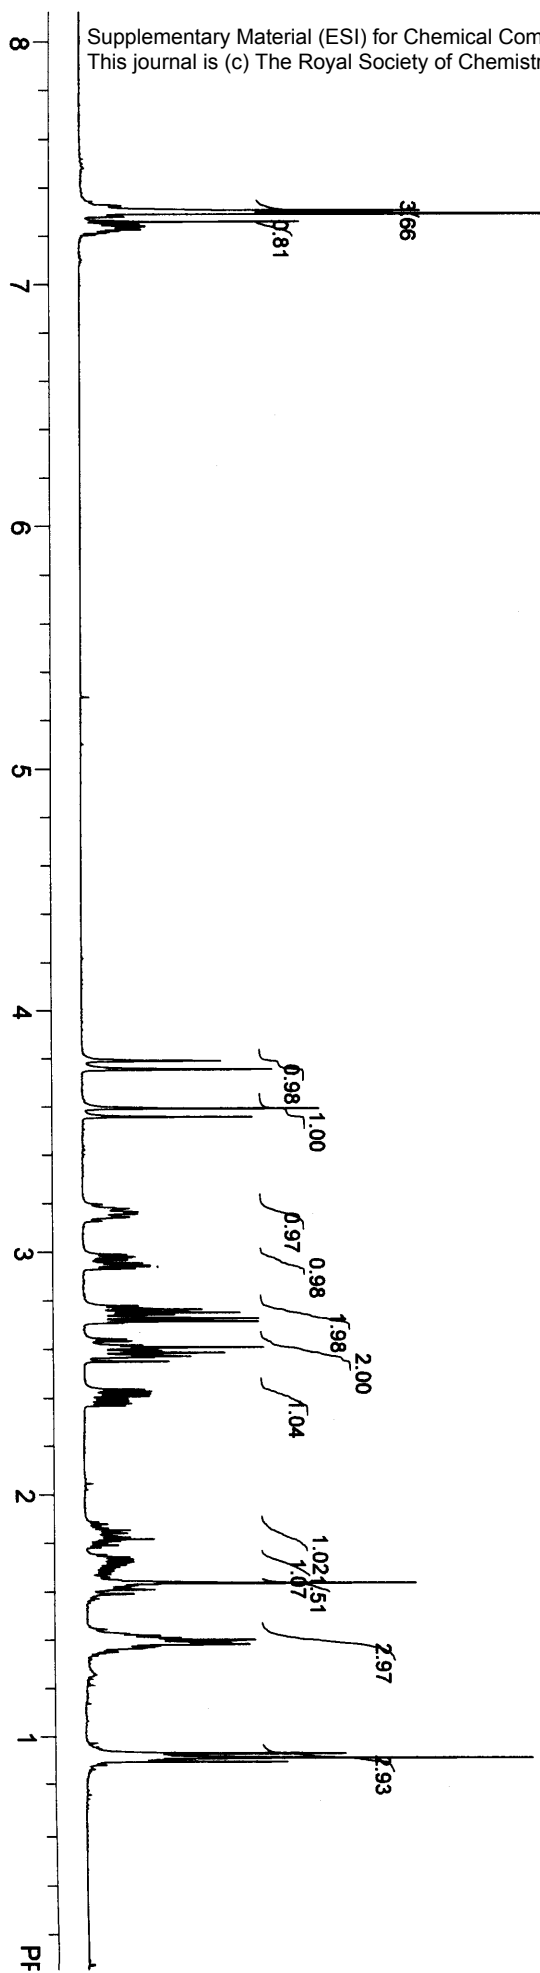

STANDARD CARBON PARAMETERS

Data Collected on:  
nmr500-inova500  
Archive directory:  
/export/home/vnmr1/vnmrsys/data  
Sample directory:

File: CARBON

Pulse Sequence: szpu1  
Solvent: cdcl3

Temp: 22.0 C / 295.1 K  
Operator: lye

Relax. delay 3.000 sec  
Pulse 58.7 degrees  
Acq. time 1.300 sec  
Width 40000.0 Hz  
216 repetitions  
OBSERVE C13, 125.6889841 MHz  
DECOUPLE H1, 499.8588575 MHz  
Power 36 dB  
on during acquisition  
off during delay  
WALTZ-16 modulated  
DATA PROCESSING  
Line broadening 0.5 Hz  
FT size 131072  
Total time 0 min

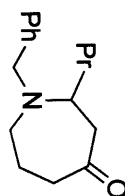

**6g**

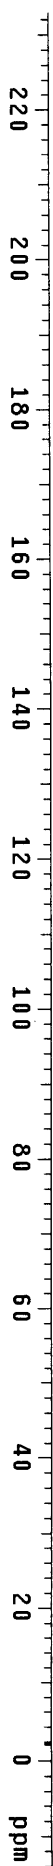

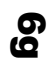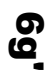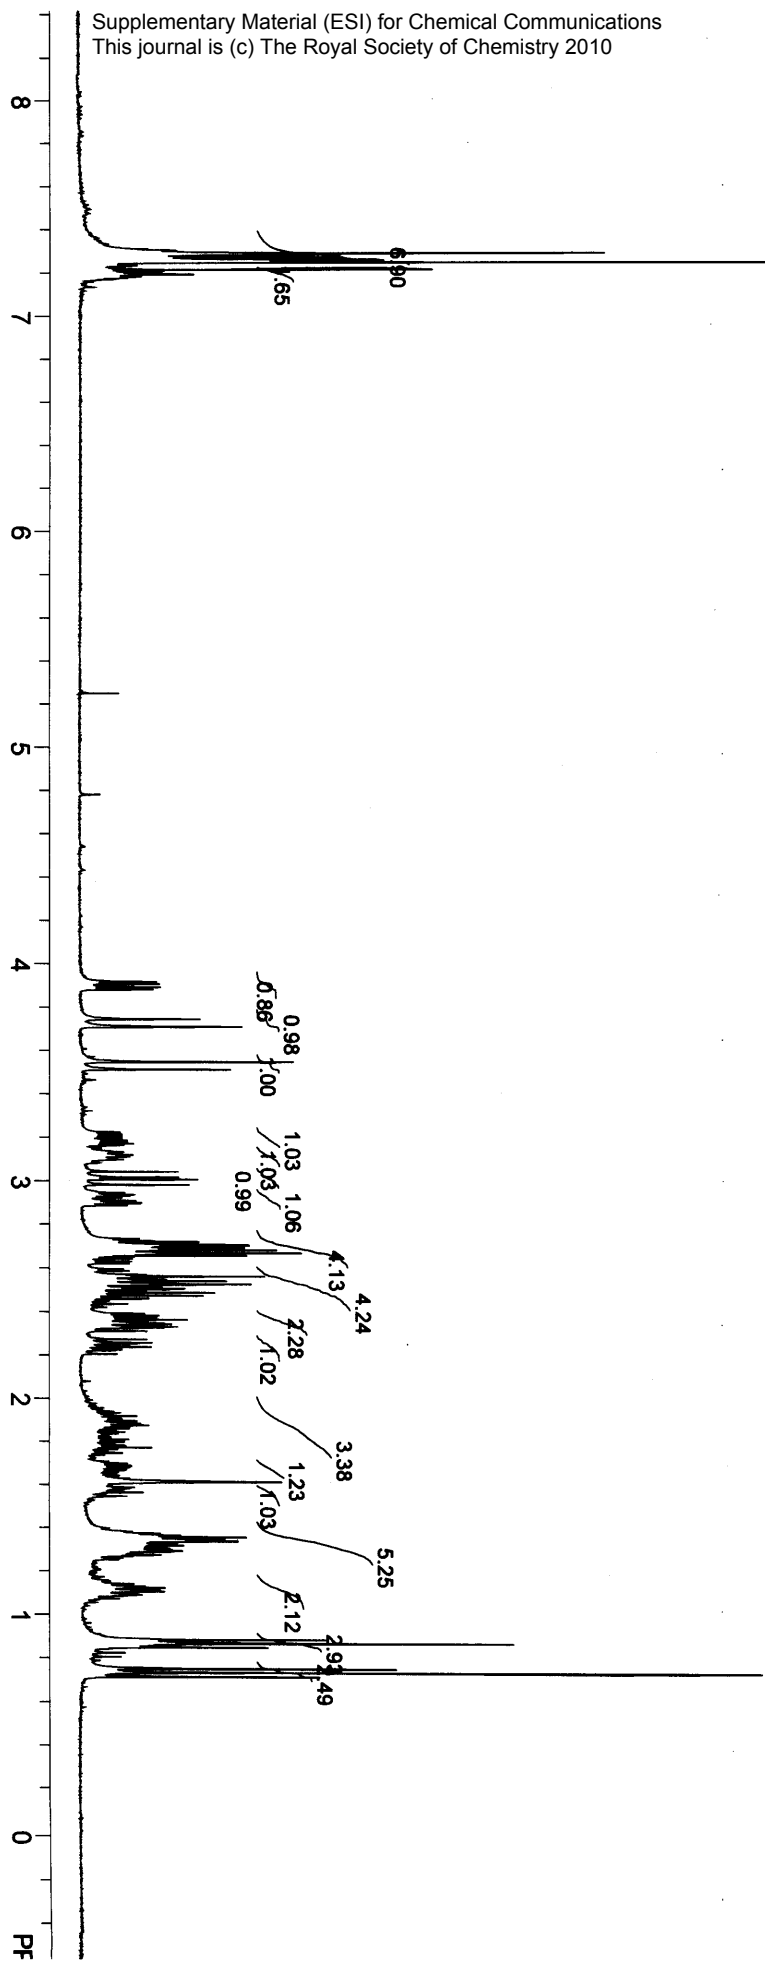

y\w-1-231-mixture-c

Data Collected on:  
nmr500-inova500  
Archive directory:  
/export/home/vnmr1/vnmrsys/data  
Sample directory:

File: CARBON

Pulse Sequence: s2pul  
Solvent: cdcl3  
Temp. 22.0 C / 295.1 K  
Operator: lye

Relax. delay 3.000 sec  
Pulse 58.7 degrees  
Acq. time 1.300 sec  
Width 40000.0 Hz  
1842 repetitions  
OBSERVE C13, 125.6889847 MHz  
DECUPLE H1, 499.8588575 MHz  
Power 36 db  
on during acquisition  
off during delay  
WALTZ-16 modulated  
DATA PROCESSING  
Line broadening 0.5 Hz  
FT size 131072  
Total time 0 min

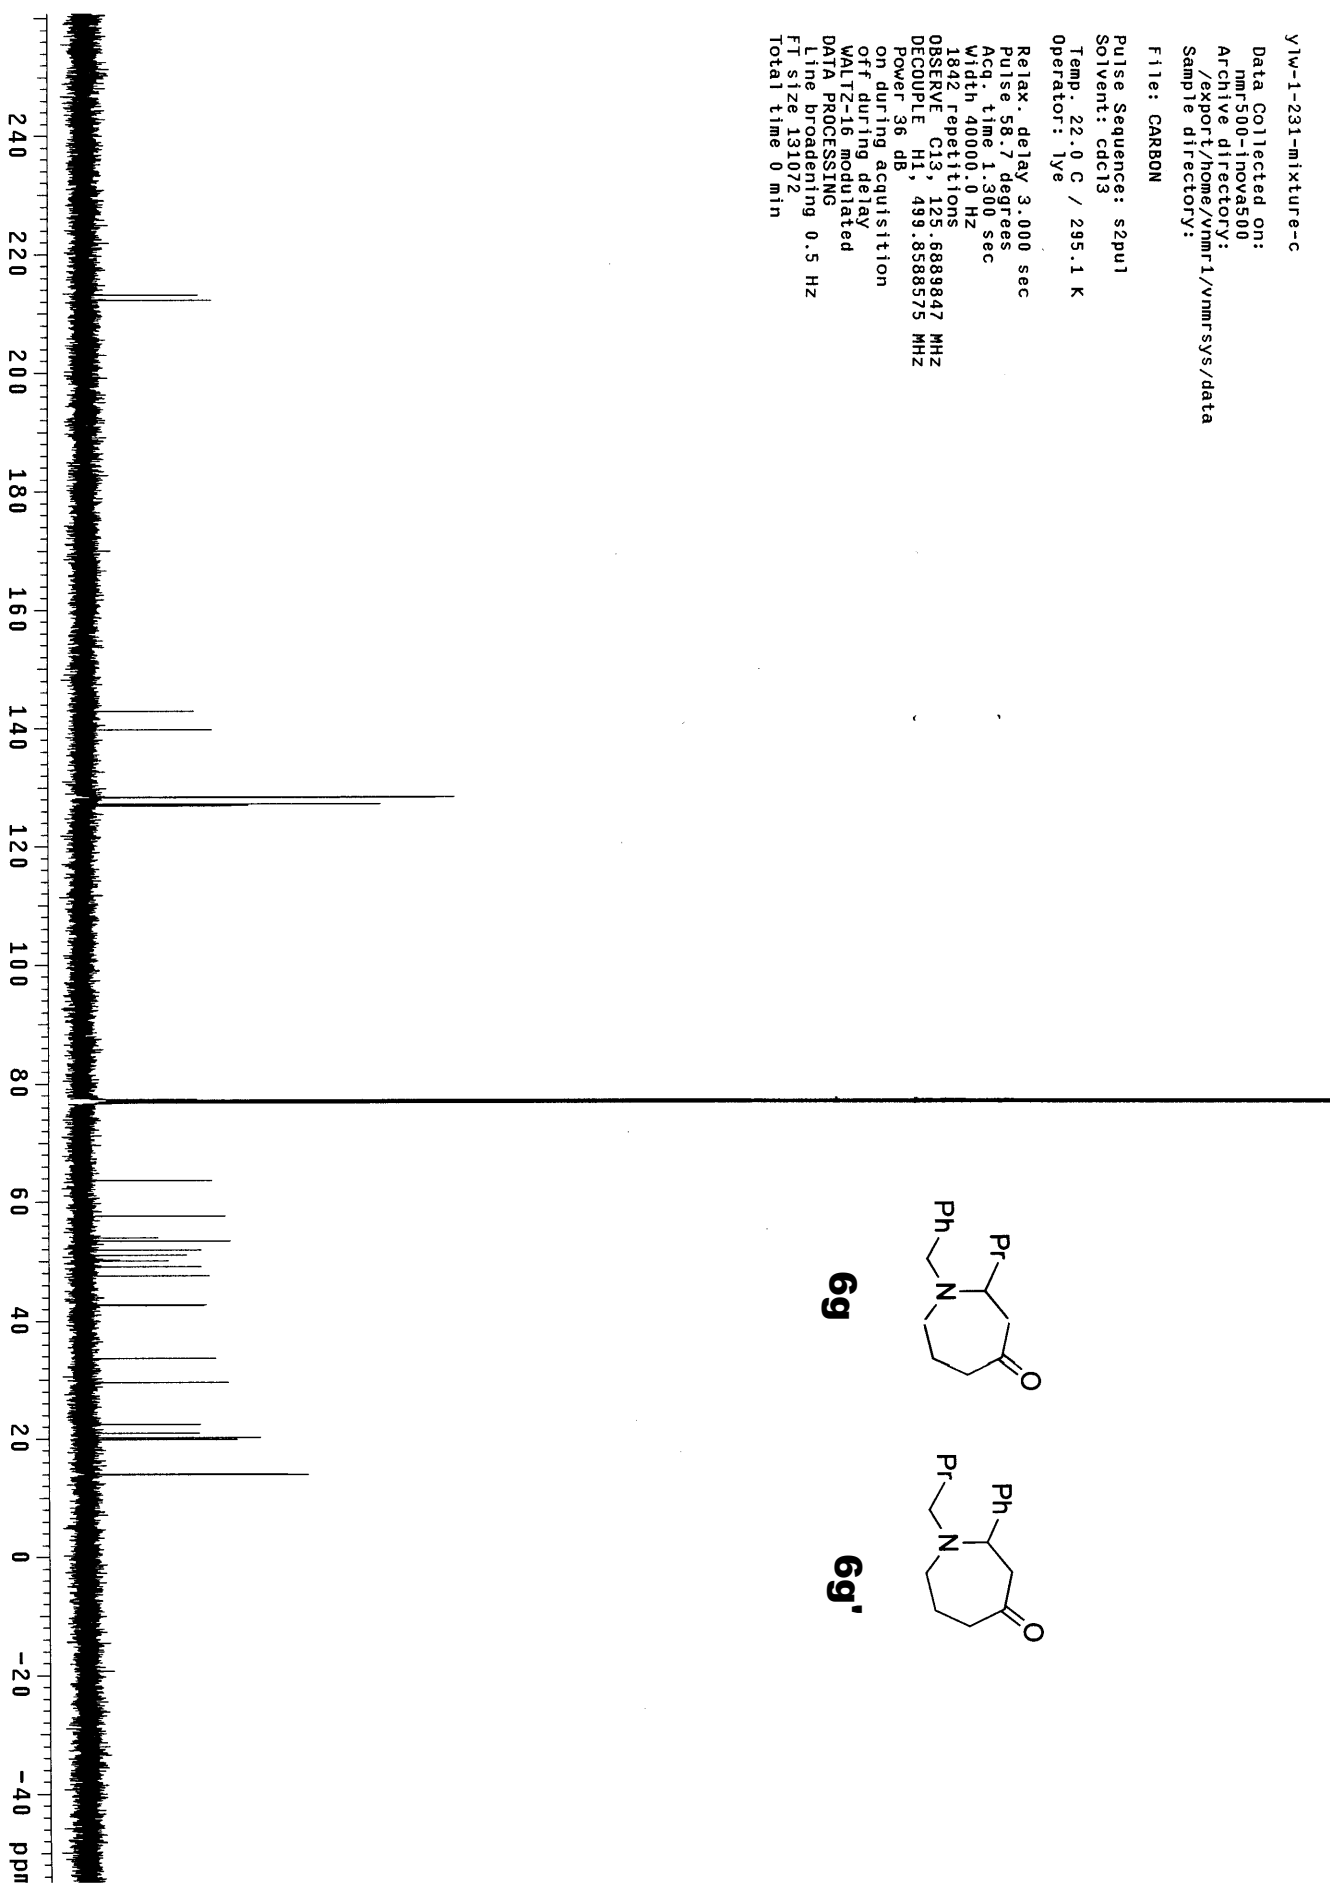

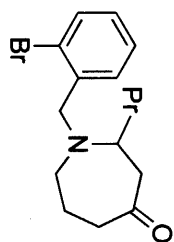

**6h**

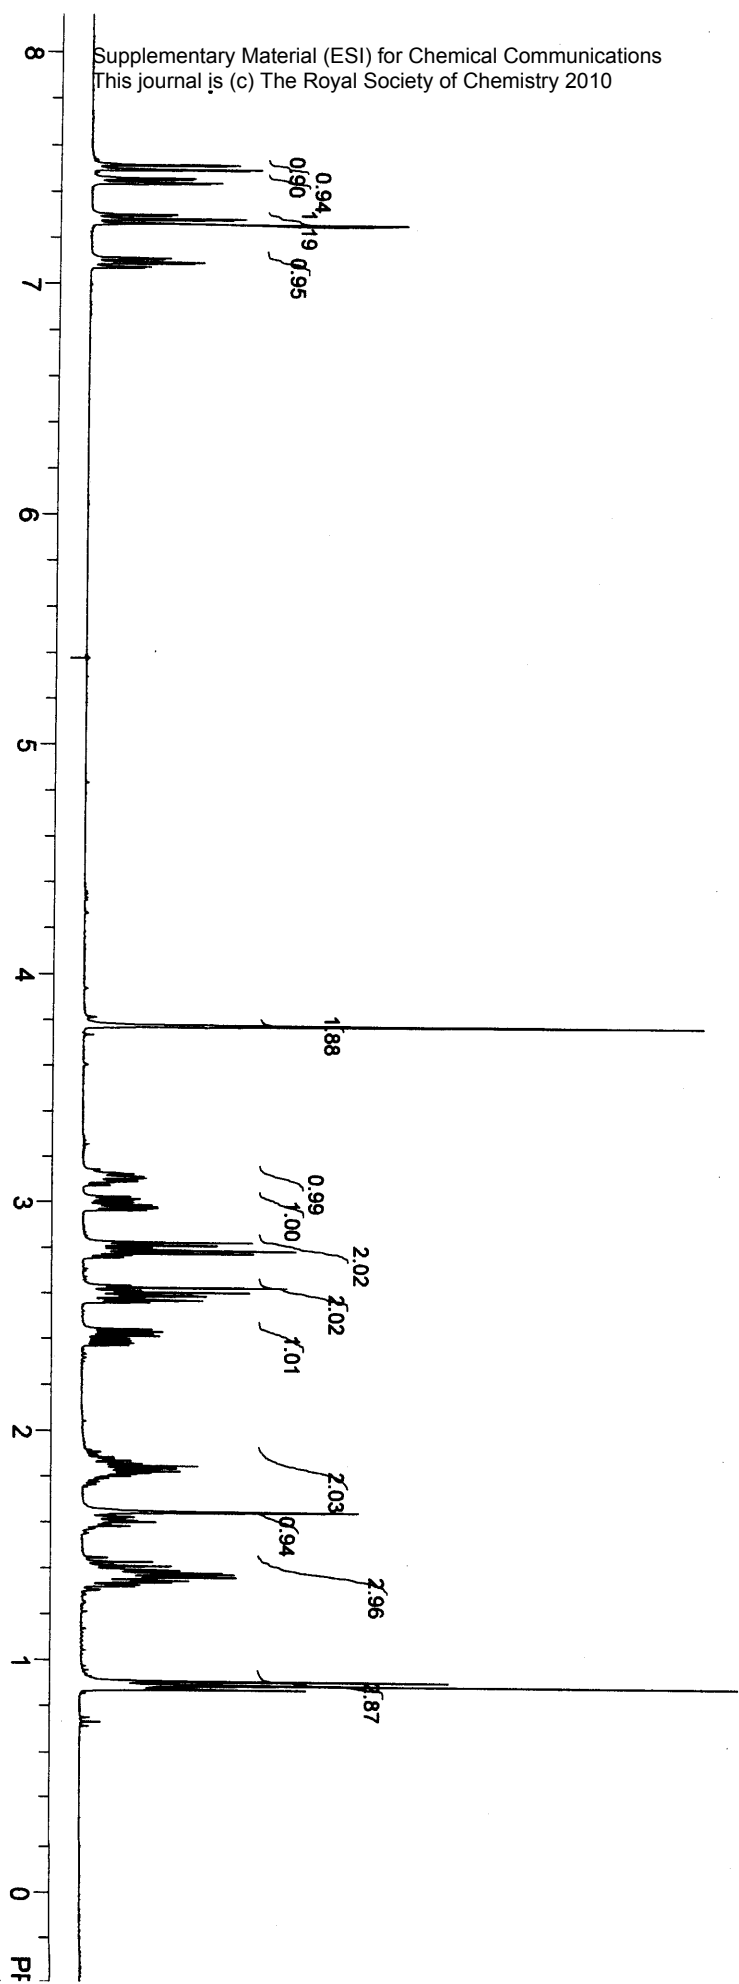

y1w-1-252-c

Data Collected on:  
nmr-500-inova500  
Archive directory:  
/export/home/vnmr1/vnmrSYS/data  
Sample directory:

File: CARBON

Pulse Sequence: s2pul  
Solvent: cdc13

Temp. 22.0 C / 295.1 K  
Operator: lye

Relax. delay 3.000 sec

Pulse 58.7 degrees

Acq. time 1.300 sec

Width 40000.0 Hz

126 repetitions

OBSERVE C13, 125.088986 MHz

DECOUPLE H1, 499.8588575 MHz

Power 36 db

on during acquisition

off during delay

WALTZ-16 modulated

DATA PROCESSING

Line broadening 0.5 Hz

FT size 131072

Total time 0 min

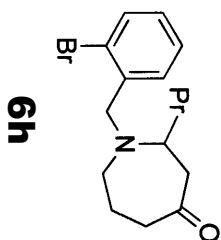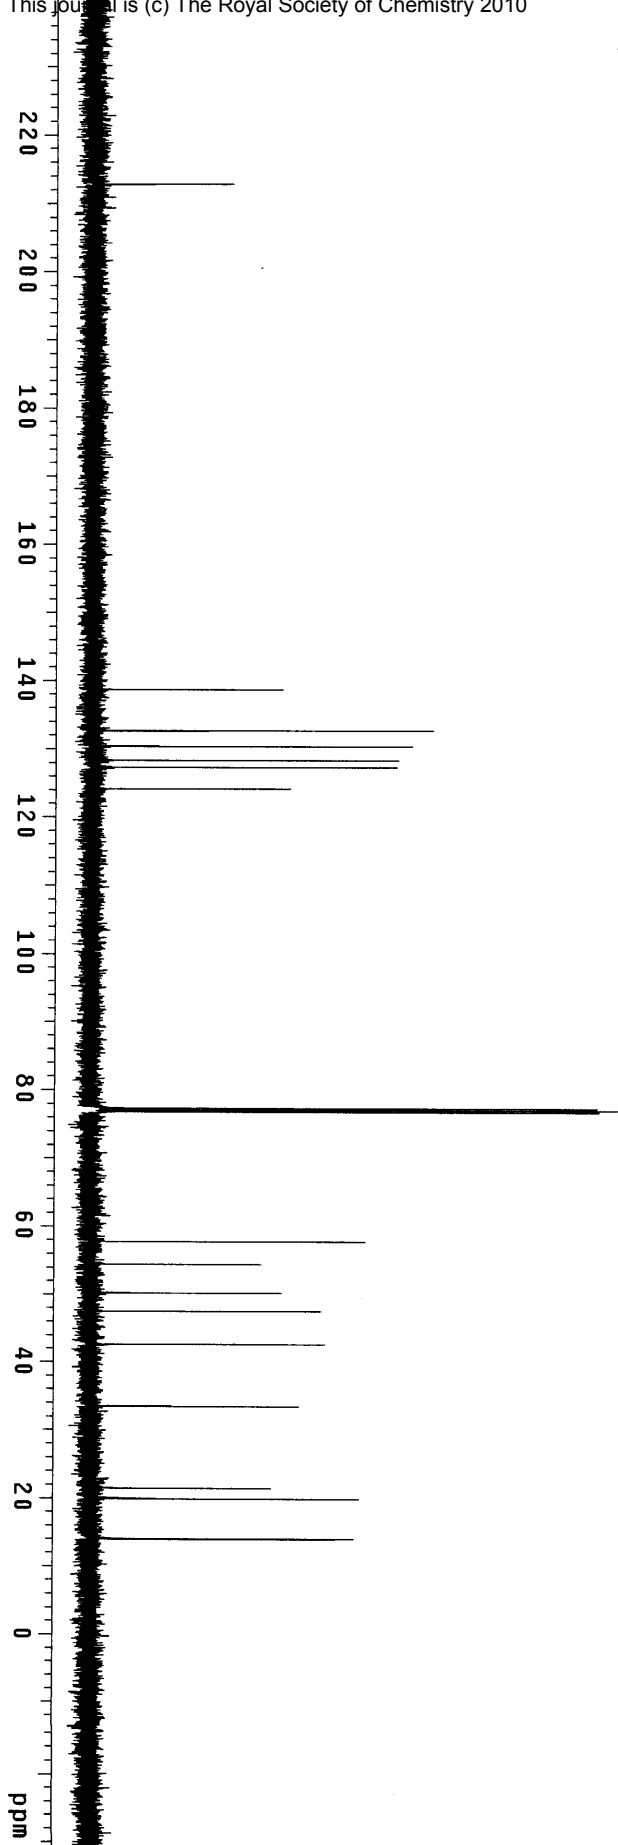

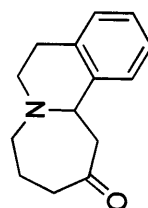

**6i**

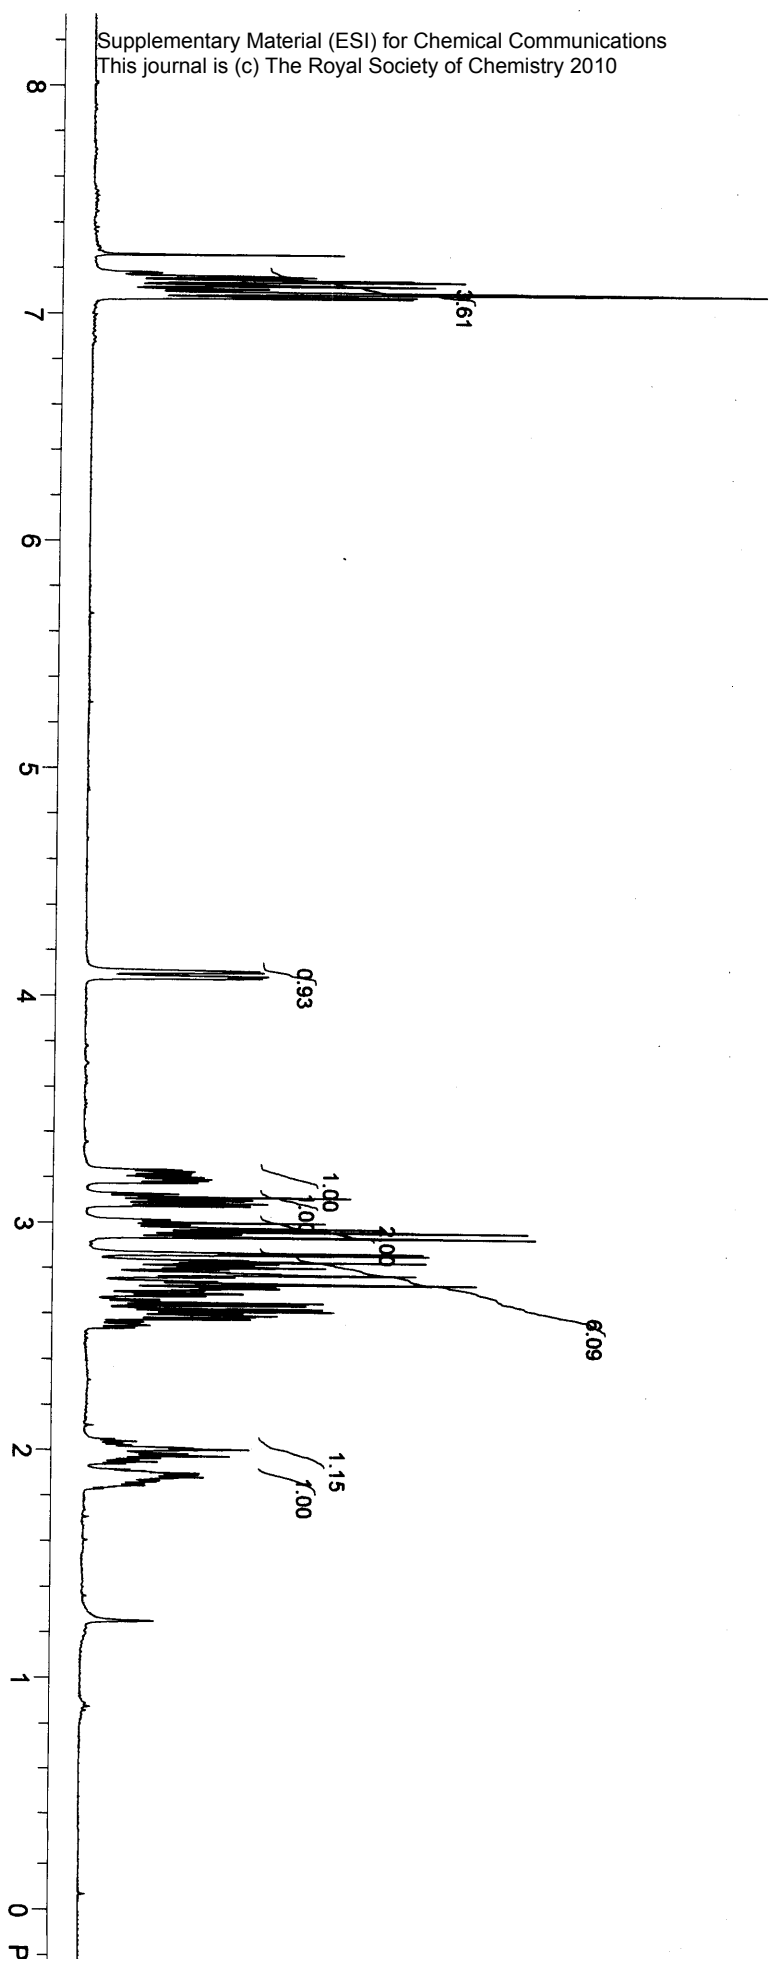

STANDARD CARBON PARAMETERS

Data Collected on:  
nmr500-inova500  
Archive directory:  
/export/home/vnmr1/vnmrSYS/data  
Sample directory:

File: CARBON

Pulse Sequence: szpul  
Solvent: cdcl3  
Temp. 22.0 C / 295.1 K  
Operator: lye

Relax. delay 3.000 sec  
Pulse 58.7 degrees  
Acq. time 1.300 sec  
Width 40000.0 Hz  
92 repetitions  
OBSERVE C13, 125.688902 MHz  
DECOUPLE H1, 499.858575 MHz  
Power 36 dB  
on during acquisition  
off during delay  
WALTZ-16 modulated  
DATA PROCESSING  
Line broadening 0.5 Hz  
FT size 131072  
Total time 0 min

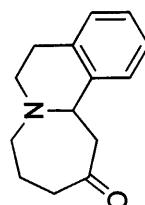

**6i**

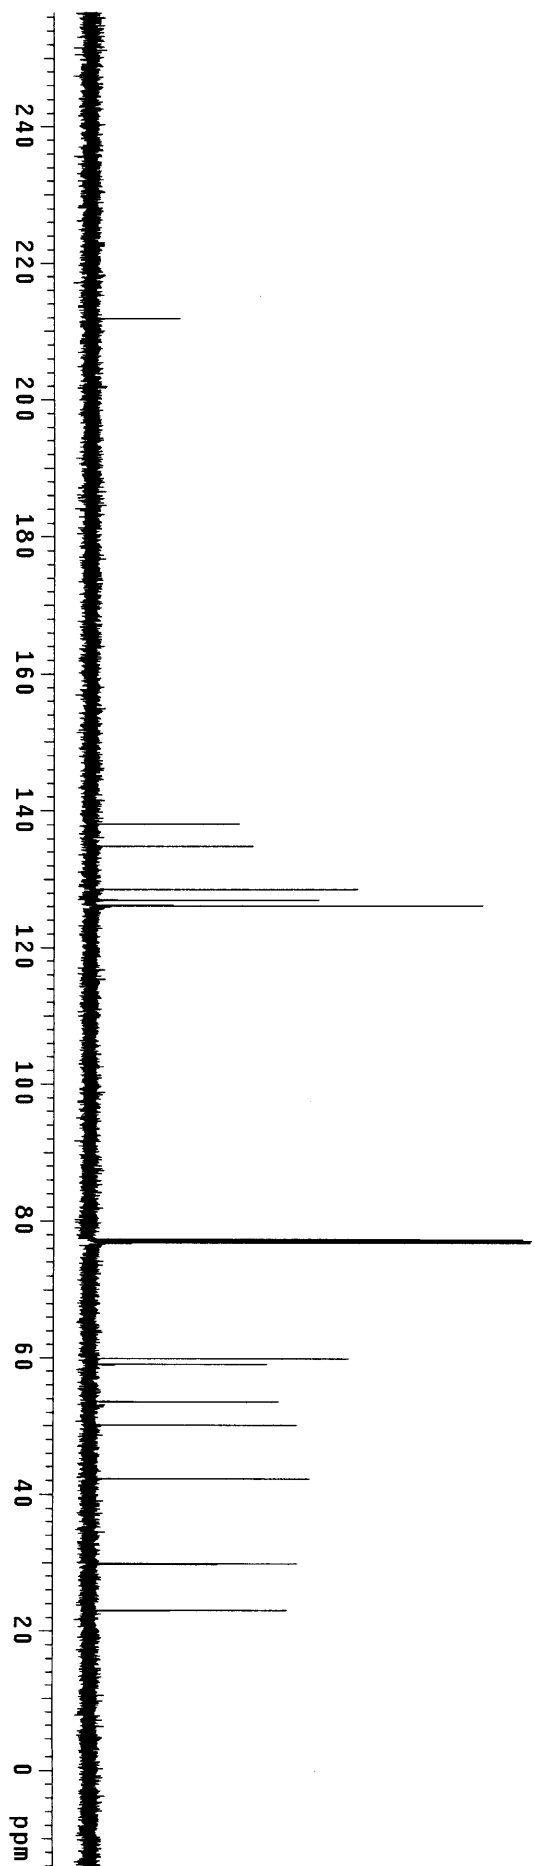

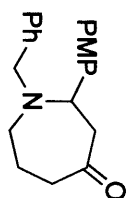

**6j**

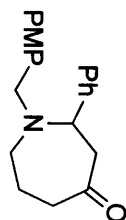

**6j'**

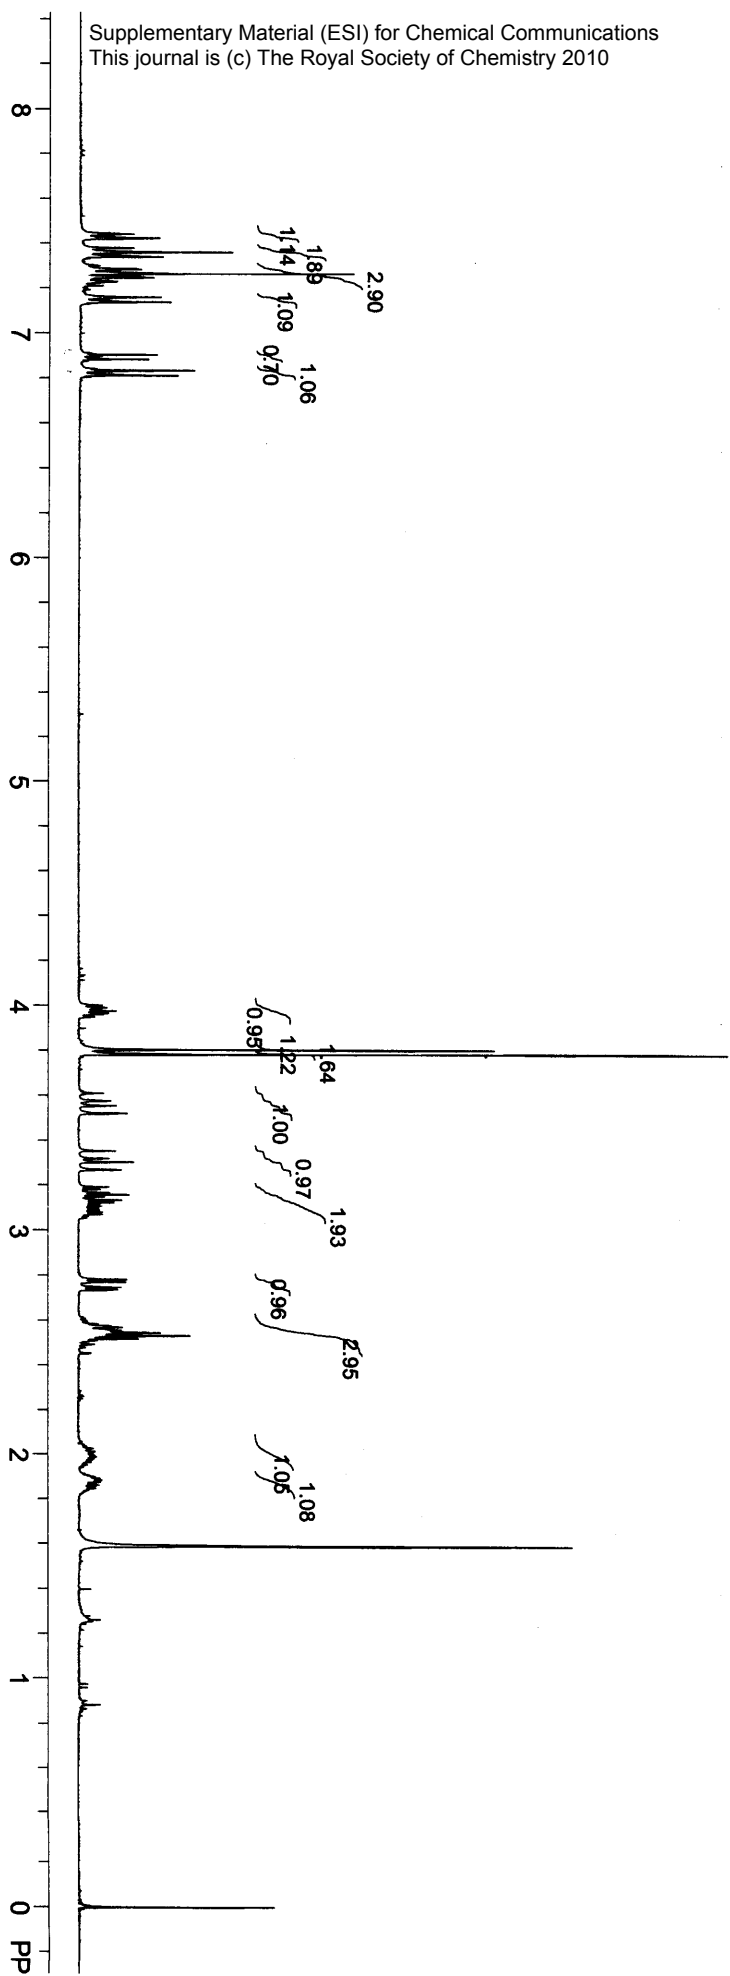

# STANDARD CARBON PARAMETERS

Data Collected on:  
nmr500-inova500  
Archive directory:  
/export/home/vnmr1/vnmrsys/data  
Sample directory:

File: CARBON

Pulse Sequence: szpul  
Solvent: cdcl3

Temp. 22.0 C / 295.1 K  
Operator: lye

Relax. delay 3.000 sec  
Pulse 58.7 degrees  
Acq. time 1.500 sec  
Width 40000.0 Hz  
780 repetitions  
OBSERVE C13, 125.6889847 MHz  
DECOUPLE H1, 499.8588575 MHz  
Power 36 dB  
on during acquisition  
off during delay  
WALTZ-16 modulated  
DATA PROCESSING  
Line broadening 0.5 Hz  
FT size 131072  
Total time 0 min

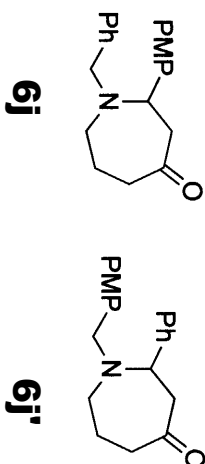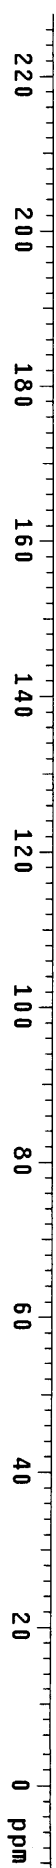

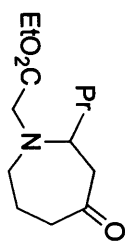

**6k**

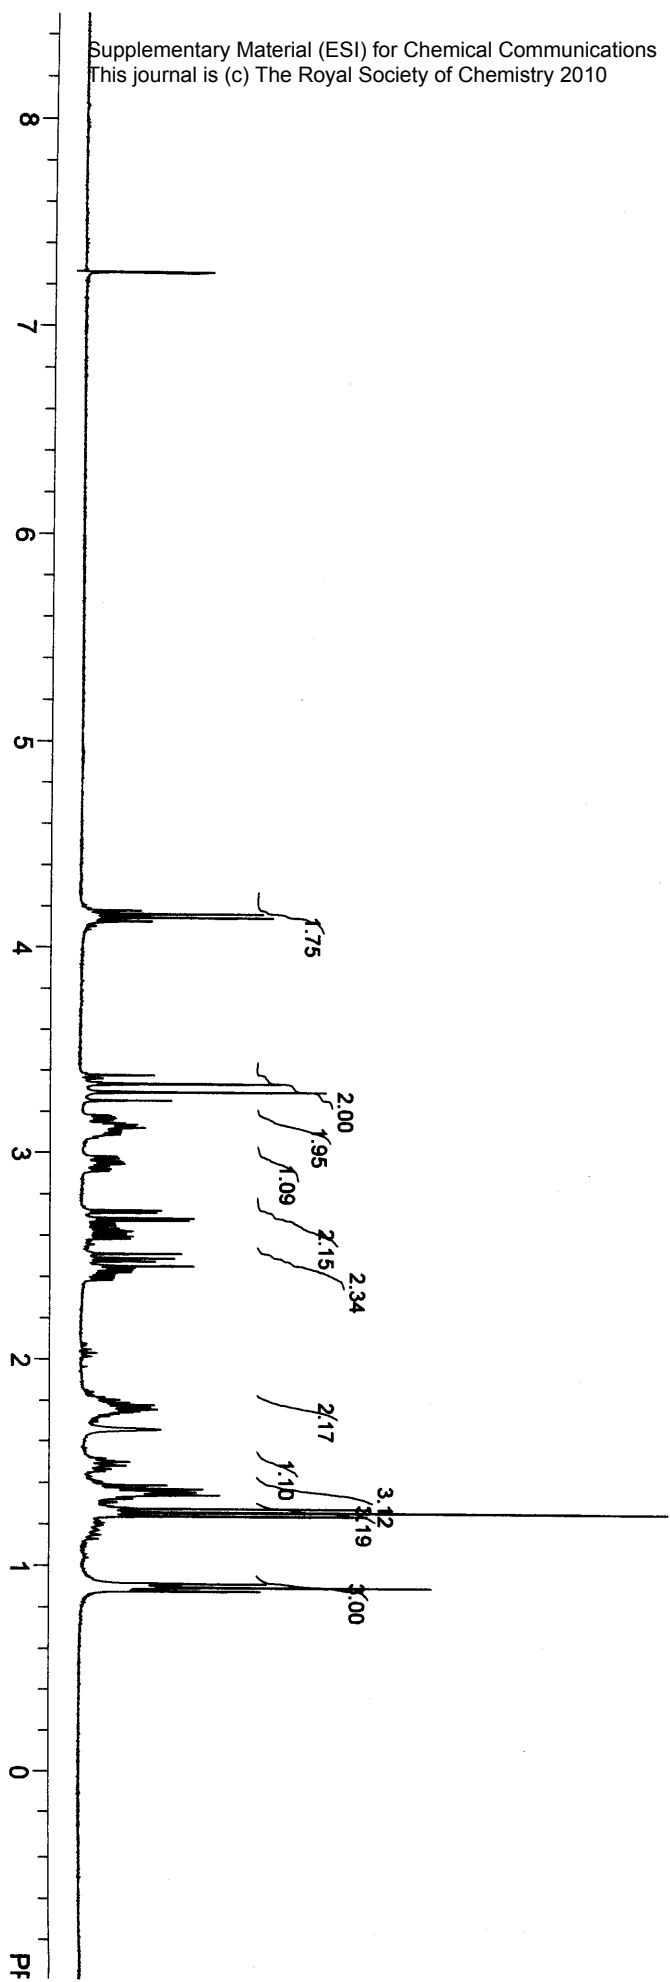

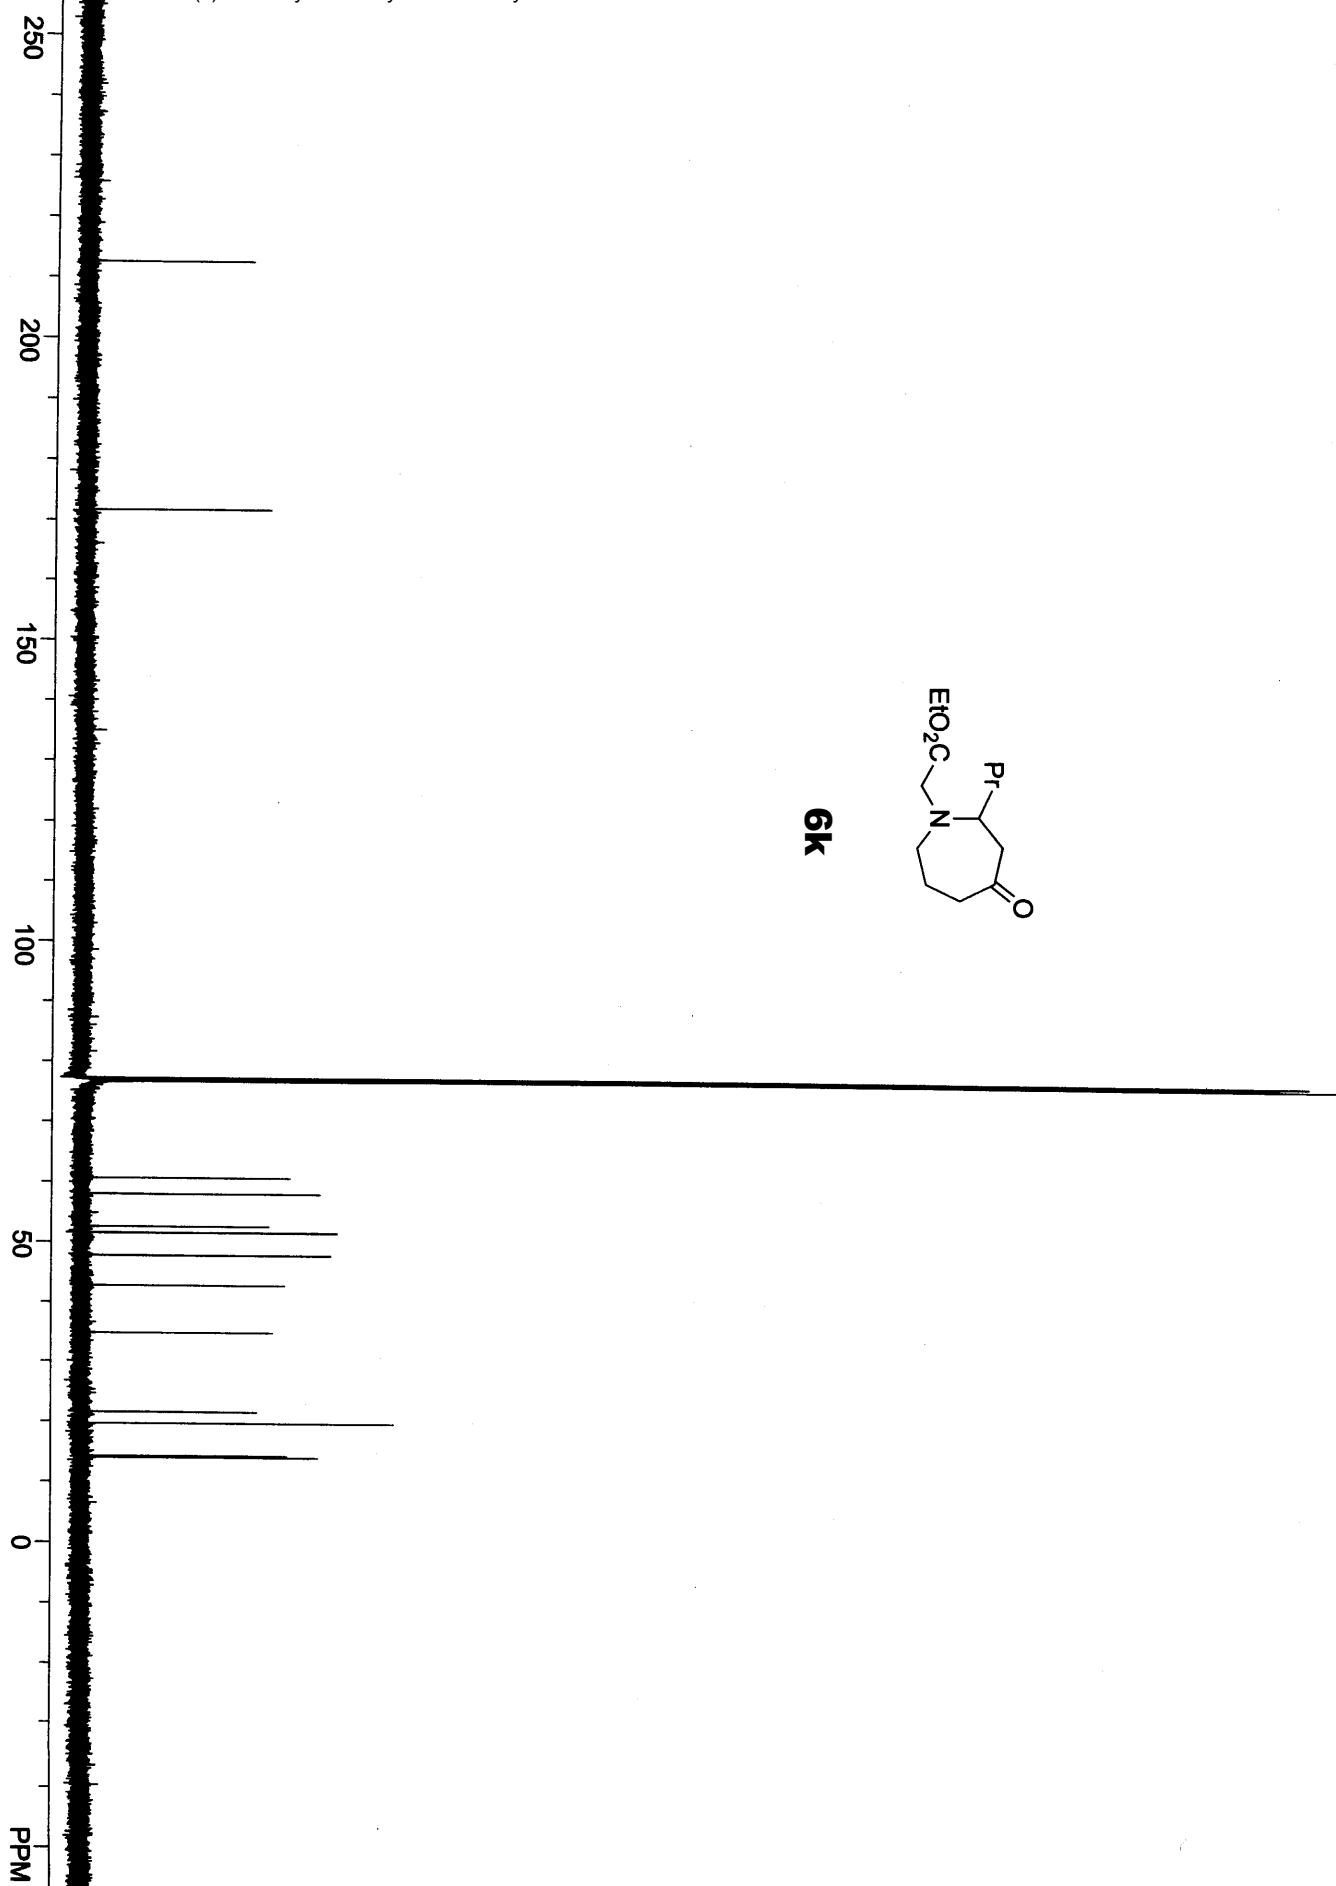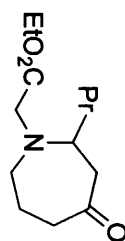

**6k**

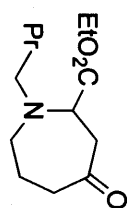

**6k**

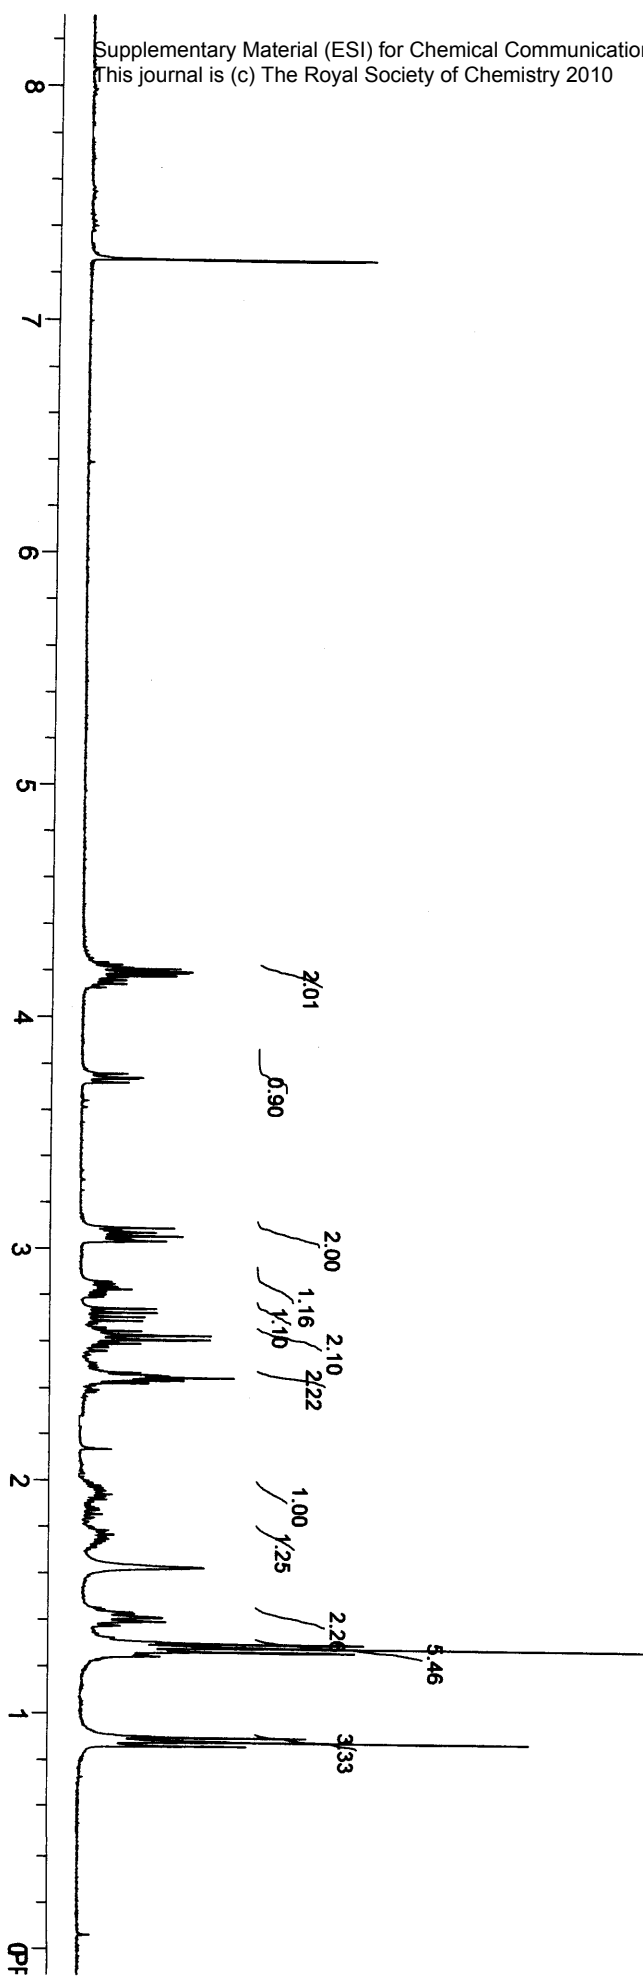

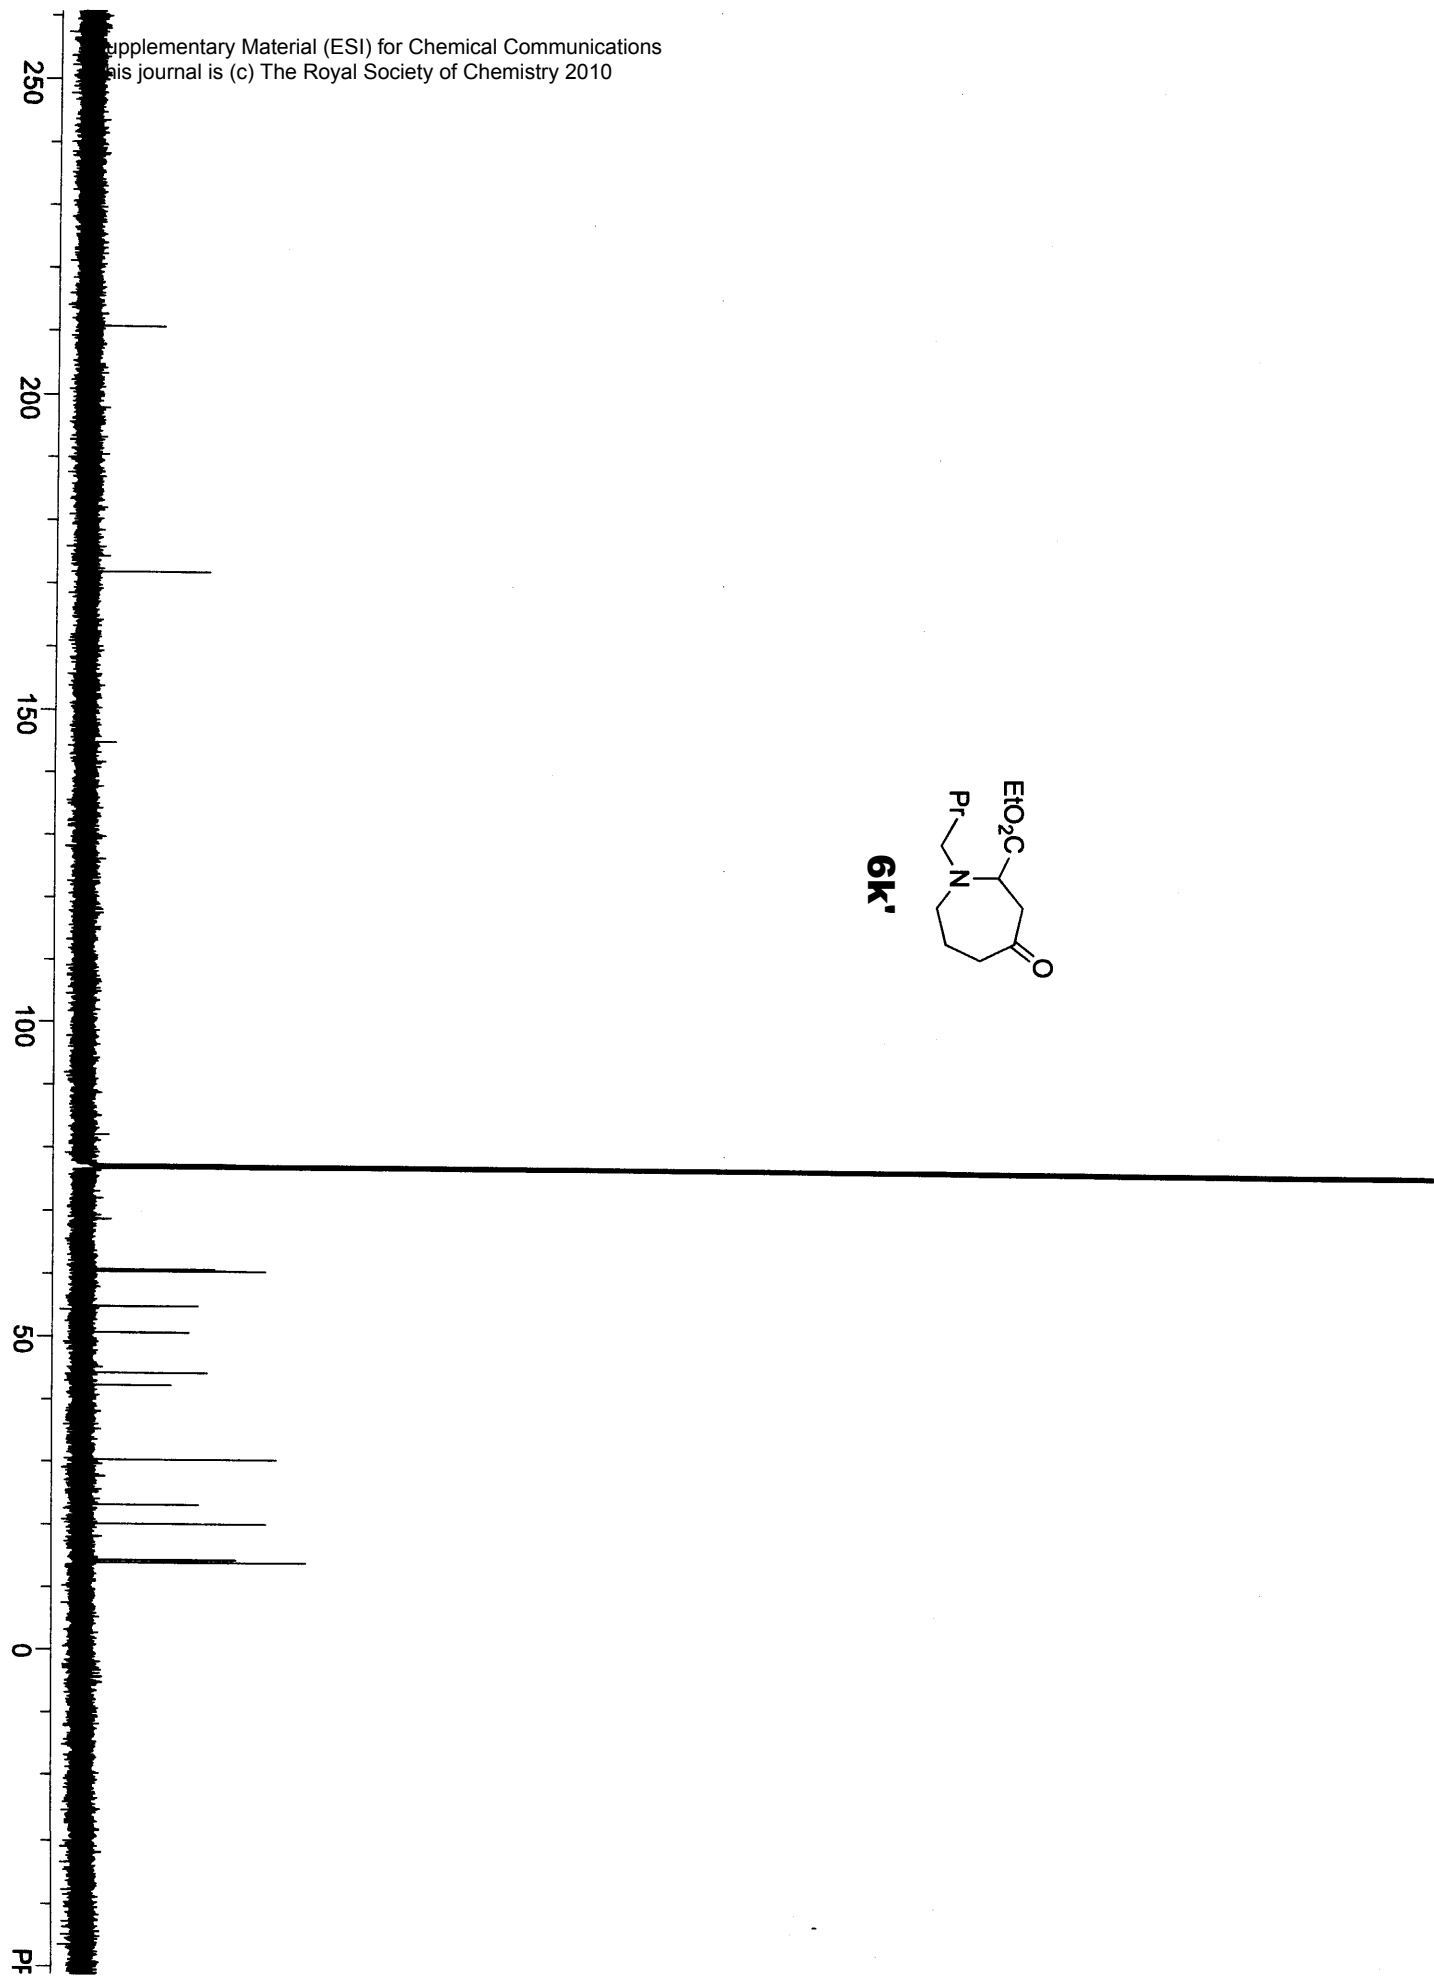

11cu1-87-1-1H

Archive directory:  
Sample directory:

Pulse Sequence: s2pul  
Solvent: cdcl3  
Temp. 25.0 C / 298.1 K  
File: 11cu1-87-1-1H  
INNOVA-500 "nmrserver"

Relax. delay 1.000 sec  
Pulse 45.0 degrees  
Acq. time 2.049 sec  
Width 6410.3 Hz  
28 repetitions  
OBSERVE H1, 400.0568165 MHz  
DATA PROCESSING  
Resol. enhancement -0.0 Hz  
Ft size 65536  
Total time 6 min, 31 sec

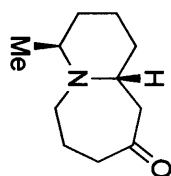

**61**

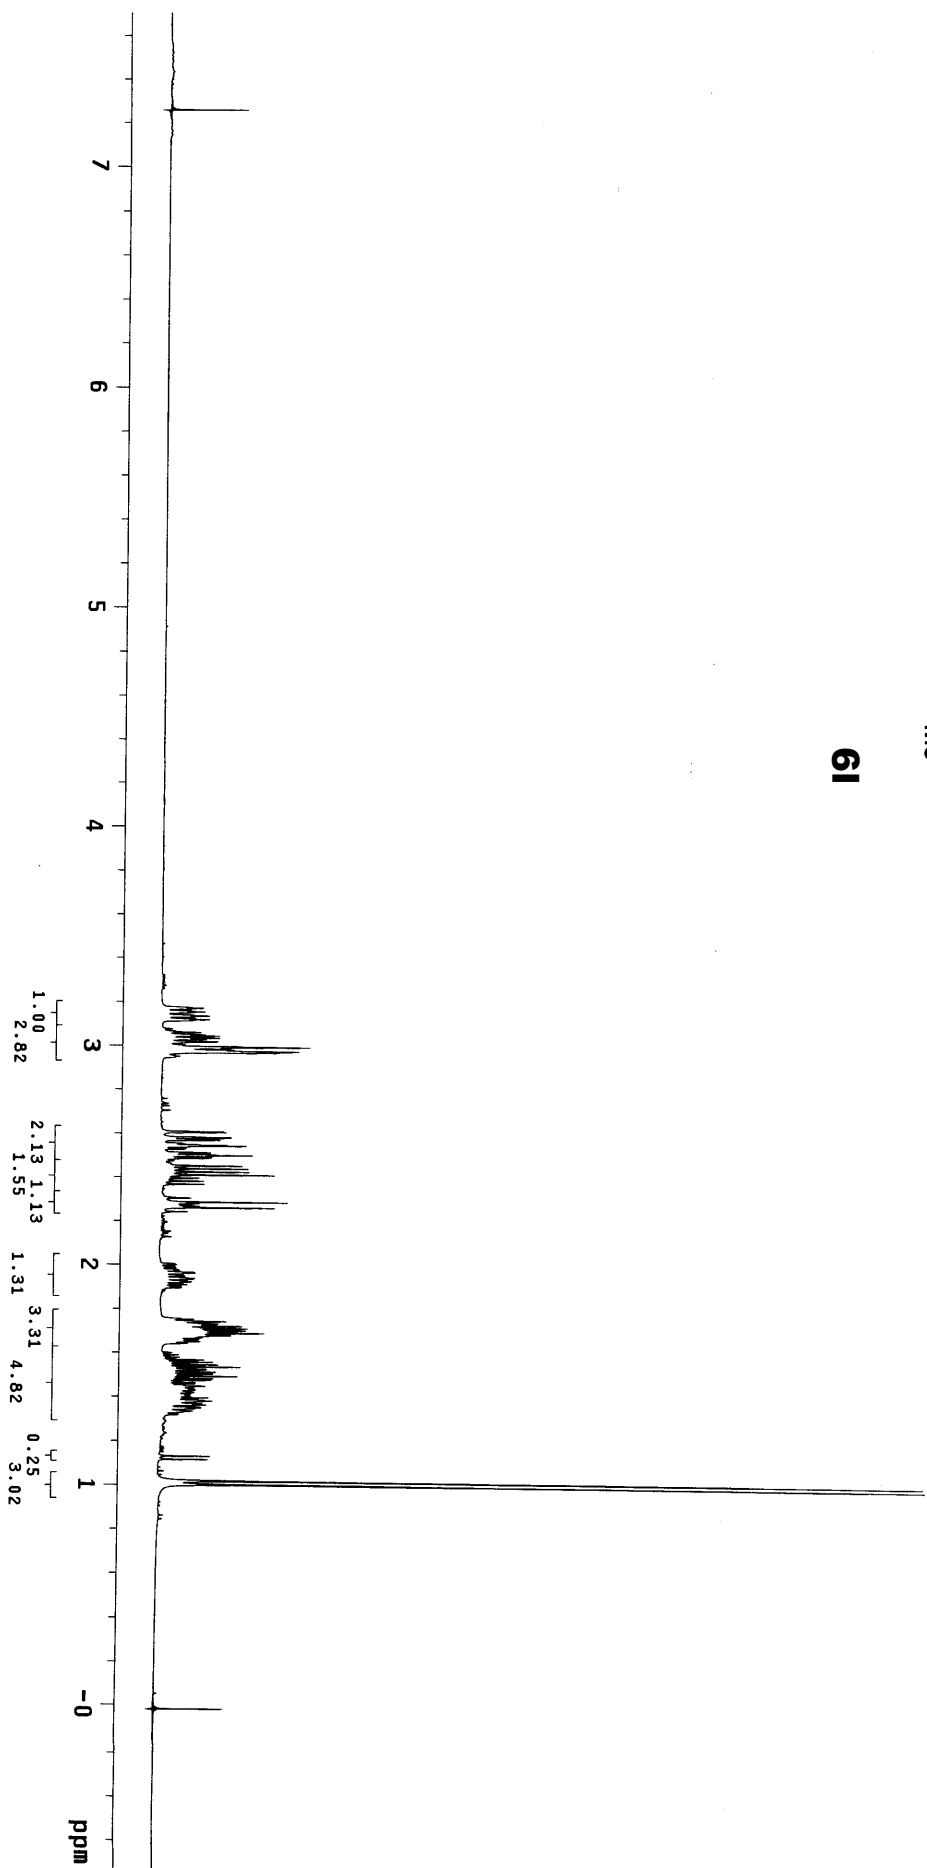

Automation directory: /home/walkup/vnmrSYS/data/auto\_2009.06.08\_04  
File: exp  
Sample id: tmpstudy  
Pulse Sequence: szpul  
Solvent: cdcl3  
Temp: 22.0 C / 295.1 K  
Operator: walkup  
VNMRS-500 "nmr-500"  
Relax. delay 1.000 sec  
Pulse 45.0 degrees  
Acq. time 1.300 sec  
Width 30487.8 Hz  
17508 repetitions  
OBSERVE C13, 125.6732827 MHz  
DECOUPLE H1, 499.7964114 MHz  
Power 39 dB  
continuously on  
WALTZ-16 modulated  
DATA PROCESSING  
Line broadening 0.5 Hz  
FT size 131072  
Total time 12 hr, 49 min, 47 sec

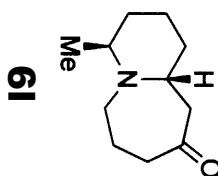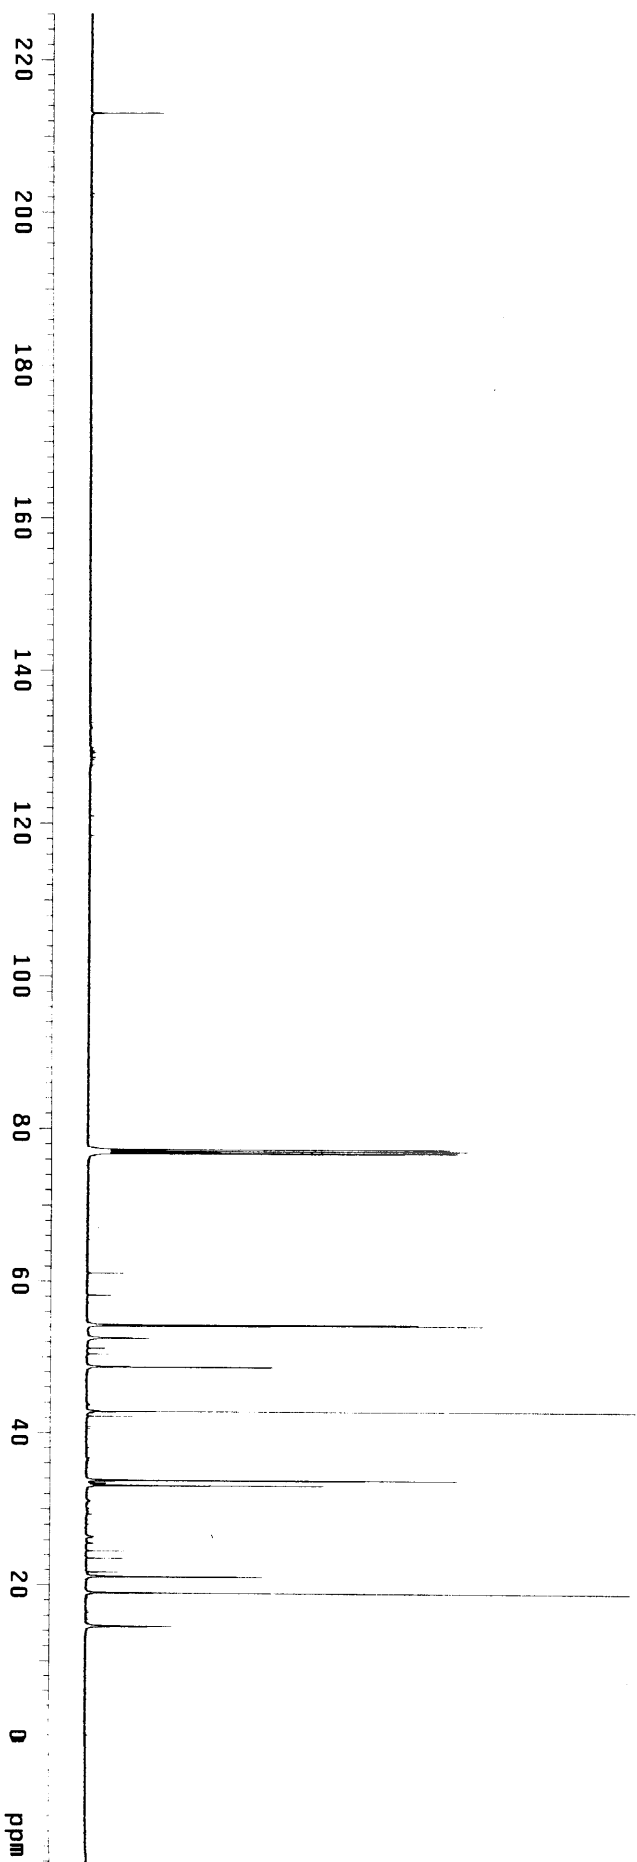

Automation directory: /home/walkup/vnmrsys/data/auto-2009.06.01  
file : /home/walkup/vnmrsys/data/ARGENTA/Zhang/ticut/ticut-78-1-COSY.fid  
Sample id : s\_20090601\_001

Pulse Sequence: gCOSY

Solvent: cdcl3  
Temp: 25.0 C / 298.1 K  
Operator: walkup  
File: ticut-78-1-COSY  
VNMRS-500 "nmr500"

Relax. delay 1.301 sec  
Acq. time 0.128 sec  
Width 8012.8 Hz  
2D Width 8012.8 Hz  
8 repetitions  
512 increments  
OBSERVE H1, 499.7939123 MHz  
DATA PROCESSING  
Sine bell 0.064 sec  
F1 DATA PROCESSING  
Sine bell 0.128 sec  
FT size 8192 x 8192  
Total time 1 hr, 40 min, 58 sec

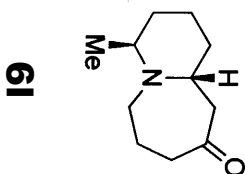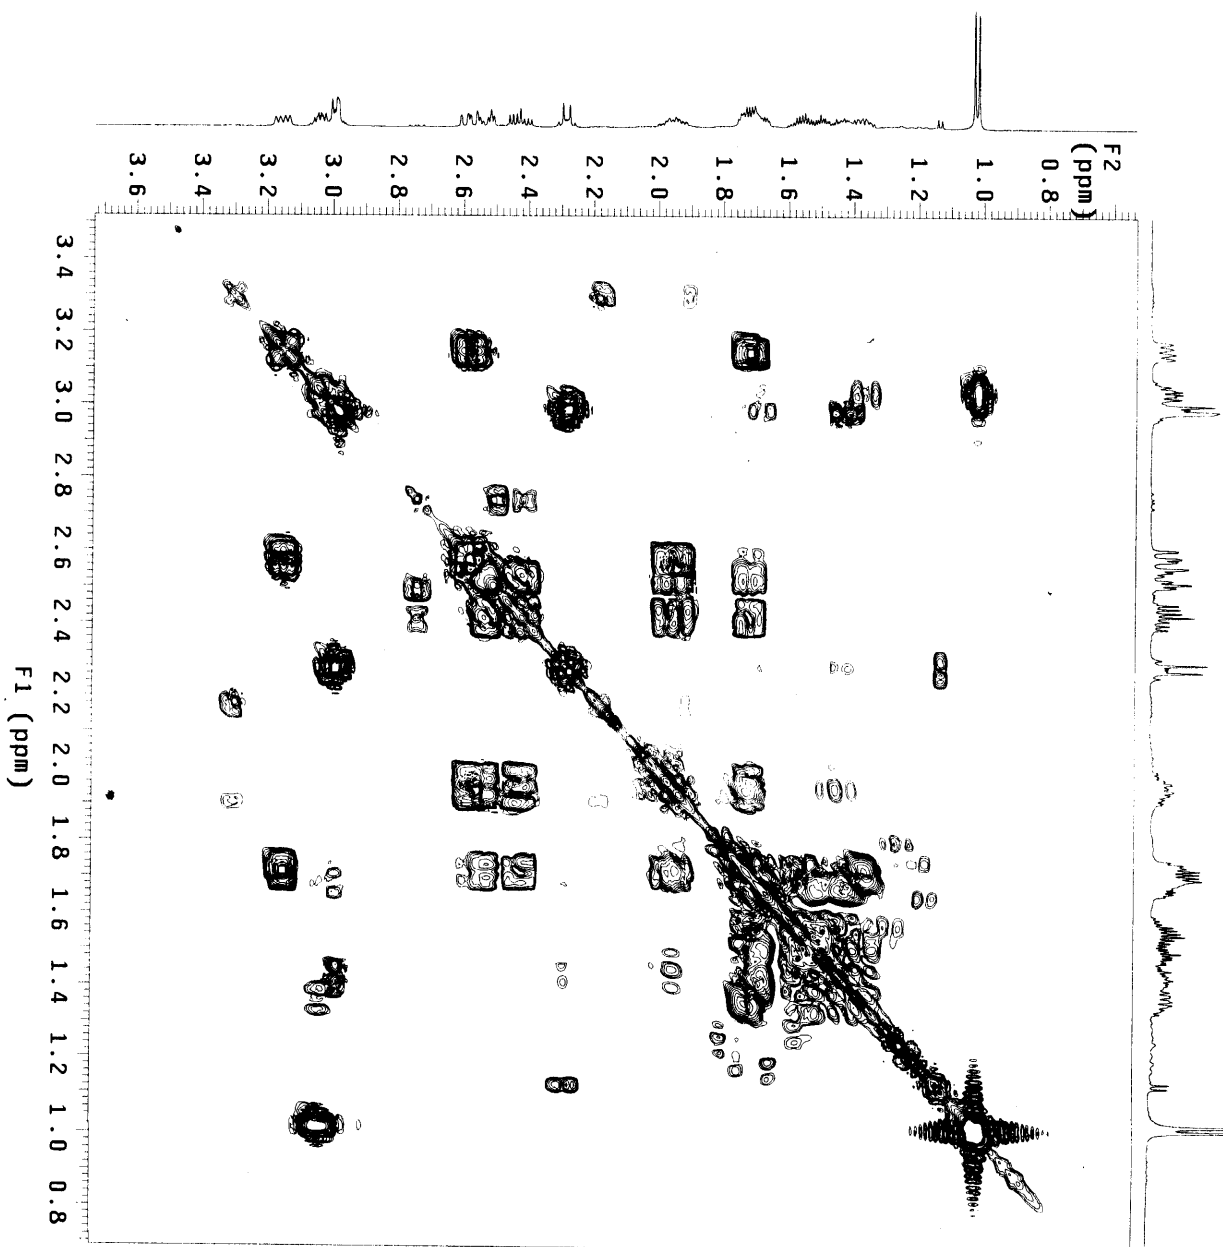

11cui-80-1

Automation directory: /home/walkup/vnmrsys/data/auto\_2009.06.02  
File: exp  
Sample id: tmpstudy

Pulse Sequence: NOESY1D

Solvent: cdcl3  
Temp: 25.0 C / 298.1 K  
Operator: walkup  
VNMRS-500 "nmr500"

Relax. delay 1.000 sec  
Pulse 90.0 degrees  
Mixing 0.500 sec  
Acq. time 1.998 sec  
Width 8012.8 Hz  
1488 repetitions  
OBSERVE H1: 499.7939123 MHz  
DATA PROCESSING  
Line broadening 0.5 Hz  
FT size 32768  
Total time 2 hr, 2 min, 46 sec

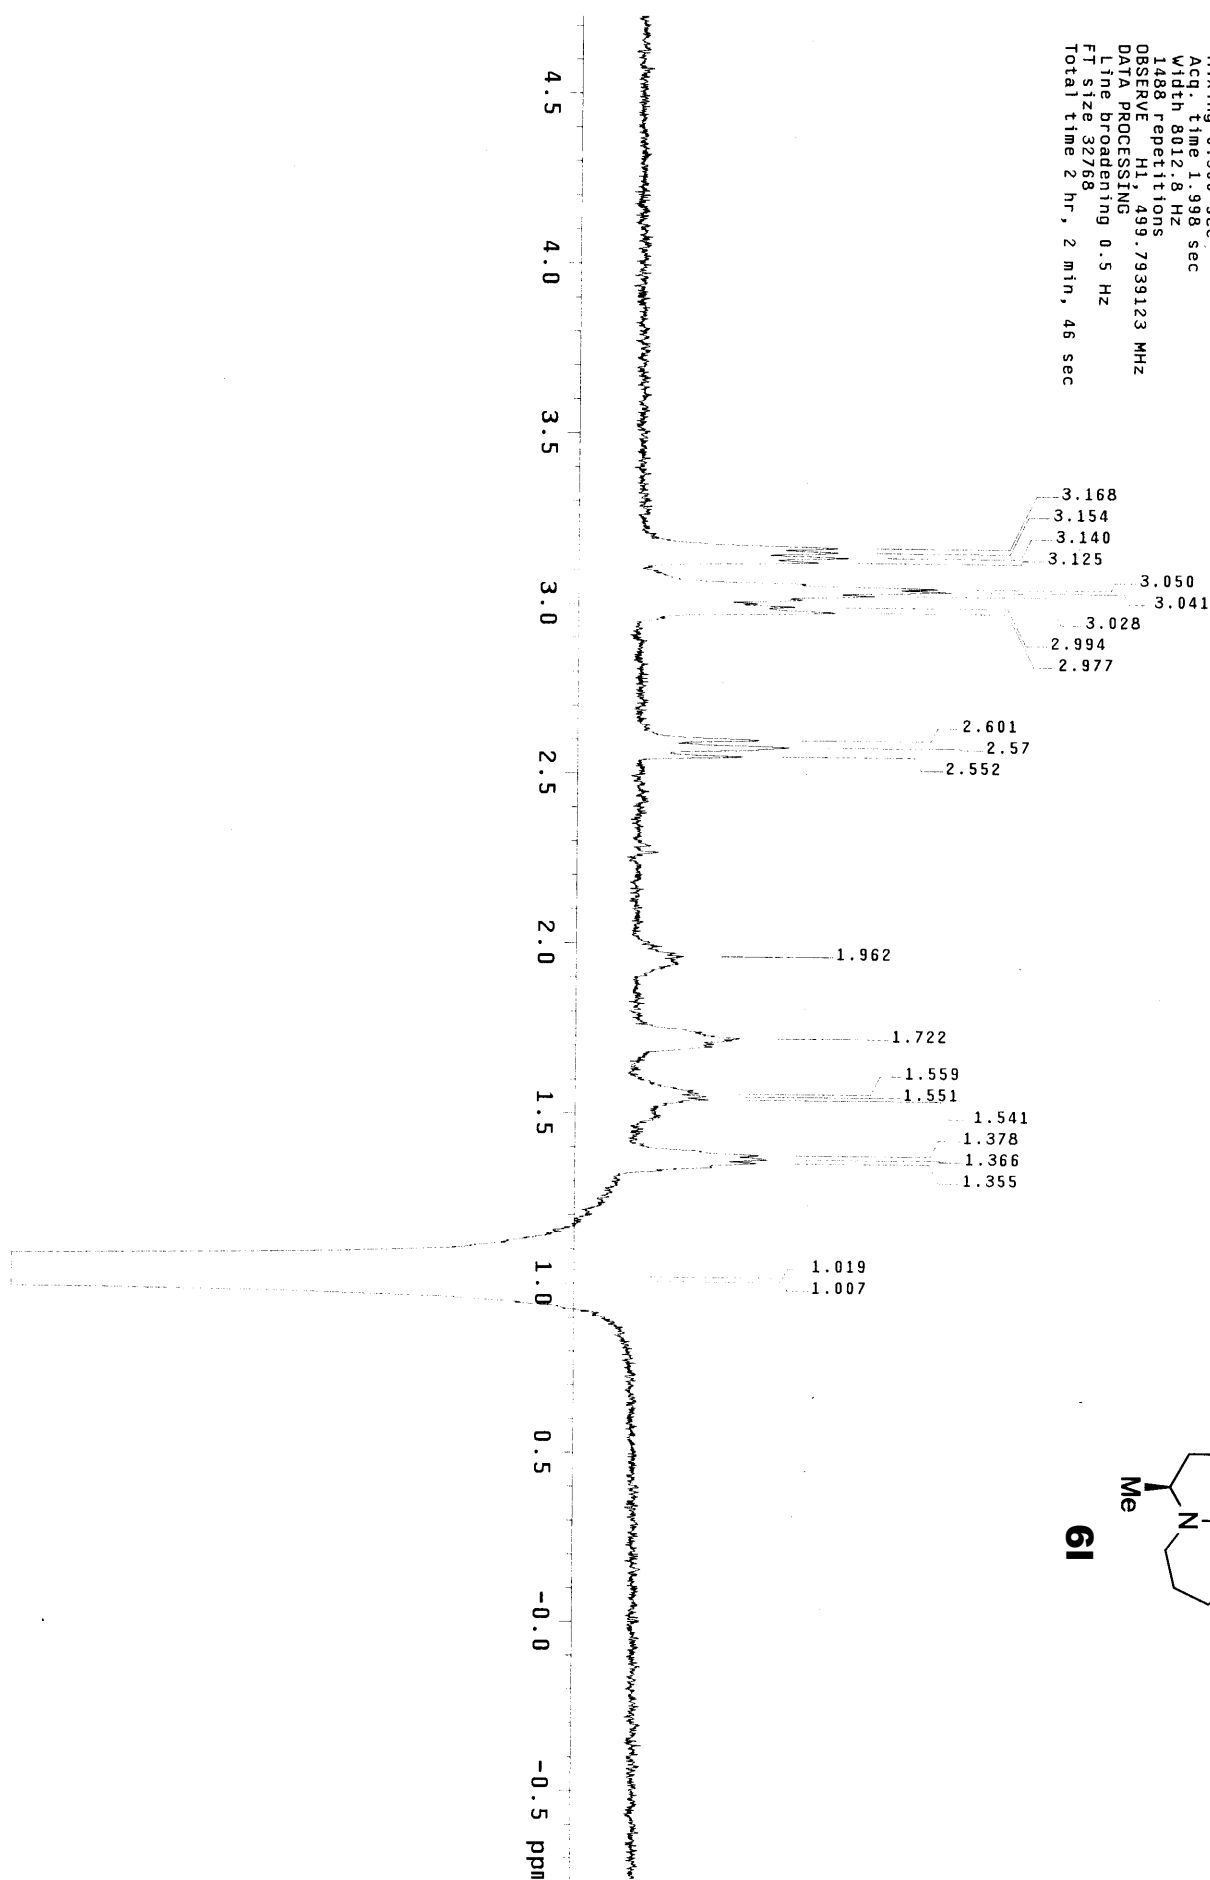

Automation directory: /home/walkup/vnmrSYS/data/auto\_2009.06.17\_01  
File: exp  
Sample id: tmpstudy  
Pulse Sequence: s2pul  
Solvent: cdcl3  
Temp: 22.0 C / 295.1 K  
Operator: walkup  
VNMR-500 "nmr-500"  
Relax. delay 1.000 sec  
Pulse 45.0 degrees  
Acq. time 2.049 sec  
Width 8012.8 Hz  
44 repetitions  
OBSERVE H1, 499.7939035 MHz  
DATA PROCESSING  
Line broadening 0.2 Hz  
FT size 65536  
Total time 6 min, 37 sec

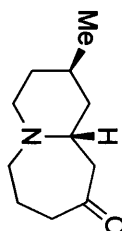

**6m**

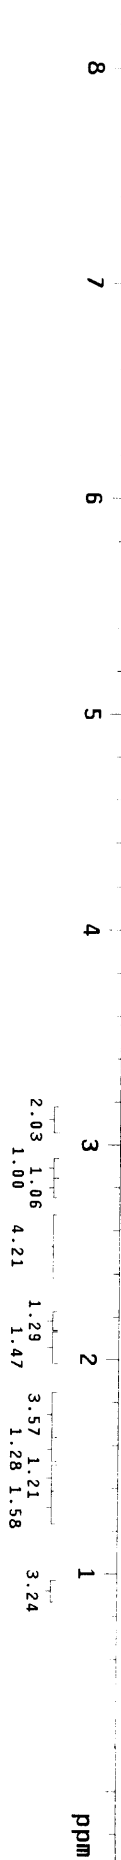

11cui-95-1-13C

Automation directory: /home/waikup/vnmrSYS/data/auto\_2009.06.18\_03

File : exp

Sample id : tmpstudy

Pulse Sequence: szpul

Solvent: cdcl3

Temp: 25.0 C / 298.1 K

Operator: waikup

VNMR-500 "nmr-500"

Relax. delay 1.000 sec

Pulse 45.0 degrees

Acq. time 1.300 sec

Width 30487.8 Hz

9348 repetitions

OBSERVE C13, 125.6732818 MHz

DECOUPLE H1, 499.7964114 MHz

Power 39 dB

continuously on

WALTZ-16 modulated

DATA PROCESSING

Line broadening 0.5 Hz

FT size 131072

Total time 12 hr, 49 min, 47 sec

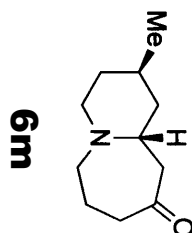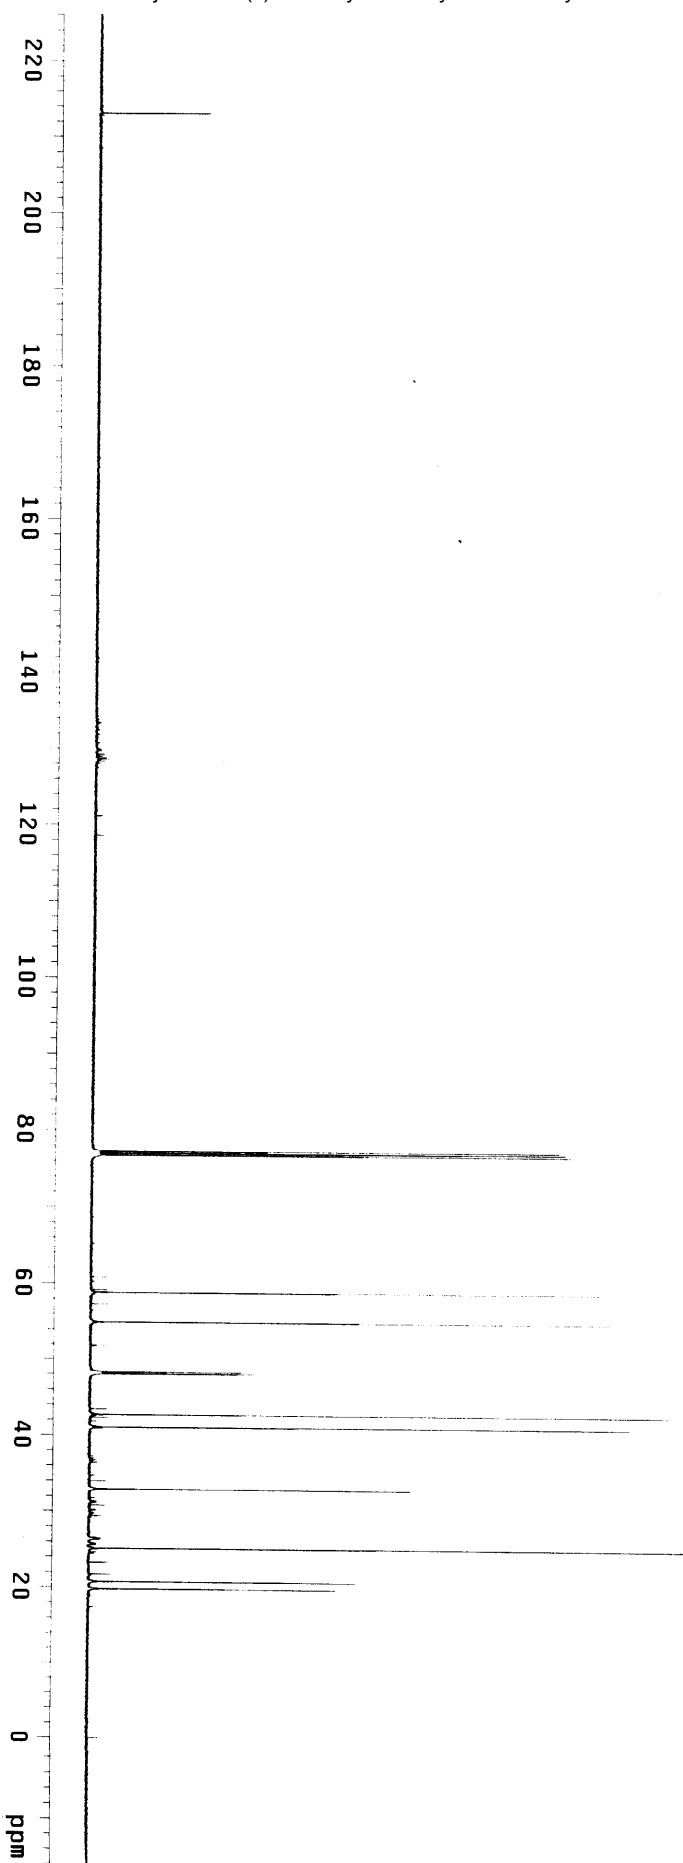

Automation directory: /home/walkup/vnmrSYS/data/auto\_2009.06.17.01  
File: s\_20090617\_001/data/cdc13\_01.fid  
Sample id: s\_20090617\_001

Pulse Sequence: gCOSY

Solvent: cdc13  
Temp: 22.0 C / 295.1 K  
Operator: walkup  
File: cdc13\_01  
Vnmrs-500 "nmr-500"

Relax. delay 1.301 sec  
Acq. time 0.128 sec  
Width 8012.8 Hz  
2D Width 8012.8 Hz  
8 repetitions  
512 increments  
OBSERVE H1 499.7939056 MHz  
DATA PROCESSING  
Sine bell 0.084 sec  
F1 DATA PROCESSING  
Sine bell 0.128 sec  
F1 Size 8192 x 8192  
Total time 1 hr, 40 min, 58 sec

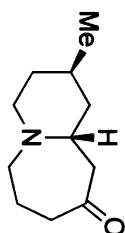

6m

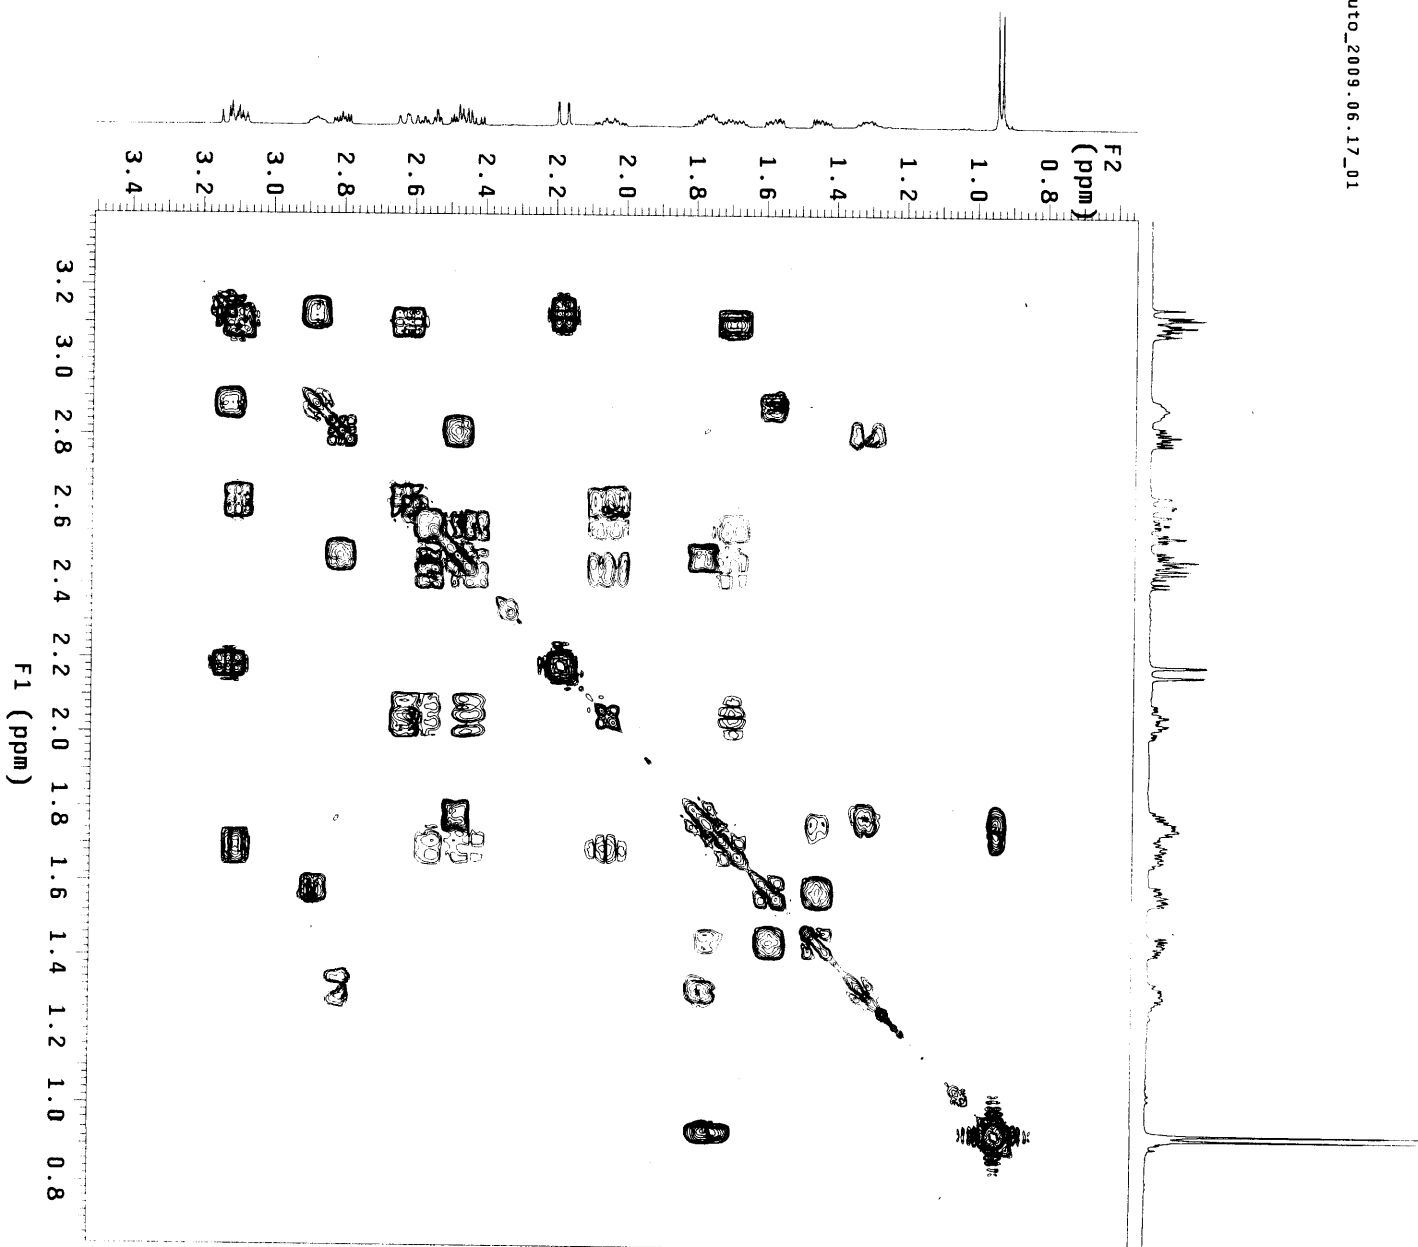

Automation directory: /home/walkup/vnmrSYS/data/auto\_2009.06.18\_04  
File : exp  
Sample id : tmpstudy

Pulse Sequence: NOESY1D

Solvent: cdcl3  
Temp: 25.0 C / 298.1 K  
Operator: walkup  
VNMRS-500 "nmr500"

Relax. delay 1.000 sec  
Pulse 90.0 degrees  
Mixing 0.500 sec  
Acq. time 1.998 sec  
Width 8012.8 Hz  
1952 repetitions  
OBSERVE H1, 499.7939123 MHz  
DATA PROCESSING  
Line broadening 0.5 Hz  
FT size 32768  
Total time 2 hr, 8 min, 24 sec

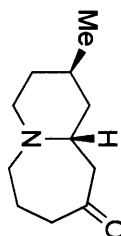

6m

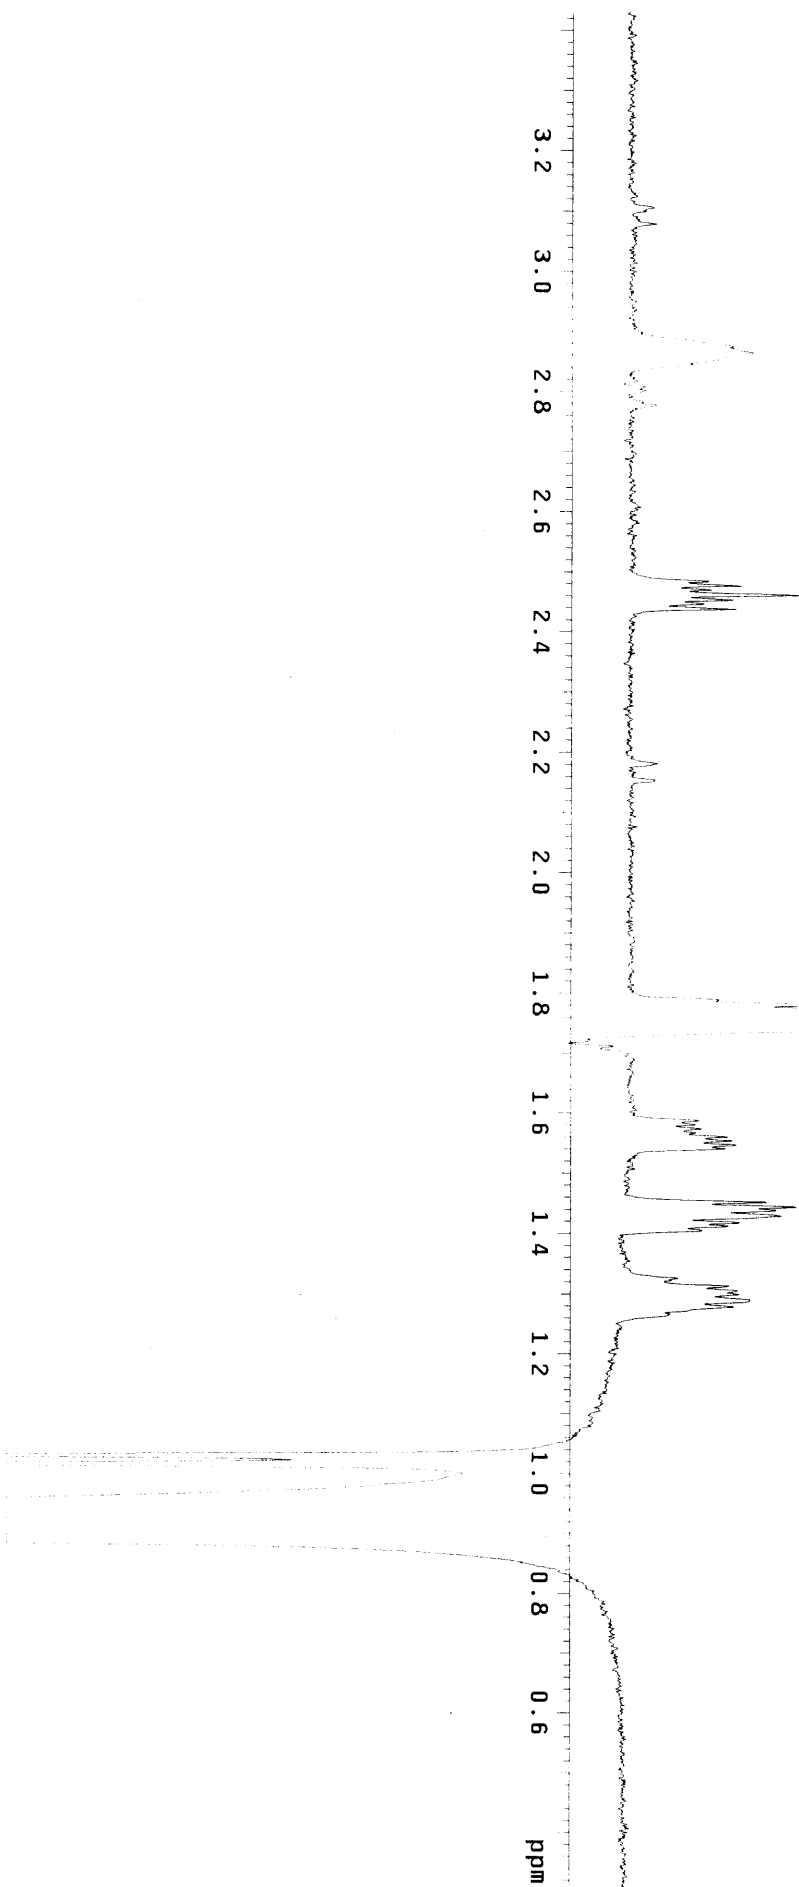

1jcu1-132-2-f1-1h  
Pulse Sequence: szpul  
Solvent: cdcl3  
Ambient temperature  
User: 1-12-87  
File: 1jcu1-132-2-f1-1h  
INOVA-400 "nmr400"

Relax. delay 3.000 sec  
Pulse 48.5 degrees  
Acq. time 2.000 sec  
Width 5132.5 Hz  
8 Repetitions  
OBSERVE H1, 399.9486704 MHz  
DATA PROCESSING  
Line broadening 0.1 Hz  
F1 size 65536  
Total time 10 min, 41 sec

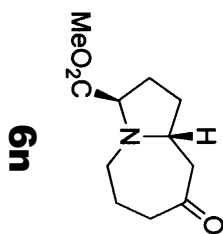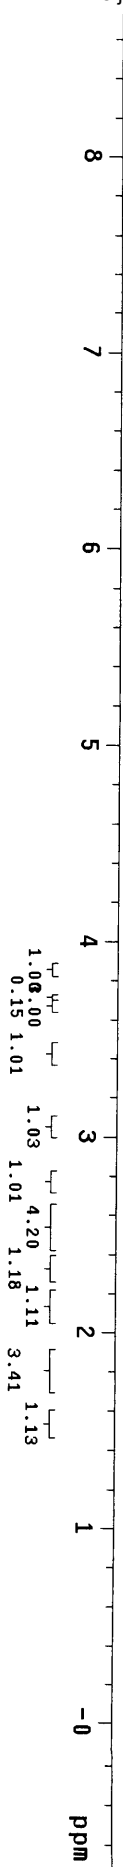

1icui-132-2-13C

Data Collected on:  
nmr500-inova500  
Archive directory:  
/export/home/vnmr1/vnmrsys/data  
Sample directory:

File: CARBON

Pulse Sequence: szpul  
Solvent: cdcl3

Temp. 25.0 C / 298.1 K  
Operator: icui

Relax. delay 3.000 sec  
Pulse 58.7 degrees  
Acq. time 1.300 sec  
Width 38004.8 Hz  
2145 repetitions  
OBSERVE C13, 125.6889826 MHz  
DECOUPLE H1, 499.8588575 MHz  
Power 36 dB  
on during acquisition  
off during delay  
WALTZ-16 modulated  
DATA PROCESSING  
Line broadening 1.0 Hz  
FT size 131072  
Total time 0 min

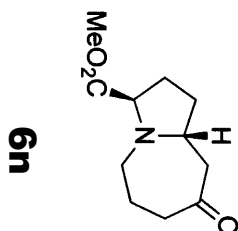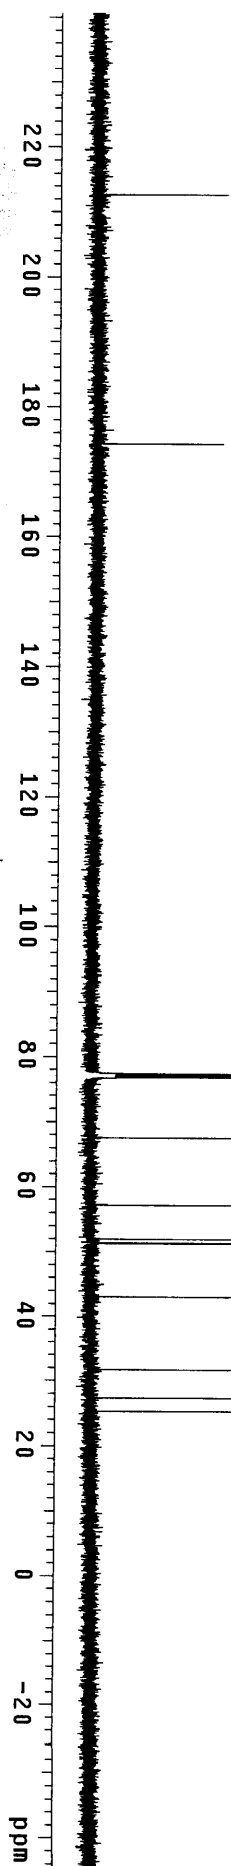

H1\_CDCL3

Archive directory:  
Sample directory:

Pulse Sequence: relayah  
Solvent: cdcl3  
Ambient temperature  
File: jlcui-132-2-cosynew  
INNOVA-500 "nmrserver"

Relax. delay 2.000 sec  
COSY 90-90  
Acq. time 0.150 sec  
Width 3648.5 Hz  
2D Width 3648.5 Hz  
24 repetitions  
128 increments  
OBSERVE H1, 499.8563566 MHz  
DATA PROCESSING  
Sine bell 0.070 sec  
F1 DATA PROCESSING  
Sine bell 0.021 sec  
FT size 1024 x 1024  
Total time 1 hr, 51 min, 47 sec

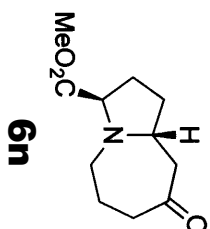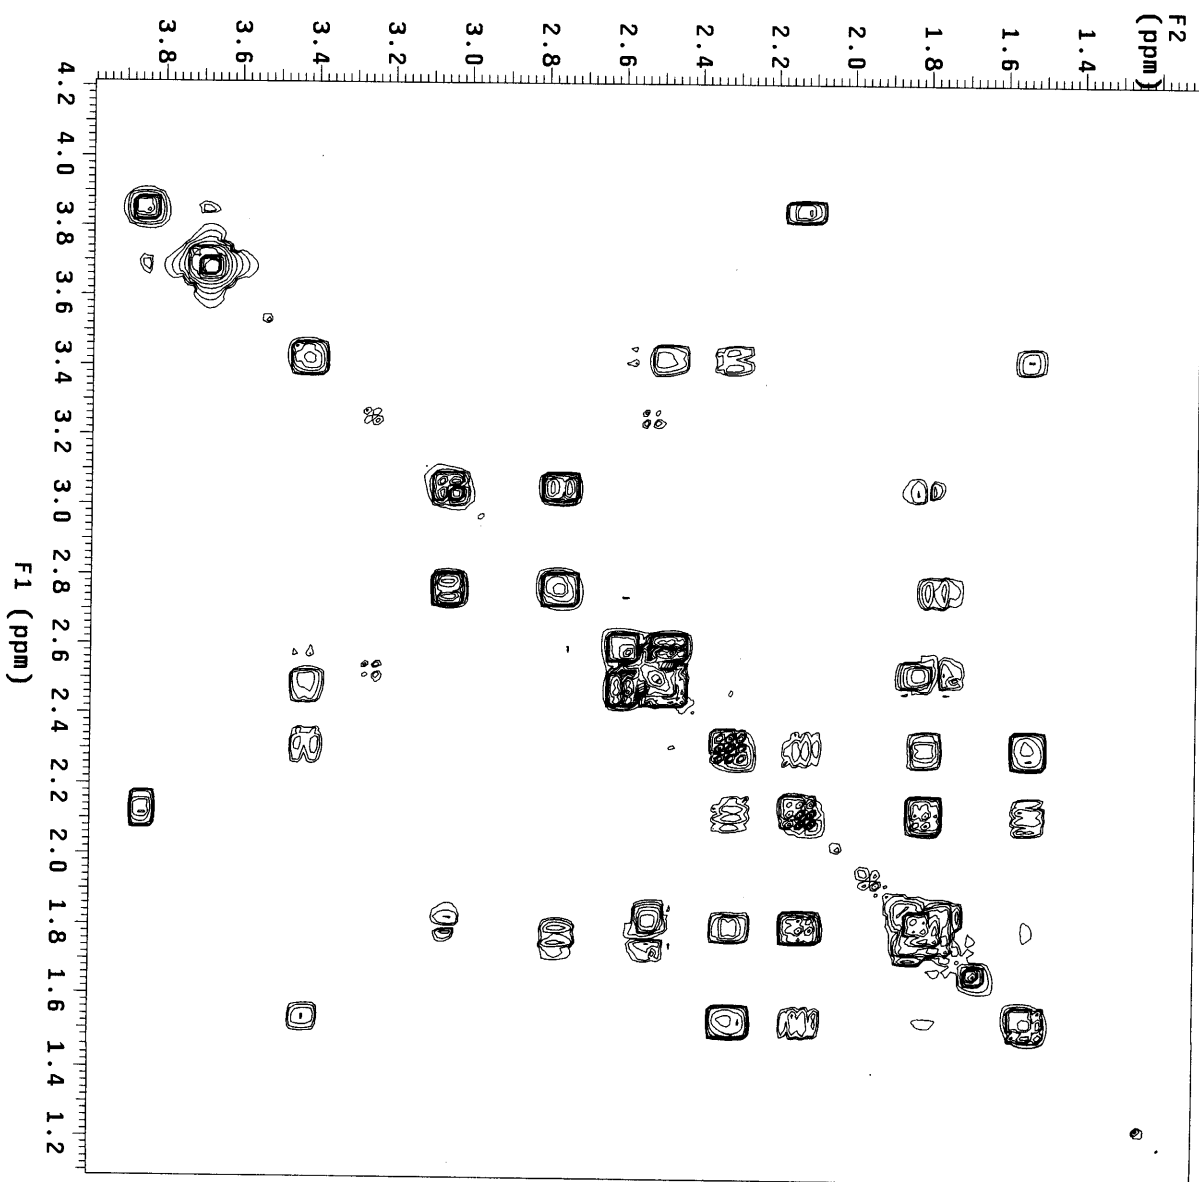

STANDARD PROTON PARAMETERS  
Selective band center: 3.43 (ppm); width: 37.5 (Hz)  
Archive directory: 1cut  
Sample directory: 1cut  
Pulse Sequence: NOESY1D  
Solvent: CDCl<sub>3</sub>  
Temp: 22.0 C / 295.1 K  
File: 11cut-1012-noesy-34  
INOVA-500 "nmrserver"  
Relax. delay 1.000 sec  
Pulse: 90.0 degrees  
Acq. time 2.049 sec  
Width 3998.8 Hz  
116 repetitions  
OBSERVE H1, 499.8563615 MHz  
DATA PROCESSING  
FT size 16384  
Total time 13 min, 17 sec

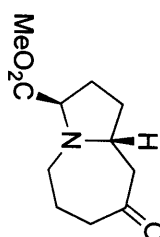

**6n**

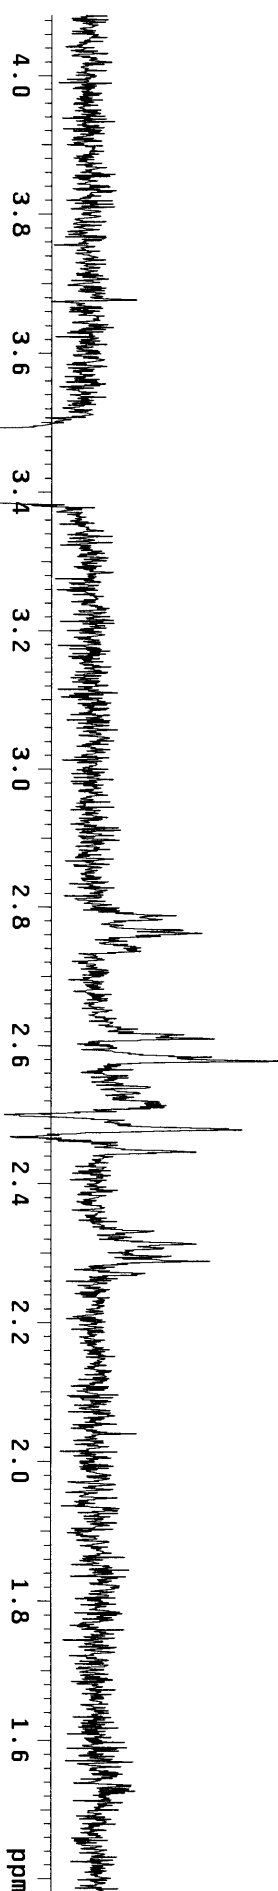

STANDARD PROTON PARAMETERS  
Selective band center: 3.86 (ppm); wid  
th: 24.9 (Hz)

exp2 NOESY1D

|                     |          |            |             |
|---------------------|----------|------------|-------------|
| ACQUISITION         |          | DECOUPLER  |             |
| sw                  | 3998.8   | dn         | C13         |
| at                  | 2.049    | dm         | mm          |
| np                  | 16384    | SAMPLE     |             |
| fb                  | 2000     | date       | Oct 13 2009 |
| bs                  | 4        | solvent    | CDCl3       |
| ss                  | 2        | file       | exp         |
| d1                  | 1.000    | SPECIAL    |             |
| nt                  | 256      | temp       | 22.0        |
| ct                  | 220      | gain       | 46          |
| TRANSMITTER         |          | spin       | 0           |
| tn                  | H1       | pw30       | 9.100       |
| sfreq               | 499.859  | FLAGS      |             |
| tor                 | -249.9   | spsu1      | y           |
| tpwr                | 53       | tl         | n           |
| pw                  | 9.100    | in         | n           |
| NOESY               |          | dp         | y           |
| mixn                | 0.500    | hs         | nm          |
| sweepwr             | 39       | PROCESSING |             |
| sweepnpw            | 1500.000 | fn         | not used    |
| sweepshp            | sech180  | DISPLAY    |             |
| DPFGSE              | sp       | 472.7      |             |
| selshapeA NOESY1D_~ | wp       | 2217.1     |             |
| selpwra             | 3.86p    | vs         | 30518       |
| selpwra             | -7       | sc         | 0           |
| selpwra             | 144586.5 | wc         | 250         |
| gz1v1a              | 3902     | hzmm       | 8.87        |
| gta                 | 0.001000 | is         | 33.57       |
| selshapeB NOESY1D_~ | rf1      | 3382.3     |             |
| selpwrb             | 3.86p    | rfp        | 3629.0      |
| selpwrb             | -7       | th         | 14          |
| selpwrb             | 144586.5 | tns        | 100.000     |
| gz1v1b              | 5853     | at         | cdc ph      |
| gtb                 | 0.001000 |            |             |
| gstadb              | 0.000500 |            |             |
| GRADIENT            |          |            |             |
| gz1v1c              | -975     |            |             |
| gtc                 | 0.001000 |            |             |
| gstab               | 0.000500 |            |             |
| hsg1v1              | 4878     |            |             |
| hsgt                | 0.005000 |            |             |
| PRESATURATION       |          |            |             |
| satmode             | n        |            |             |

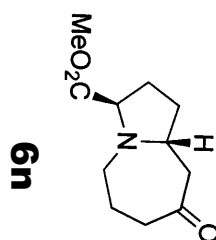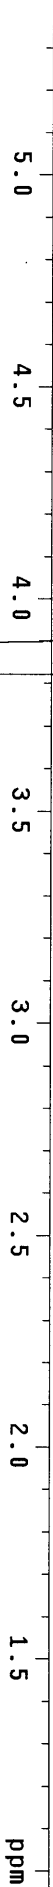

11cu1-3-12-1-1H

Data Collected on:  
nmr500-inova500  
Archive directory:  
/export/home/vnmr1/vnmr.sys/data  
Sample directory:

File: 11cu1-3-12-1-1H

Pulse Sequence: szpu1

Solvent: cdcl3

Operator: 1cu1

Relax. delay 2.000 sec  
Pulse 56.8 degrees  
Acq. time 2.668 sec  
Width 5997.0 Hz  
20 Repetitions  
OBSERVE H1, 499.8563607 MHz  
DATA PROCESSING  
Resol. enhancement -0.0 Hz  
FT size 32768  
Total time 0 min

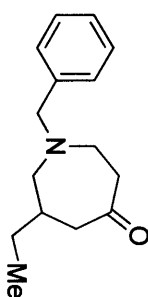

8

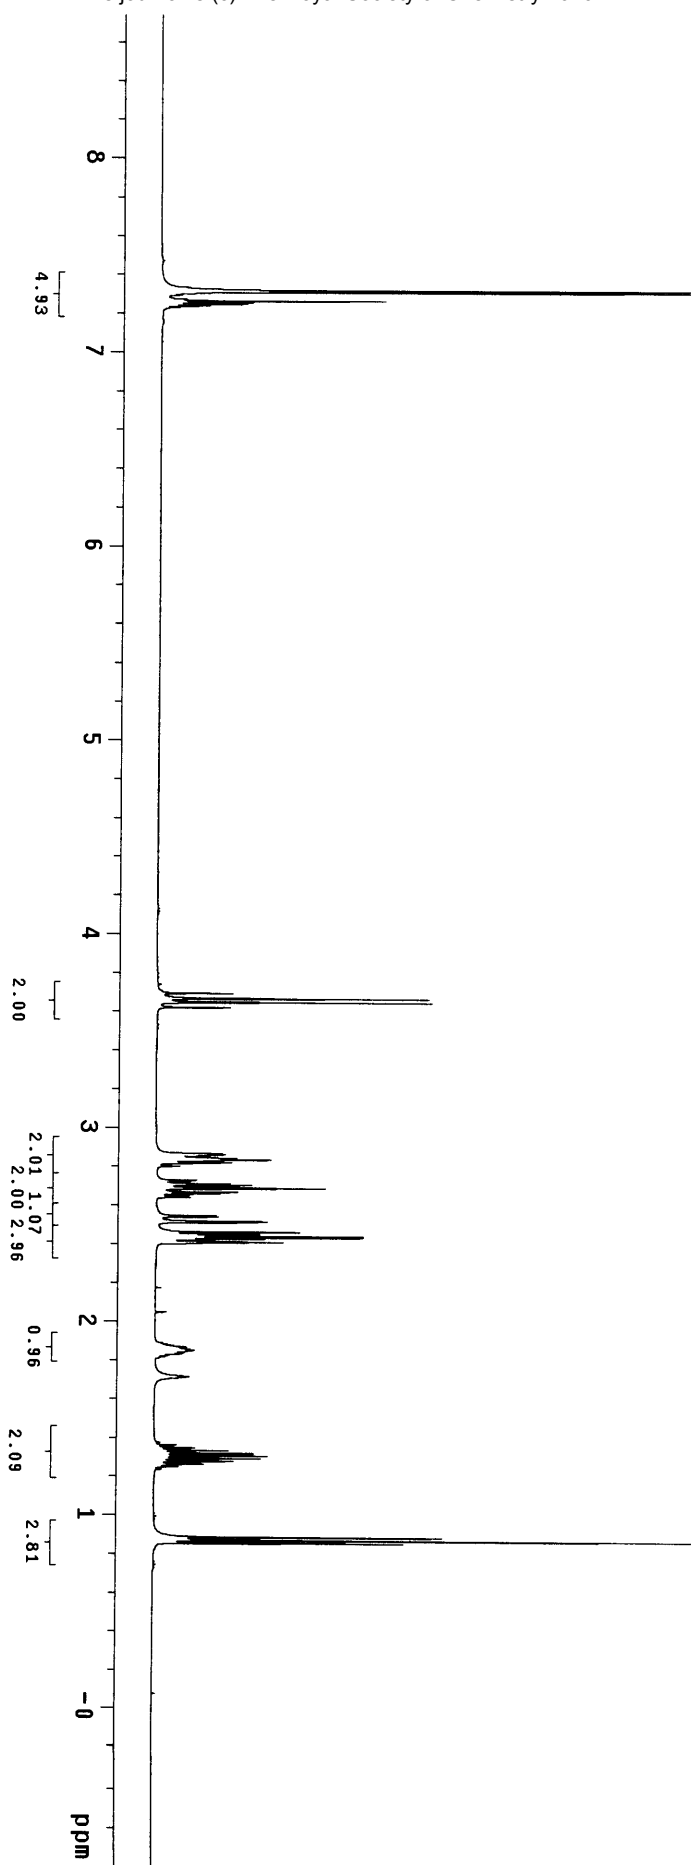

11cui-3-12-1-13C

Data Collected on:  
nmr500-jnova500  
Archive directory:  
/export/home/vmmr1/vmmr/sys/data  
Sample directory:

File: 11cui-3-13-1-13C

Pulse Sequence: s2pu1  
Solvent: cdcl3

Temp. 25.0 C / 298.1 K  
Operator: 1cui

Relax. delay 3.000 sec  
Pulse 58.7 degrees

Acq. time 1.300 sec  
Width 40000.0 Hz

520 Repetitions  
OBSERVE C13, 125.6889866 MHz  
DECUPLE H1, 499.8588575 MHz

Power 36 dB  
on during acquisition  
off during delay

WALTZ-16 modulated  
DATA PROCESSING

Line broadening 1.0 Hz  
Ft size 131072  
Total time 0 min

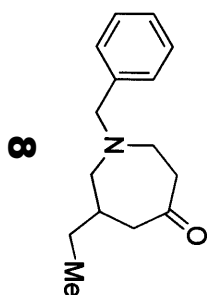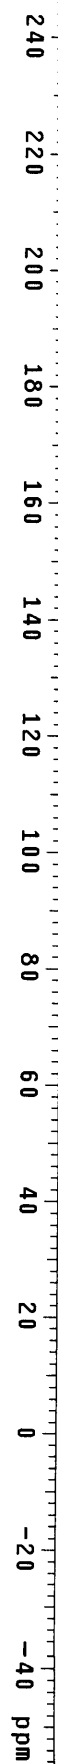

11cu1-3-13-2-1H

Data Collected on:  
nmr500-inova500  
Archive directory:  
/export/home/vnmr1/vnmr500/data  
Sample directory:

File: H1

Pulse Sequence: szpu1  
Solvent: cdcl3  
Operator: 1cu1

Relax. delay 2.000 sec  
Pulse 56.8 degrees  
Acq. time 2.668 sec  
Width 5997.0 Hz  
36 Repetitions  
OBSERVE H1, 499.8563607 MHz  
DATA PROCESSING  
Resol. enhancement -0.0 Hz  
FT size 32768  
Total time 0 min

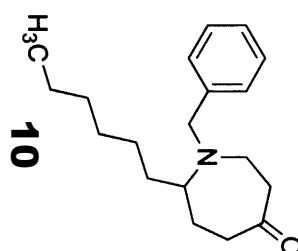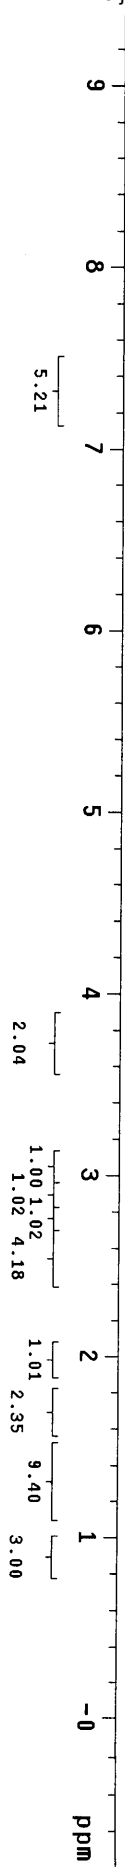

1tuci-106-1-13C

Data Collected on:  
nmr500-inova500  
Archive directory:  
/export/home/vnmr1/vnmr500/data  
Sample directory:

File: CARBON

Pulse Sequence: s2pul  
Solvent: cdcl3  
Temp. 25.0 C / 298.1 K  
Operator: 1tuci

Relax. delay 3.000 sec  
Pulse 58.7 degrees  
Acq. time 1.300 sec  
Width 40000.0 Hz  
1348 repetitions  
OBSERVE C13, 125.688866 MHz  
DECOUPLE H1, 499.858575 MHz  
Power 36 db  
on during acquisition  
off during delay  
WALTZ-16 modulated  
DATA PROCESSING  
Line broadening 1.0 Hz  
FT size 131072  
Total time 0 min

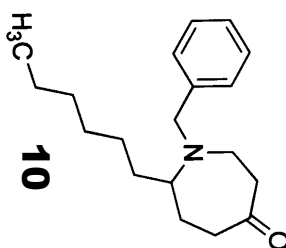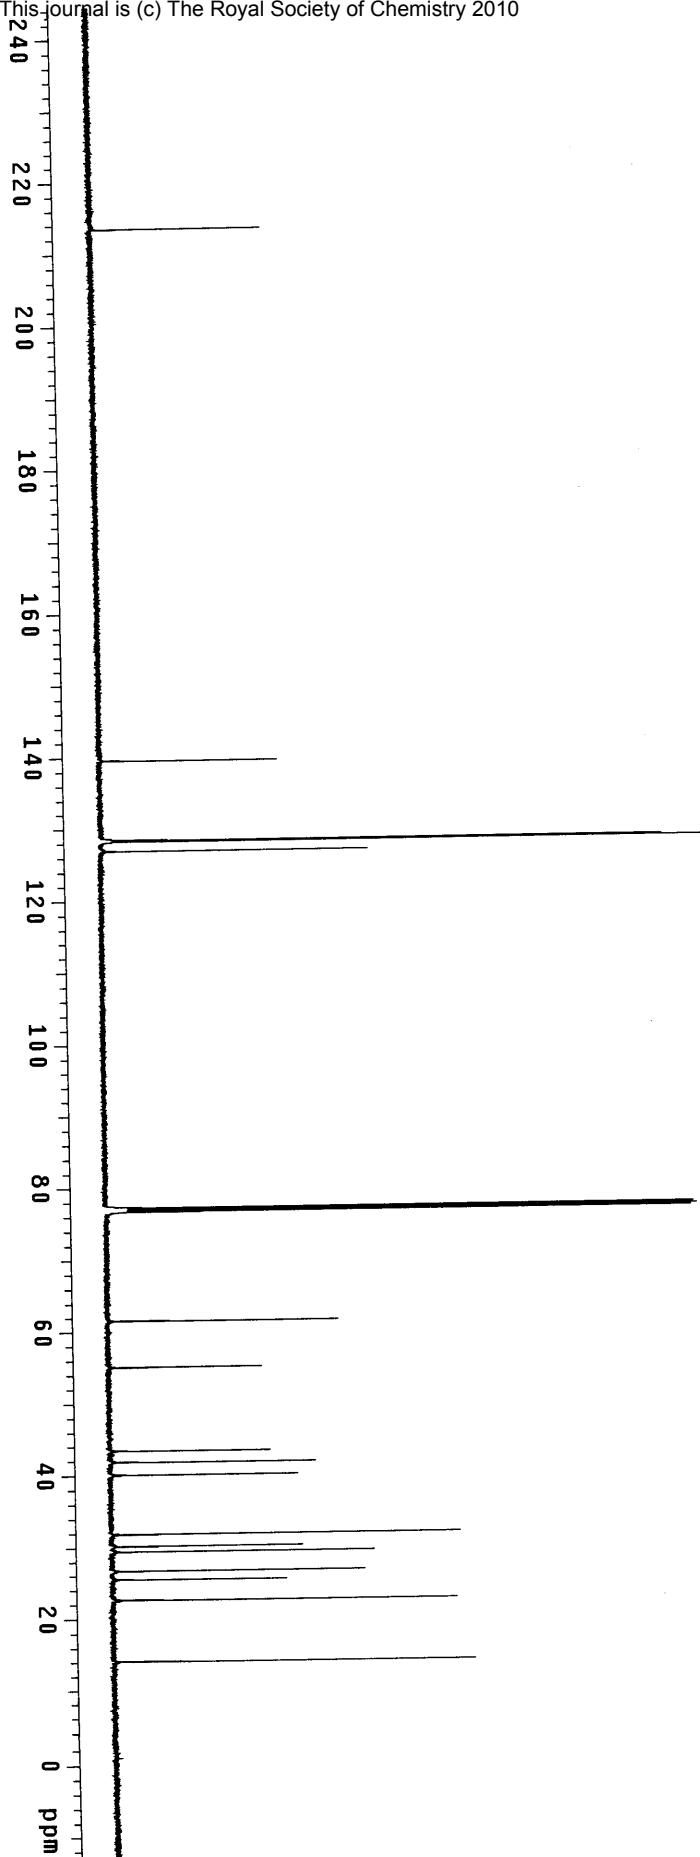

11cui-3-18-1-1H  
Pulse Sequence: szpu1  
Solvent: cdcl3  
Ambient temperature  
User: 1-12-87  
File: 11cui-3-18-1-1H  
INOVA-400 "nmr400"

Relax. delay 3.000 sec  
Pulse 48.5 degrees  
Acq. time 2.000 sec  
Width 5132.5 Hz  
16 repetitions  
OBSERVE H1, 399.9486712 MHz  
DATA PROCESSING  
Line broadening 0.1 Hz  
FT size 6536  
Total time 10 min, 41 sec

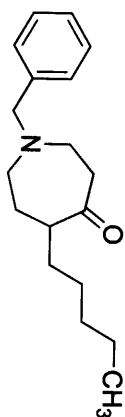

**12**

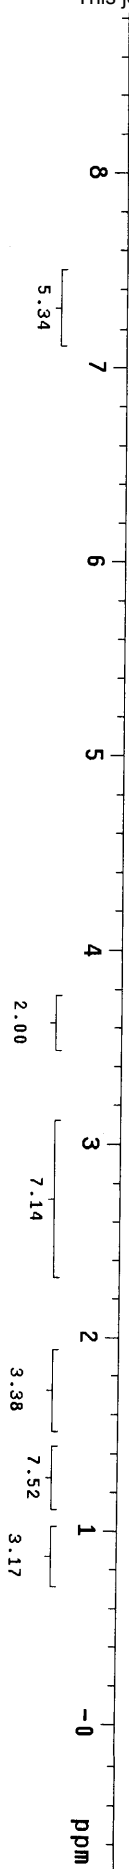

11cui-3-18-1-F2-13C

Data Collected on:  
nmr500-inova500  
Archive directory:  
/export/home/vnmr1/vnmr500/data  
Sample directory:

File: CARBON

Pulse Sequence: s2pul  
Solvent: cdcl3  
Temp. 25.0 C / 298.1 K  
Operator: 1cui

Relax. delay 3.000 sec  
Pulse 58.7 degrees  
Acq. time 1.300 sec  
Width 40000.0 Hz  
718 repetitions  
OBSERVE C13, 125.6889841 MHz  
DECOUPLE H1, 499.858575 MHz  
Power 36 dB  
on during acquisition  
off during delay  
WALTZ-16 modulated  
DATA PROCESSING  
Line broadening 1.0 Hz  
FT size 131072  
Total time 0 min

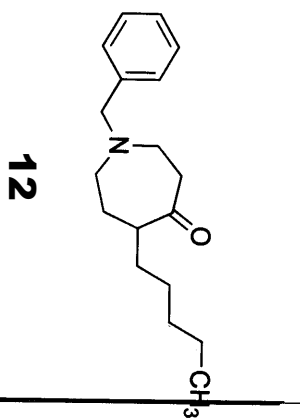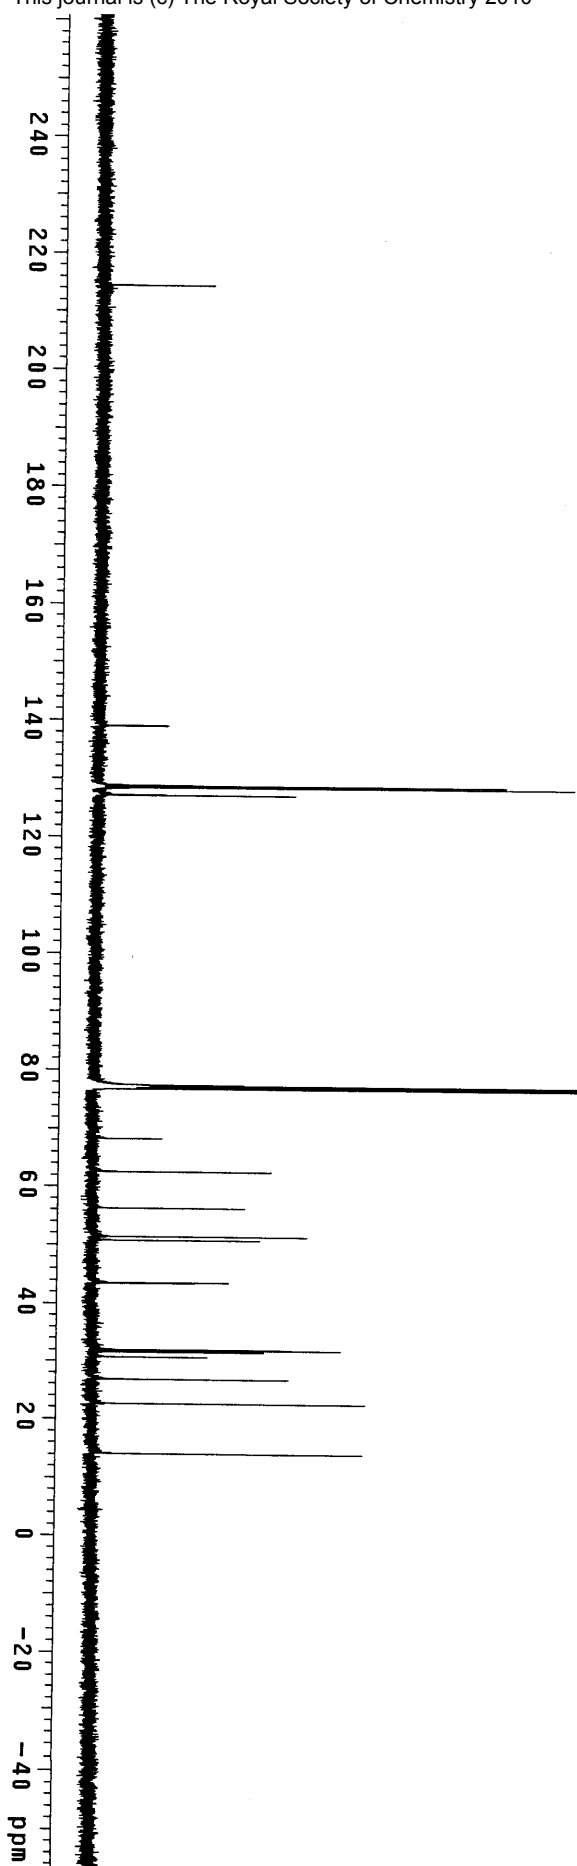

11cui-3-18-1-f1-1H

Pulse Sequence: s2pul

Solvent: cdcl3

Ambient temperature

User: 1-12-87

INOVA-400 "nmr-400"

Relax. delay 3.000 sec

Pulse 48.5 degrees

Acq. time 2.000 sec

Width 5132.5 Hz

32 repetitions

OBSERVE H1, 399.9486712 MHz

DATA PROCESSING

Line broadening 0.1 Hz

FT size 65536

Total time 10 min, 41 sec

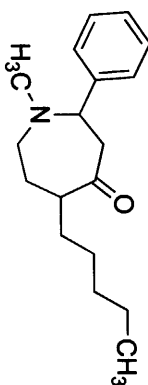

**12' (one diastereomer)**

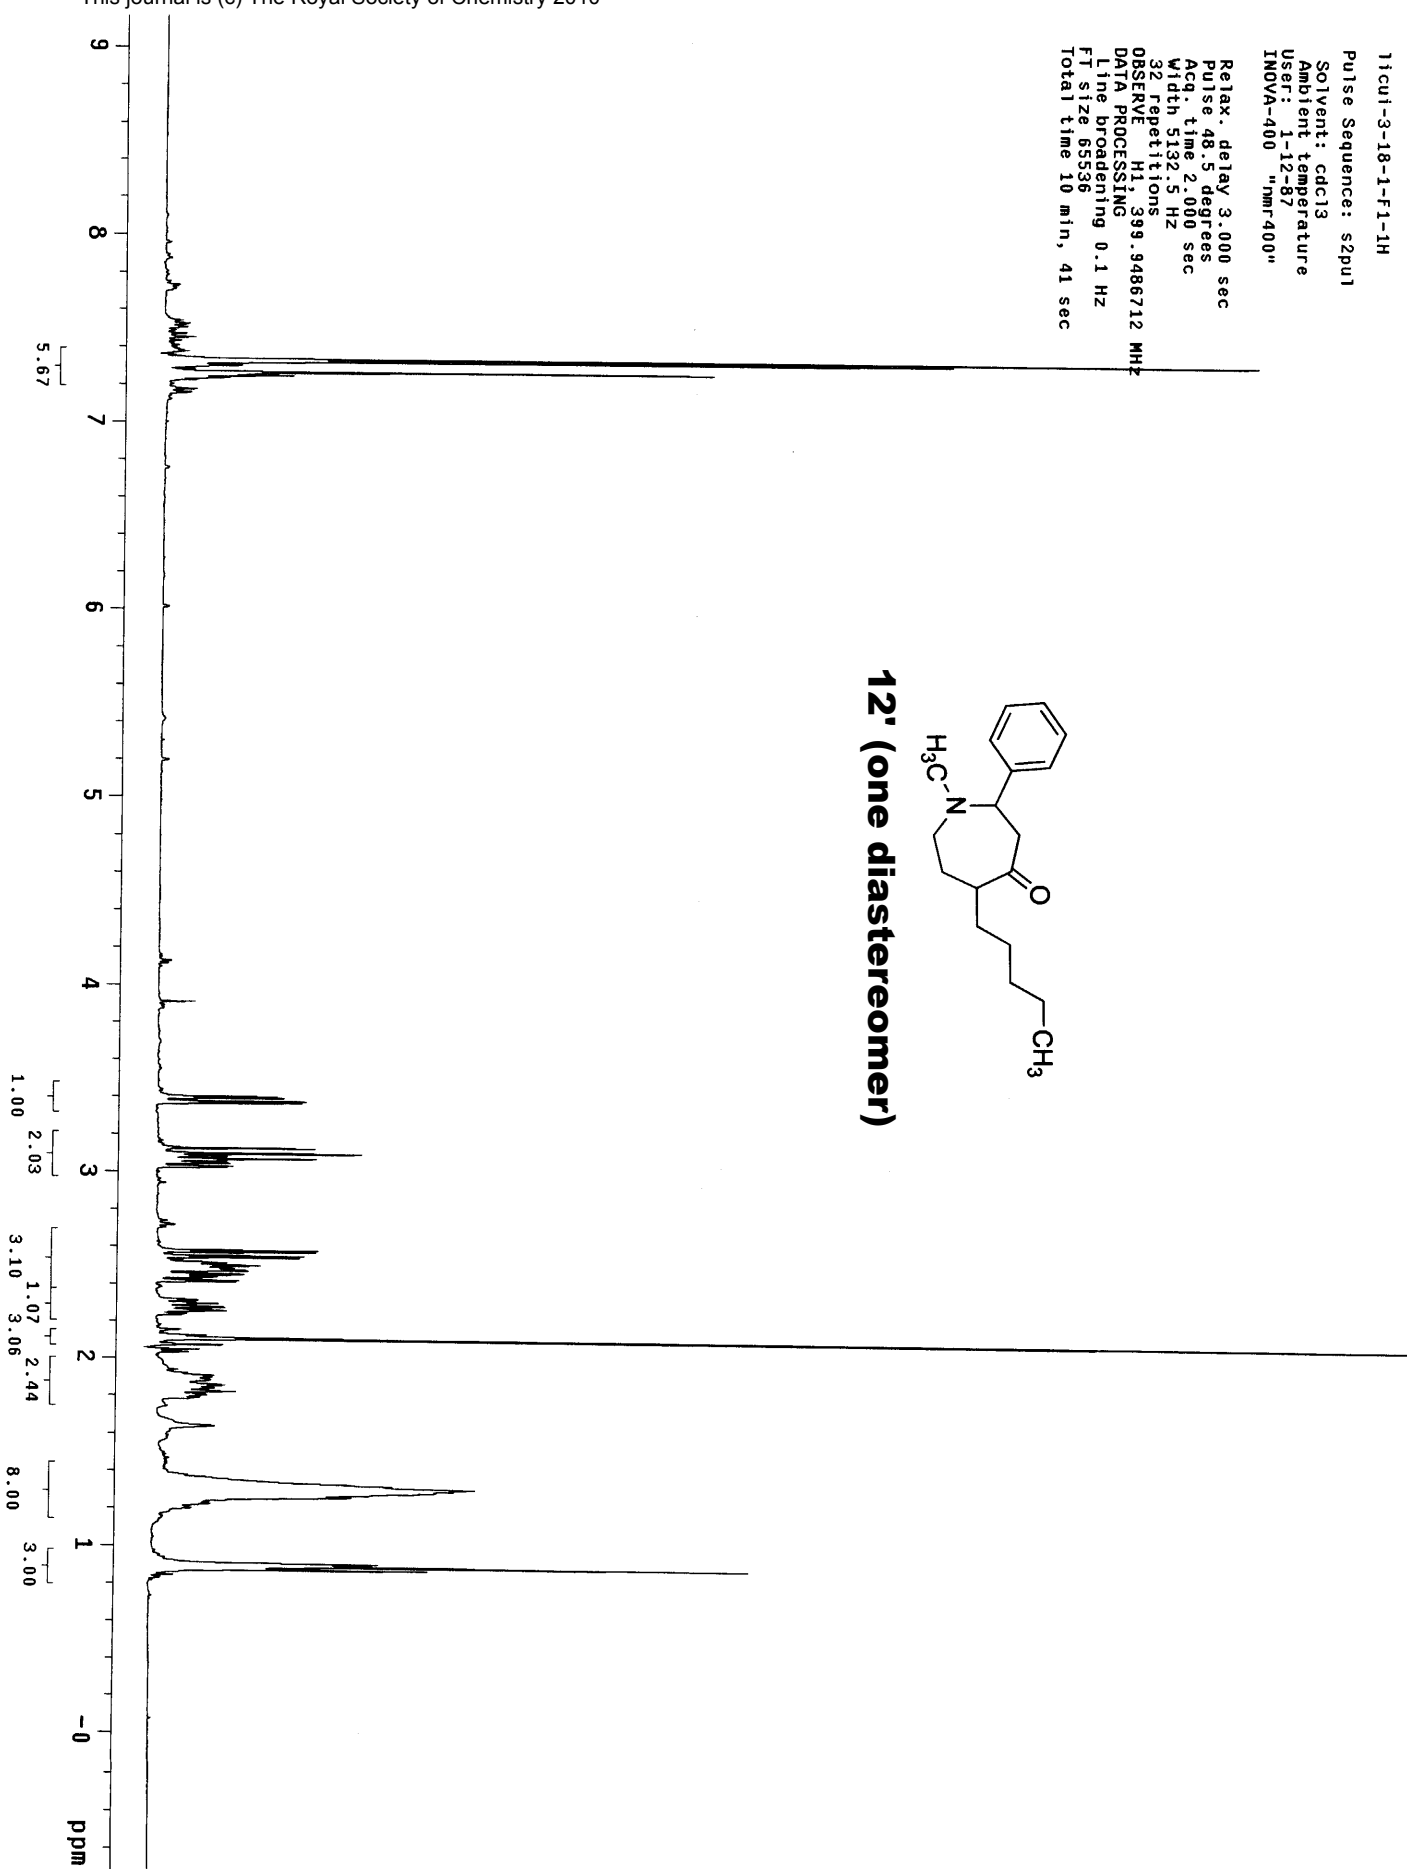

1luc1-106-1-13C

Data Collected on:  
nmr500-inova500  
Archive directory:  
/export/home/vnmr1/vnmrsys/data  
Sample directory:

File: CARBON

Pulse Sequence: szpu1  
Solvent: cdcl3  
Temp. 25.0 C / 298.1 K  
Operator: lcu1

Relax. delay 3.000 sec  
Pulse 58.7 degrees  
Acq. time 1.300 sec  
Width 40000.0 Hz  
558 repetitions  
OBSERVE C13, 125.6689847 MHz  
DECUPLE H1, 499.858575 MHz  
Power 36 dB  
on during acquisition  
off during delay  
WALTZ-16 modulated  
DATA PROCESSING  
line broadening 1.0 Hz  
FT size 131072  
Total time 0 min

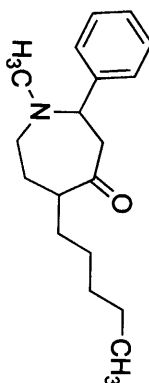

**12' (one diastereomer)**

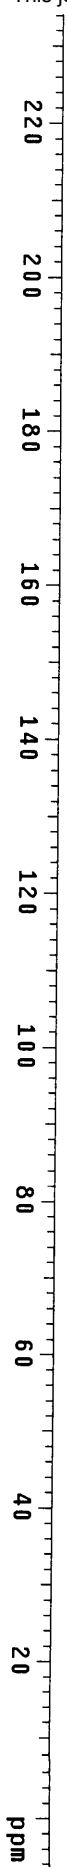

H1\_CDCL3

Data Collected on: nmr500-inova500  
Archive directory:

Sample directory:

File: relayh

Pulse Sequence: relayh

Solvent: cdcl3

Operator: tcut

Relax. delay 2.000 sec

COZY 90-90

Acq. time 0.150 sec

Width 4412.6 Hz

2D Width 4412.6 Hz

12 repetitions

256 increments

OBSERVE H1, 499.8563582 MHz

DATA PROCESSING

Sine bell 0.075 sec

F1 DATA PROCESSING

Sine bell 0.021 sec

FT size 2048 x 1024

Total time 0 min

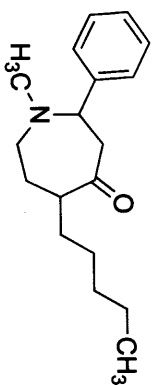

**12' (one diastereomer)**

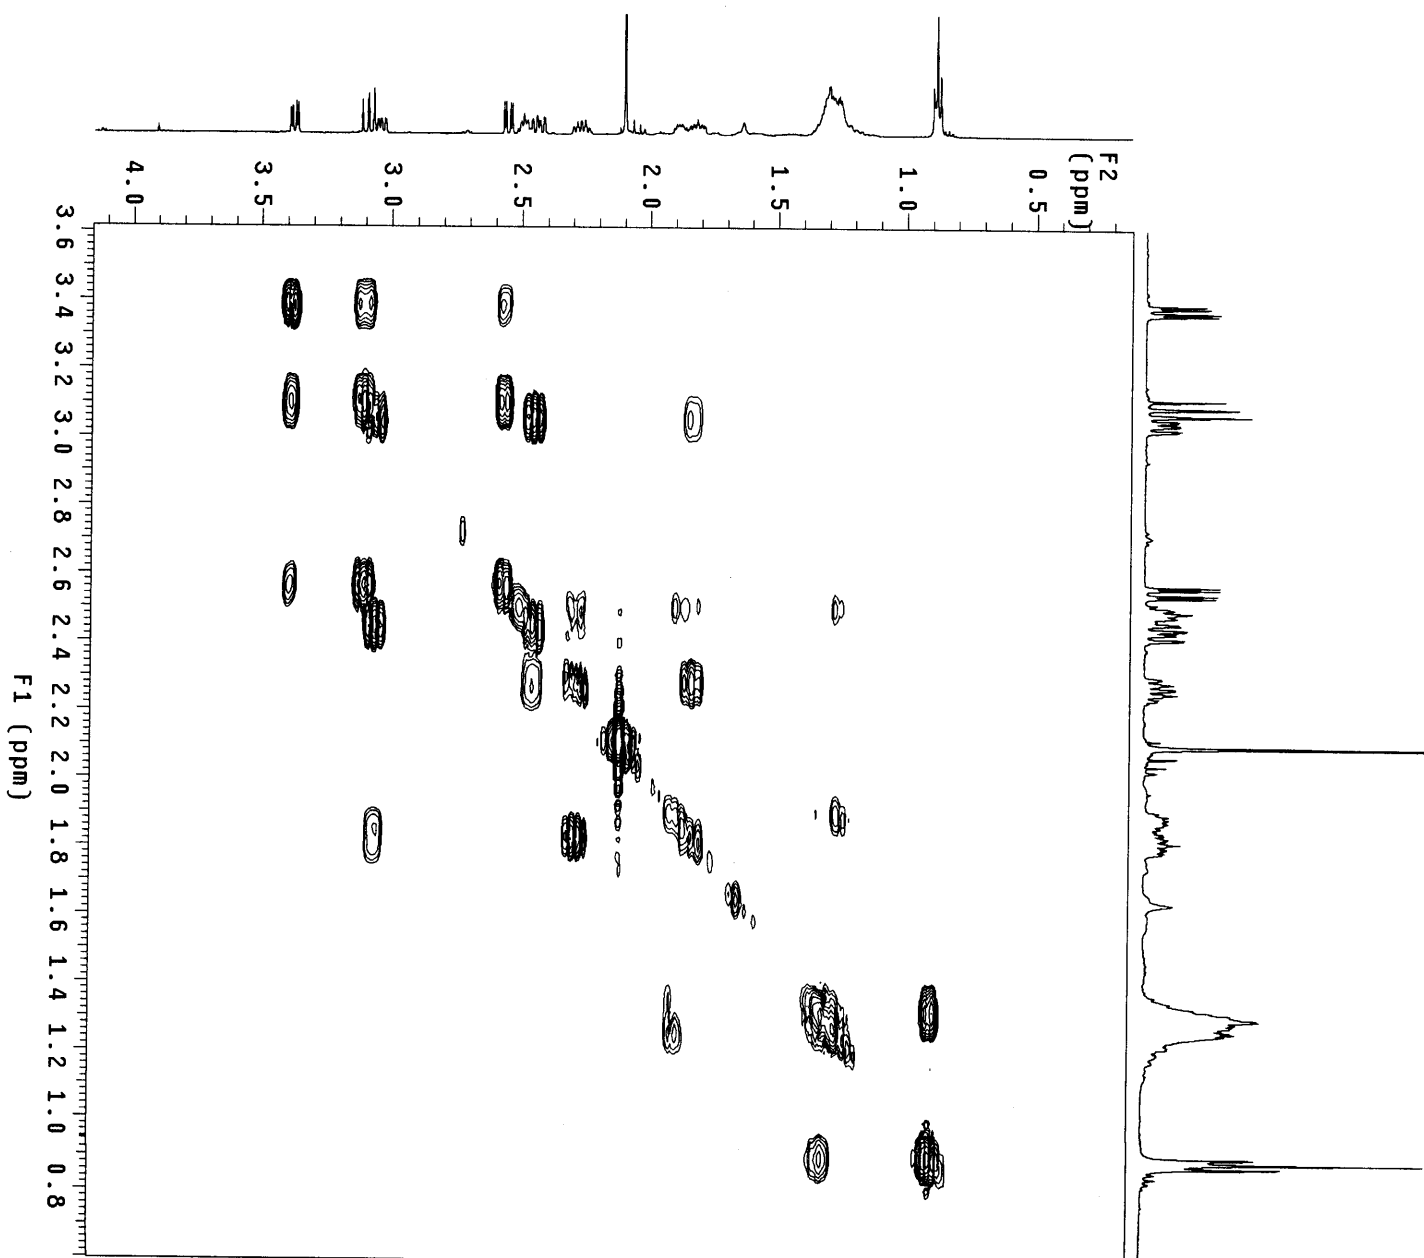

Z\*SPEC IDG400-5FE  
UCSB

Pulse Sequence: szpu1

Solvent: cdcl3

Ambient temperature

User: 1-12-87

File: jicui-3-18-T8

INDVA-500 "nmrserver"

Relax. delay 3.000 sec

Pulse 48.5 degrees

Acq. time 2.000 sec

Width 5132.5 Hz

4 repetitions

OBSERVE H1, 399.9466712 MHz

DATA PROCESSING

Line broadening 0.1 Hz

FI size 65536

Total time 10 min, 41 sec

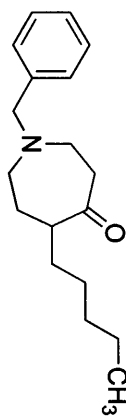

**12**

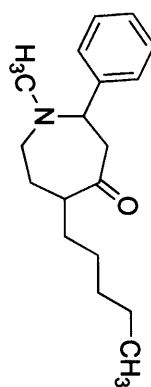

**12'**

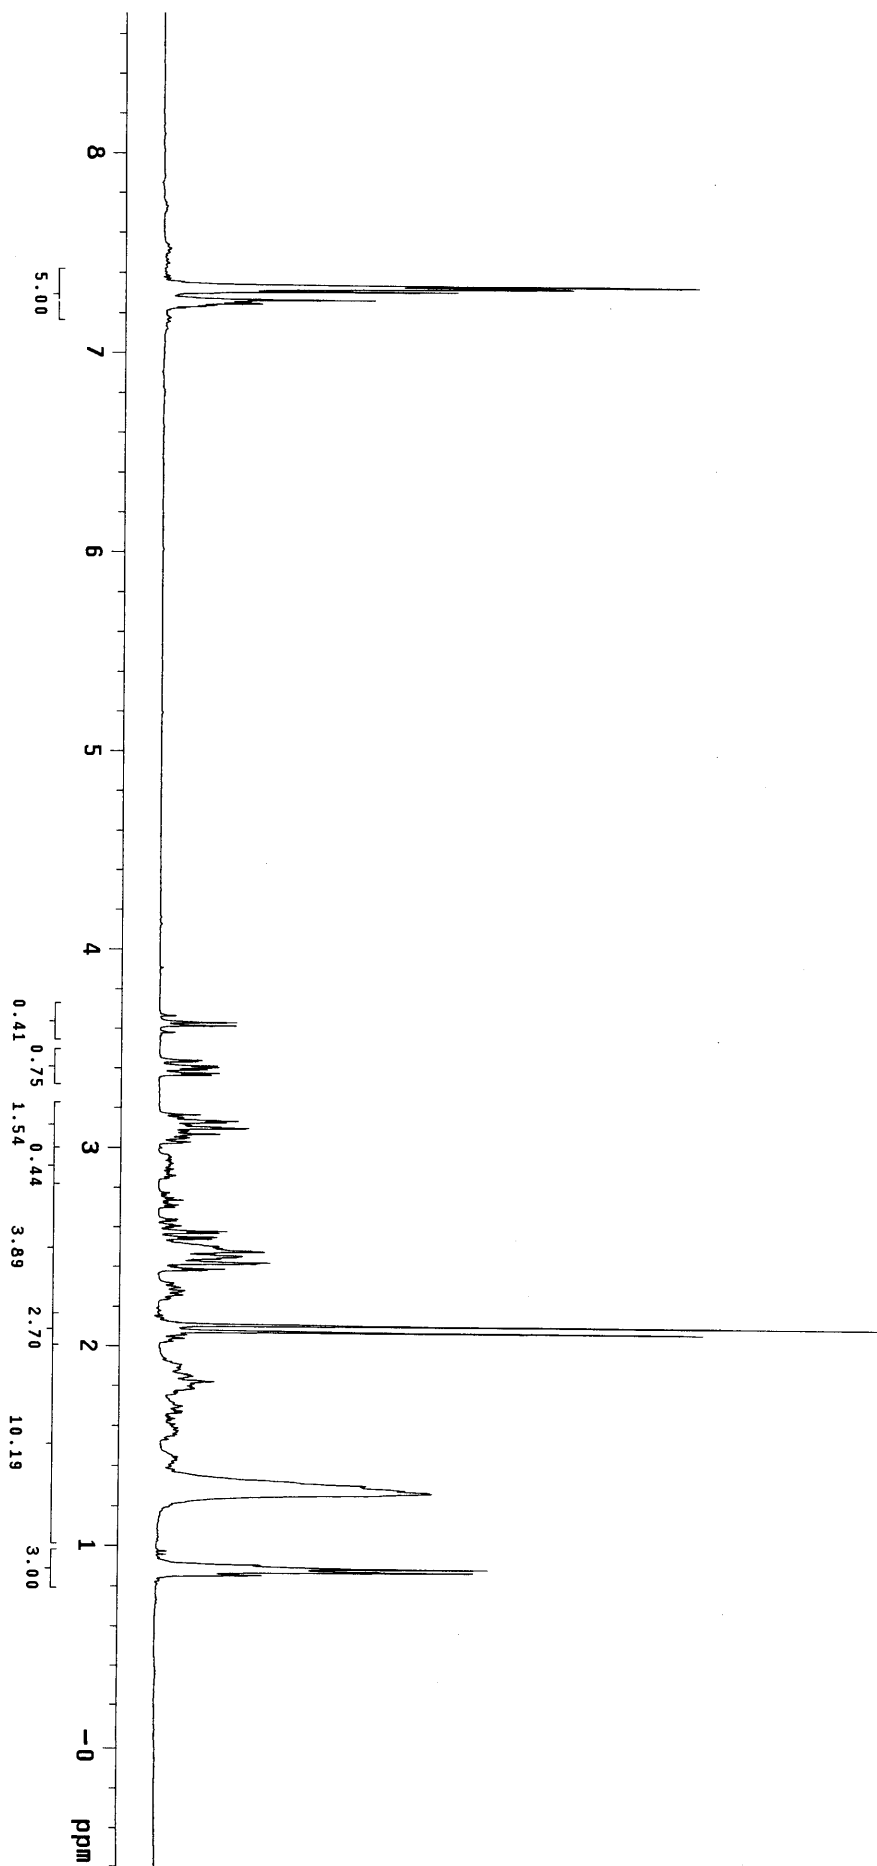

11cui-3-18-T9-13C

Data Collected on:  
nmr500-inova500  
Archive directory:  
/export/home/vnmr1/vnmr5s/data  
Sample directory:

File: CARBON

Pulse Sequence: s2pul  
Solvent: cdc13  
Temp. 25.0 C / 298.1 K  
Operator: 1cui

Relax. delay 3.000 sec  
Pulse 58.7 degrees  
Acq. time 1.300 sec  
Width 40000.0 Hz  
1217 repetitions  
OBSERVE C13, 125.688835 MHz  
DECOUPLE H1, 499.858575 MHz  
Power 36 db  
on during acquisition  
off during delay  
WALTZ-16 modulated  
DATA PROCESSING  
Line broadening 1.0 Hz  
FI size 131072  
Total time 0 min

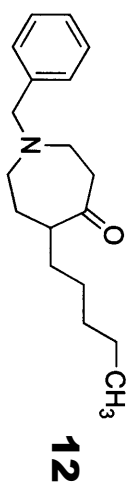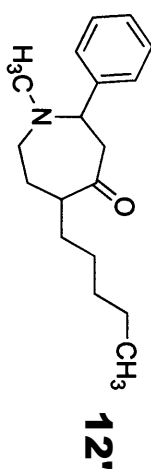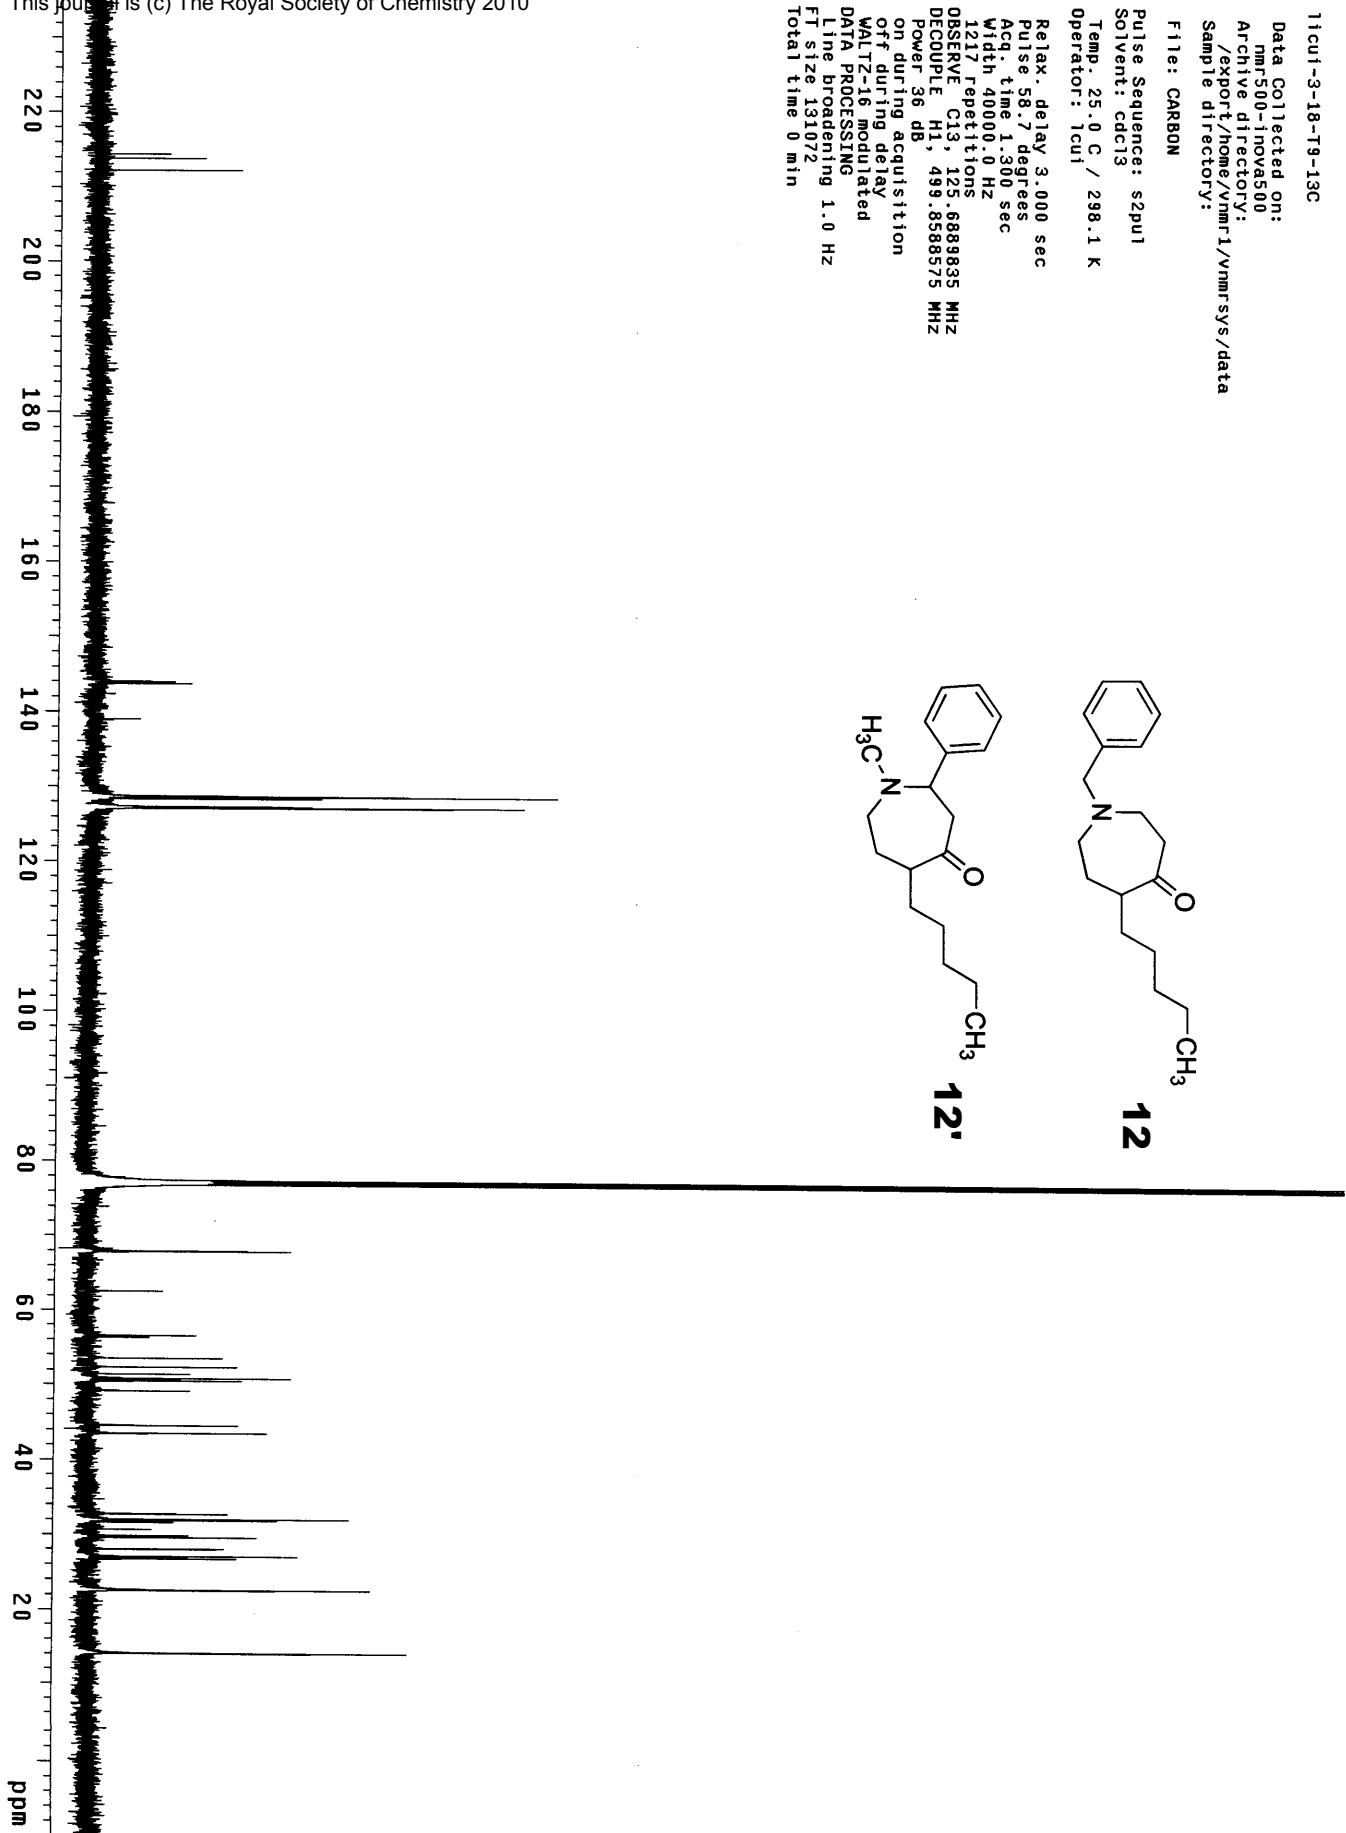

Supplement: c001314e.pdf [file c001314e.pdf]
